# Supplementary material for: Current-controlled nickel-catalyzed multi-electrophile electroreductive cross-coupling
Source: Royal Society of Chemistry journal article supplement (doi:10.1039/d2gc04427g), 2023-01-01
Supplement: d2gc04427g1.pdf [file d2gc04427g1.pdf]

# Supporting Information

## Current-controlled Nickel-catalyzed Multi-electrophile Electroreductive Cross-Coupling

Shentong Xie<sup>[a]</sup>, Yuqing Yin<sup>[a]</sup>, Ya Wang<sup>[a]</sup>, Jiannan Wang<sup>[a]</sup>, Xiaoqian He<sup>[b]</sup>, Ruopeng Bai<sup>\*[b]</sup> and Renyi Shi<sup>\*[a]</sup>

*[a] School of Chemical Engineering and Technology*

*Xi'an Jiaotong University*

*Xi'an 710049 (P. R. China)*

E-mail: [renyi.shi@xjtu.edu.cn](mailto:renyi.shi@xjtu.edu.cn)

*[b] School of Chemistry and Chemical Engineering, Chongqing Key Laboratory of  
Theoretical and Computational Chemistry*

*Chongqing University*

*Chongqing 400030 (P. R. China)*

E-mail: [ruopeng@cqu.edu.cn](mailto:ruopeng@cqu.edu.cn)

|                                                                            |      |
|----------------------------------------------------------------------------|------|
| 1. General Analytical Information                                          | S2   |
| 2. General Reagent Information                                             | S2   |
| 3. General Procedure for Electroreductive Carbonylative Cross-electrophile | S3   |
| 4. Large Scale Reaction procedure                                          | S5   |
| 5. Optimizations of Ni-Catalyzed Electroreductive Carbonylation            | S6   |
| 6. Control Experiments                                                     | S7   |
| 3. Kinetic experiments                                                     | S9   |
| 7. Cyclic Voltammetry                                                      | S11  |
| 5. DFT Calculations                                                        | S14  |
| 8. Analytical Data of Substrates and Products                              | S30  |
| 9. NMR Spectra of Substrates and Products                                  | S46  |
| 10. References                                                             | S113 |

## General Analytical Information

Nuclear Magnetic Resonance spectra were recorded on a Bruker Avance 400 MHz instruments at ambient temperature. All  $^1\text{H}$  NMR spectra were measured in part per million (ppm) relative to the signals of tetramethylsilane (TMS, 0.00 ppm) added into the deuterated chloroform ( $\text{CDCl}_3$ , 7.30 ppm) unless otherwise stated. Data for  $^1\text{H}$  NMR were reported as follows: chemical shift, multiplicity (s = singlet, d = doublet, t = triplet, q = quartet, quint = quintet, m = multiplet, dd = doublet of doublets, dt = doublet of triplets, td = triplet of doublets), coupling constants, and integration. All  $^{13}\text{C}$  NMR spectra were reported in ppm relative to tetramethylsilane (0.00 ppm) unless otherwise stated, and were obtained with complete  $^1\text{H}$  decoupling. All GC analyses were performed on a Perkin-Elmer Clarus 400 GC system with an FID detector. High-resolution mass spectra were obtained with an AB Triple 5600 mass spectrometer by ESI on a TOF mass analyzer.

## General Reagent Information

Unless otherwise noted, all chemicals used in the preparations of starting materials and in the nickel catalyzed electroreductive carbonylative cross-coupling reactions were commercially available and were used as received without further purifications or prepared according to previous work. Solvents transferred to the glove box without exposure to air. Anhydrous dimethylacetamide (DMA) (99.8% purity) were purchased from China National Pharmaceutical Group Corporation.

## General Procedure for Electroreductive Carbonylative Cross-electrophile

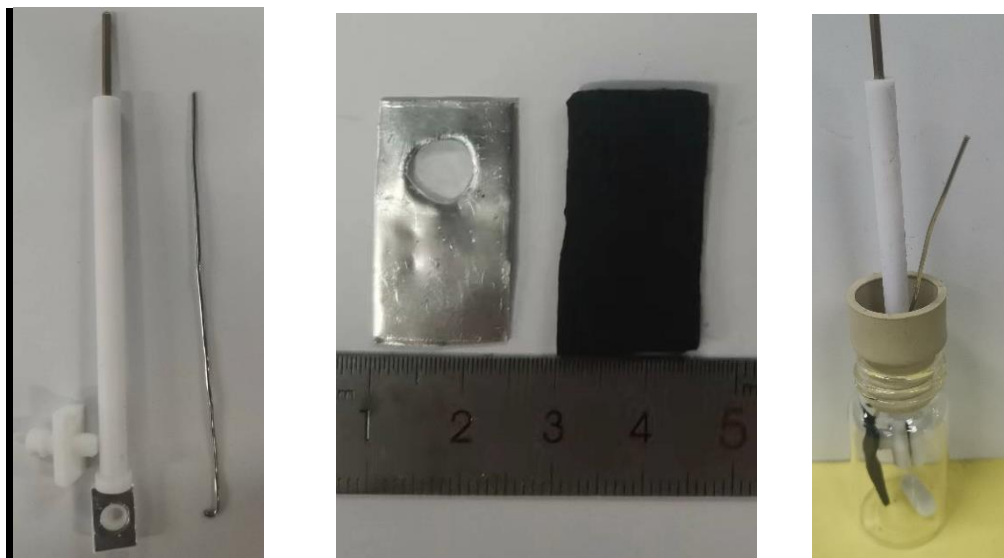

Figure S1 Hand-made electrochemical cell

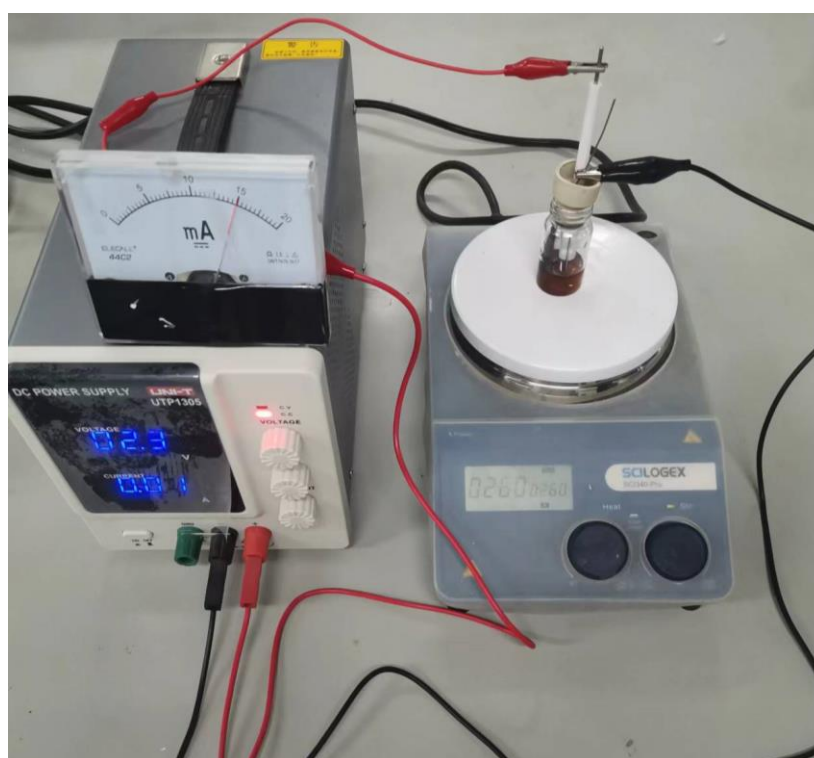

Figure S2 Electrochemical reactor

## General procedure A (Electroreductive Carbonylative of benzyl chlorides and iodobenzenes)

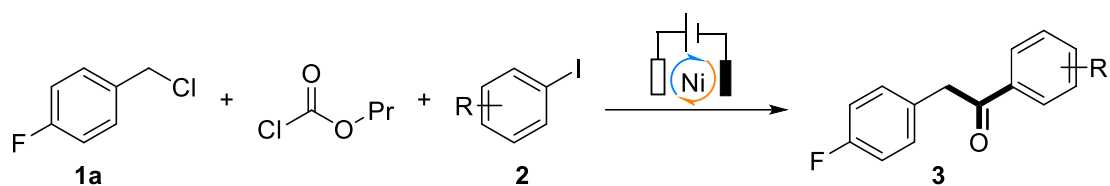

An oven-dried 20 mL re-sealable screw-cap test tube equipped with a Teflon-coated magnetic stir bar was sequentially charged with dtbpy (15 mol%),  $\text{NiCl}_2 \cdot \text{dme}$  (10 mol%), LiOTf (0.2 M) in the glove. Then DMA (6 mL), benzyl chloride (0.75 mmol), ClCOOPr (1.5 mmol.), iodobenzene (0.5 mmol) were added into the tube in turn. All these procedures were conducted in the glovebox. Screw the vial cap with electrode (Zn anode (12 mm X 15 mm), graphite felt cathode (12 mm X 15 mm)) onto the vial to finger tight and adapt the electrochemical cell. Then removed from the glove box. The reaction mixture was stirred and electrolyzed at a constant current (15 mA) at room temperature for 4h. After electrolysis, the product was extracted from the crude reaction mixture with ethyl acetate (4 X 30 mL). The organic layers were combined, and washed with brine (60 mL). Dried over  $\text{Na}_2\text{SO}_4$ , filtered, and concentrated under reduced pressure. The product was purified by silica gel column chromatography, using petroleum ether /EA = 20/1 (v/v) as an eluent.

### General procedure B (Electroreductive Carbonylation of alkyl iodides and iodobenzenes)

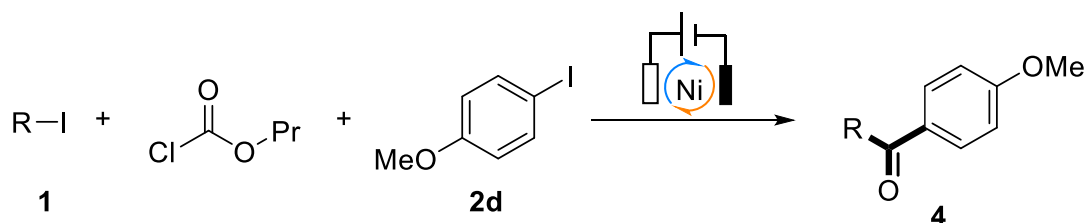

An oven-dried 20 mL re-sealable screw-cap test tube equipped with a Teflon-coated magnetic stir bar was sequentially charged with dtbpy (15 mol%),  $\text{NiCl}_2 \cdot \text{dme}$  (10 mol%), LiOTf (0.2 M), KF (2 mmol) in the glove. Then 4 mL DMA and 2 mL dioxane, alkyl iodides (0.6 mmol), ClCOOPr (2 mmol.), iodobenzenes (0.5 mmol) were added into the tube in turn. All these procedures were conducted in the glovebox. Screw the vial cap with electrode (Zn anode (12 mm X 15 mm), graphite felt cathode (12 mm X 15 mm)) onto the vial to finger tight and adapt the electrochemical cell. Then removed from the glove box. The reaction mixture was stirred and electrolyzed at a constant current (15 mA) at room temperature for 4h. After electrolysis, the product was extracted from the crude reaction mixture with ethyl acetate (4 X 30 mL). The organic layers were combined, and washed with brine (60 mL). Dried over  $\text{Na}_2\text{SO}_4$ , filtered, and concentrated under reduced pressure. The product was purified by silica gel column chromatography, using petroleum ether /EA = 20/1 (v/v)

as an eluent.

## Large Scale Reaction procedure

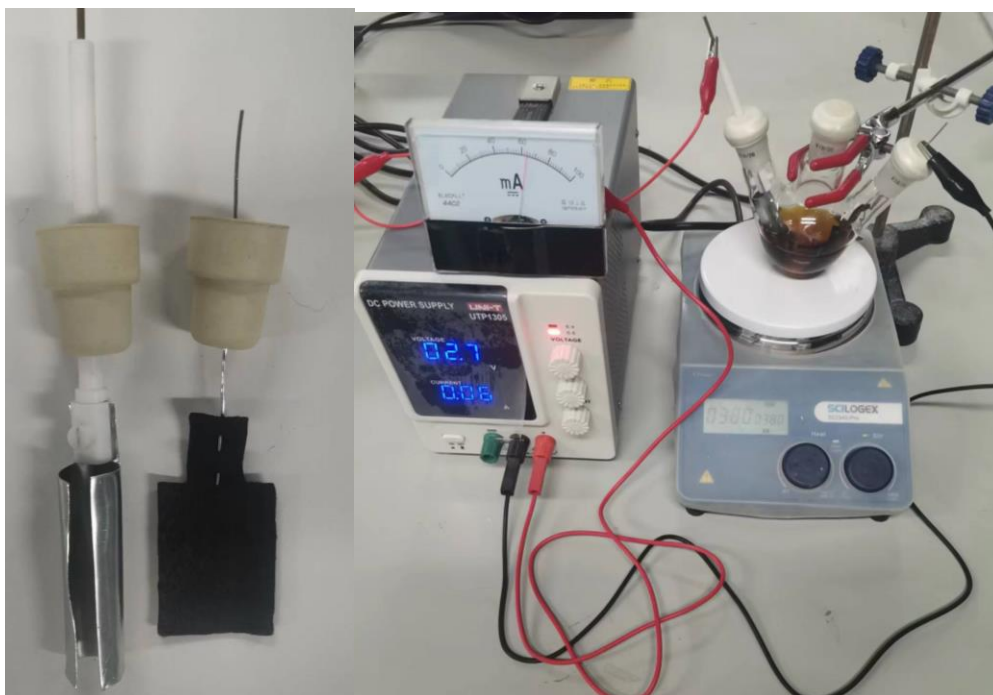

Figure S3 Scale reaction set-up

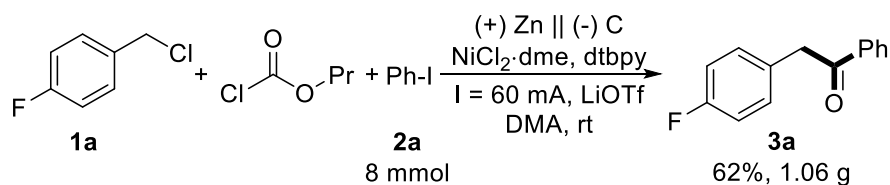

An oven-dried 100 mL three-necked flask equipped with a Teflon-coated magnetic stir bar was sequentially charged with dtbpy (15 mol%), NiCl<sub>2</sub>·dme (10 mol%), LiOTf (0.2 M) in the glove. Then 60 mL DMA, 1-(chloromethyl)-4-fluorobenzene **1a** (12 mmol), ClCOOPr (24 mmol.), iodobenzene **2a** (8 mmol) were added into the three-necked flask in turn. All these procedures were conducted in the glovebox. Screw the vial cap with electrode onto the vial to finger tight and adapt the electrochemical cell. Then removed from the glove box. The reaction mixture was stirred and electrolyzed at a constant current (60 mA) at room temperature for 12h. After electrolysis, the product was extracted from the crude reaction mixture with ethyl acetate (4 X 80 mL). The organic layers were combined, and washed with brine (160 mL). Dried over Na<sub>2</sub>SO<sub>4</sub>, filtered, and concentrated under reduced pressure. The product was purified by silica gel column chromatography, using petroleum ether /EA = 20/1 (v/v) as an eluent.

## Optimizations of Ni-Catalyzed Electroreductive Carbonylation

### Optimizations of electroreductive carbonylation of 1a and 2a

Table 1. Screening of the Reaction Conditions

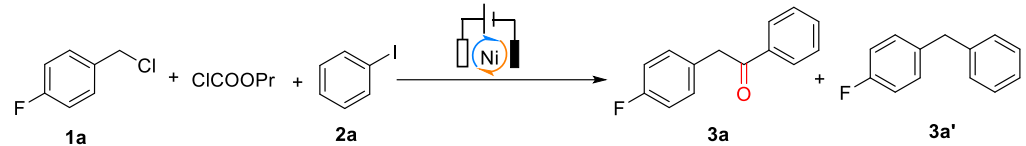

| entry          | deviation from standard conditions                | yield 3a [%]               | yield 3a' [%] |
|----------------|---------------------------------------------------|----------------------------|---------------|
| <b>1</b>       | <b>none</b>                                       | <b>85 (78)<sup>c</sup></b> | <b>14</b>     |
| 2 <sup>b</sup> | Zn powder, 12h                                    | 48                         | 42            |
| 3              | I = 0 mA, 12h                                     | 4                          | 66            |
| 4              | I = 3 mA, 12h                                     | 44                         | 53            |
| 5              | I = 5 mA, 12h                                     | 53                         | 40            |
| 6              | I = 10 mA, 8h                                     | 66                         | 32            |
| 7              | I = 20 mA, 3h                                     | 78                         | 15            |
| 8              | Mg instead of Zn                                  | 37                         | 59            |
| 9              | Fe instead of Zn                                  | 11                         | 46            |
| 10             | Ni foam instead of graphite felt                  | 35                         | 21            |
| 11             | using 12 mmol% dtbpy                              | 72 (62) <sup>c</sup>       | 23            |
| 12             | bpy instead of dtbpy                              | 62                         | 24            |
| 13             | dmbpy instead of dtbpy                            | 0                          | 0             |
| 14             | <sup>n</sup> Bu <sub>4</sub> NBr instead of LiOTf | 31                         | 67            |
| 15             | <sup>n</sup> BuNPF <sub>6</sub> instead of LiOTf  | 75                         | 20            |
| 16             | CO instead of ClCOOPr                             | 8                          | trace         |
| 17             | No NiCl <sub>2</sub> ·dme / No dtbpy ligand       | 0                          | 0             |

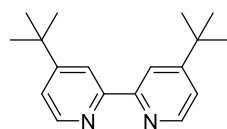

dtbpy

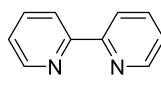

bpy

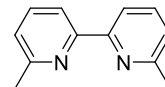

dmbpy

<sup>a</sup> Reaction condition 1: 0.75 mmol **1a**, 1.5 mmol ClCOOPr, 0.5 mmol **2a**, 0.2 M LiOTf, 10 mol% NiCl<sub>2</sub>·dme, 15 mol% dtbpy, 6 mL DMAc, Zn anode, graphite felt cathode, undivided cell, constant current of 15 mA, rt, 4h. Conversion was measured by GC using naphthalene as an internal standard.

<sup>b</sup> No electrode and electrolyte, 3 equiv. Zn powder. <sup>c</sup> Isolated yield.

### Optimizations of electroreductive carbonylation of 1o and 2d

Table 2. Screening of the Reaction Conditions

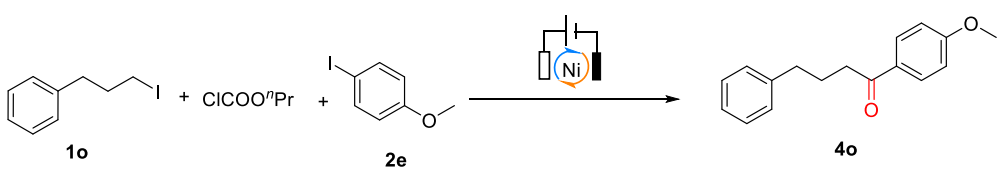

| entry | 1o (mmol) | ClCOOPr (mmol) | Solvent | yield 4o [%] |
|-------|-----------|----------------|---------|--------------|
| 1     | 0.75      | 1.5            | DMAc    | 54           |

|                       |            |          |                         |               |
|-----------------------|------------|----------|-------------------------|---------------|
| 2                     | 0.6        | 1.5      | DMAc                    | 53            |
| 3 <sup>b</sup>        | 0.6        | 1.5      | DMAc                    | 52            |
| 4 <sup>c</sup>        | 0.6        | 1.5      | DMAc                    | 0             |
| 5                     | 0.6        | 2        | DMAc                    | 60            |
| 6 <sup>d</sup>        | 0.6        | 2        | DMAc                    | 42            |
| 7 <sup>e</sup>        | 0.6        | 2        | DMAc                    | 55            |
| 8                     | 0.6        | 2        | DMAc/dioxane 4/2        | 72            |
| 9                     | 0.6        | 2        | DMAc/dioxane 2/4        | 57            |
| <b>10<sup>f</sup></b> | <b>0.6</b> | <b>2</b> | <b>DMAc/dioxane 4/2</b> | <b>79(71)</b> |

<sup>a</sup> Reaction condition: (3-iodopropyl)benzene **1o**, ClCOOPr, 0.5 mmol **2e**, 0.2 M LiOTf, 10 mol% NiCl<sub>2</sub>·dme, 15 mol% dtbpy, 6 mL solvent, Zn anode, graphite felt cathode, undivided cell, constant current of 15 mA, rt, 4h. Conversion was measured by GC using naphthalene as an internal standard.

<sup>b</sup> NiBr<sub>2</sub>·dme. <sup>c</sup> Ligand: 3,2':6',3"-terpyridine. <sup>d</sup> 5 mol% NiCl<sub>2</sub>·dme, 7.5 mol% dtbpy. <sup>e</sup> I= 10 mA. <sup>f</sup> 1.5 mmol KF as an additive.

## Control Experiments

Eq.1 followed the General Procedure B using 6-iodohex-1-en-1-ylum as the substrate; Eq.2 followed the General Procedure B using (iodomethyl)cyclopropane as the substrate.

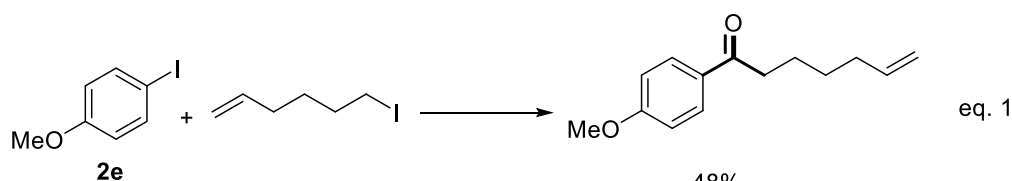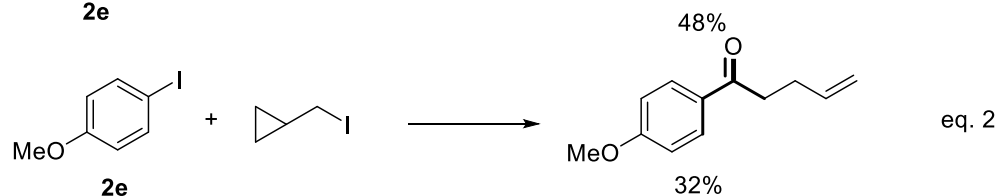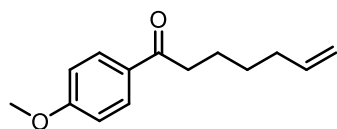

**1-(4-methoxyphenyl)hept-6-en-1-one**<sup>[1]</sup> The product was purified by silica gel column chromatography, using petroleum ether /EA = 20/1 (v/v) as an eluent.

<sup>1</sup>H NMR (400 MHz, CDCl<sub>3</sub>) δ 7.98 – 7.94 (m, 2H), 6.97 – 6.93 (m, 2H), 5.89 – 5.79 (m, 1H), 5.07 – 4.96 (m, 2H), 3.89 (s, 3H), 2.96 – 2.90 (m, 2H), 2.16 – 2.10 (m, 2H), 1.79 – 1.75 (m, 2H), 1.54 – 1.47 (m, 2H).

<sup>13</sup>C NMR (101 MHz, CDCl<sub>3</sub>) δ 199.0, 163.3, 138.6, 130.3, 130.2, 114.6, 113.7, 55.5, 38.1, 33.6, 28.7, 24.1.

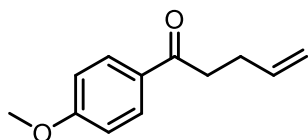

**1-(4-methoxyphenyl)pent-4-en-1-one**<sup>[2]</sup> The product was purified by silica gel column chromatography, using petroleum ether /EA = 20/1 (v/v) as an eluent.

<sup>1</sup>H NMR (400 MHz, CDCl<sub>3</sub>) δ 8.00 – 7.96 (m, 2H), 6.98 – 6.94 (m, 2H), 5.88 (m, 1H), 3.90 (s, 3H), 3.05 (t, *J* = 7.5 Hz, 2H), 2.54 – 2.48 (m, 2H). <sup>13</sup>C NMR (101 MHz, CDCl<sub>3</sub>) δ 198.1, 163.4, 137.5, 130.3, 130.1, 115.2, 113.7, 55.5, 37.4, 28.4.

Eq.3 Without 1-(chloromethyl)-4-fluorobenzene iodobenzene **1a** and iodobenzene **2a**, the electrolysis of ClCO<sub>2</sub>Pr followed the General Procedure A CO could be detected after the reaction using GC; Eq.4 followed the General Procedure A, using **1a** and **2a** as the substrate, CO could be still detected after the reaction using GC.

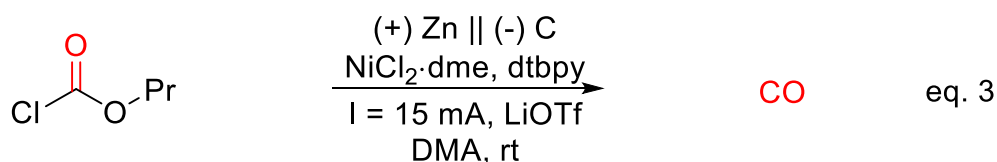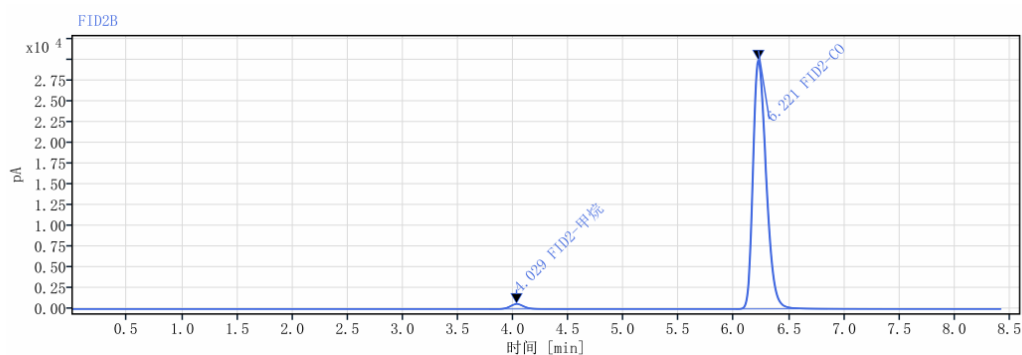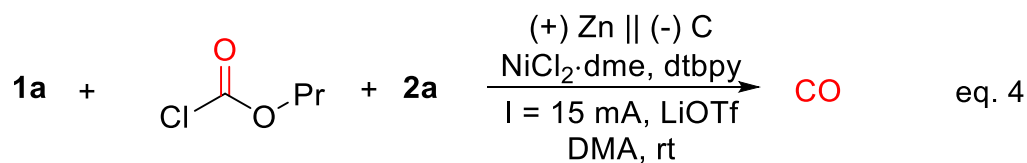



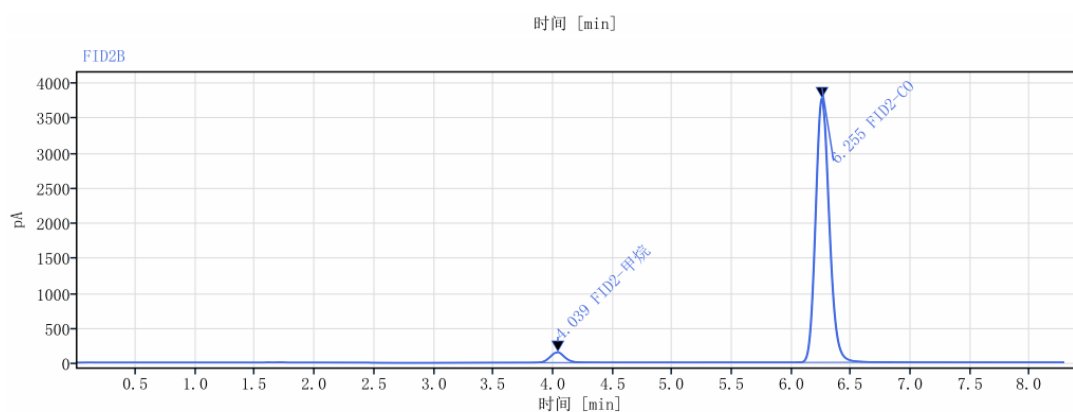

Eq.5 Without ClCO<sub>2</sub>Pr, run the reaction followed the General Procedure A under the atmosphere CO/N<sub>2</sub> (1:7). The desired product 2-(4-fluorophenyl)-1-phenylethan-1-one **3a** was obtained with a yield of 36%.

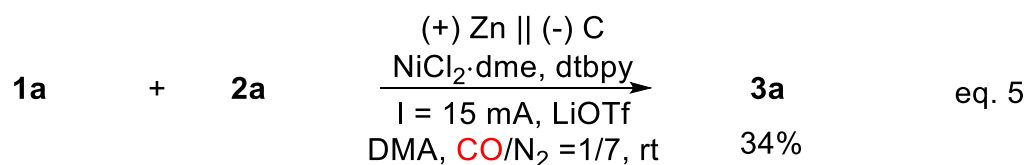

### Kinetic experiments

An oven-dried 20 mL re-sealable screw-cap test tube equipped with a Teflon-coated magnetic stir bar was sequentially charged with dtbpy (15 mol%), NiCl<sub>2</sub>·dme (10 mol%), naphthalene (30 mg) as an internal standard, LiOTf (0.2 M) in the glove. Then 6mL DMA, **1a** (0.75 mmol), ClCOOPr (1.5 mmol.), **2a** (0.5 mmol) were added into the tube in turn. All these procedures were conducted in the glovebox. Screw the vial cap with electrode (Zn anode (12 mm X 15 mm), graphite felt cathode (12 mm X 15 mm)) onto the vial to finger tight and adapt the electrochemical cell. Then removed from the glove box. The reaction mixture was stirred and electrolyzed at a constant current (3mA and 15 mA) at room temperature. The yields of **3a** and **3a'** were detected using GC at different times.

Table 3. Monitor the reaction of nickel-catalyzed electroreductive carbonylation of **1a** and **2a**

| I=3mA |                     |                      | I=15mA |                     |                      |
|-------|---------------------|----------------------|--------|---------------------|----------------------|
| T/h   | yield <b>3a</b> [%] | yield <b>3a'</b> [%] | T/h    | yield <b>3a</b> [%] | yield <b>3a'</b> [%] |
| 1     | 5                   | 1                    | 0.5    | 5                   | 2                    |
| 2     | 11                  | 7                    | 1      | 10                  | 9                    |

|    |    |    |     |    |    |
|----|----|----|-----|----|----|
| 4  | 28 | 18 | 1.5 | 12 | 24 |
| 6  | 39 | 30 | 2   | 13 | 35 |
| 8  | 44 | 37 | 2.5 | 14 | 48 |
| 10 | 49 | 41 | 3   | 15 | 60 |
| 12 | 53 | 44 | 3.5 | 15 | 73 |

Conversion was measured by GC using naphthalene as an internal standard.

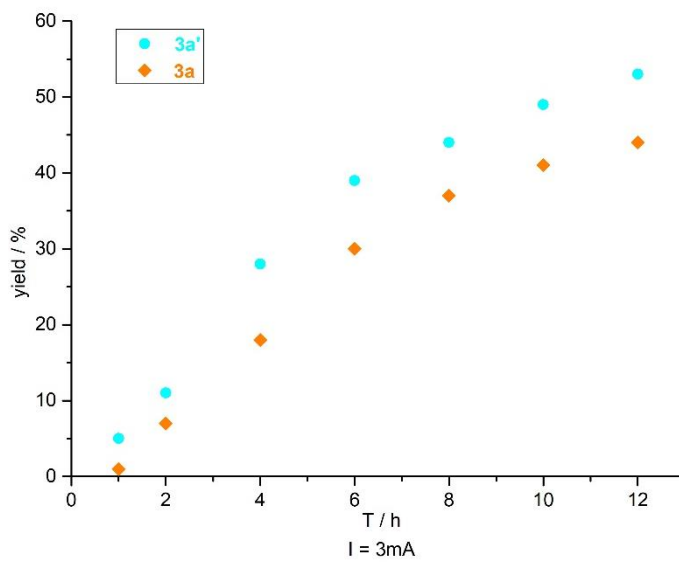

Figure S4 Kinetic plots at I = 3 mA

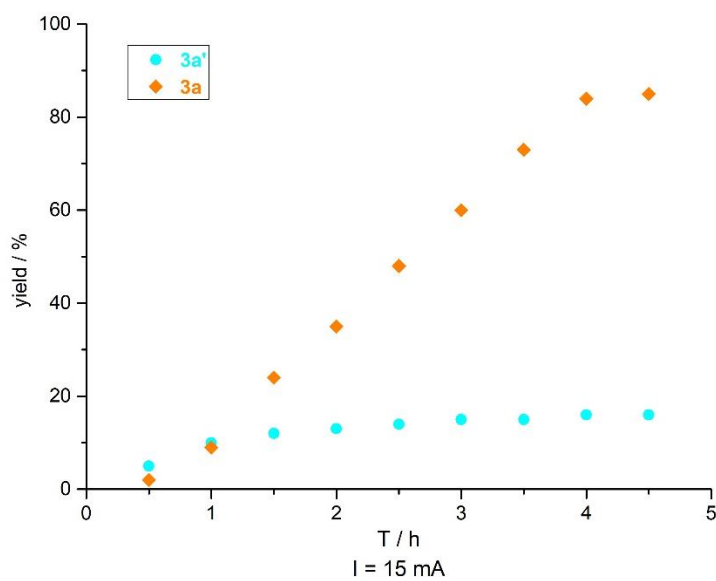

Figure S5 Kinetic plots at I = 15 mA

## Cyclic Voltammetry

Cyclic voltammograms in solvent (10 mL) by using glassy carbon as the working electrode, Pt wire as the counter electrode and Ag/AgCl as the reference electrode under N<sub>2</sub> at room temperature. DMA (10mL) containing 0.1 M <sup>n</sup>Bu<sub>4</sub>PF<sub>6</sub> was poured into the electro chemical cell in all experiments. The scan rate was 100 mV s<sup>-1</sup>.

### 1) Cathodic reduction

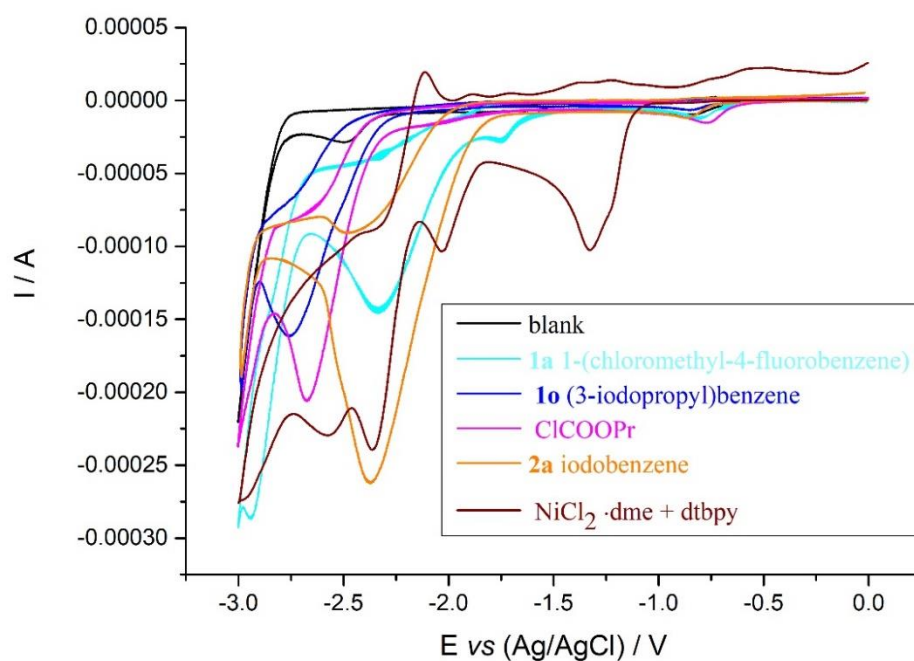

Figure S6: Cyclic voltammograms recorded on a glassy carbon electrode at 100 mVs<sup>-1</sup> in: (a) DMAc (10 mL), <sup>n</sup>Bu<sub>4</sub>PF<sub>6</sub> (1 mol); (b) **1a** (0.1 mmol), DMA (10 mL), <sup>n</sup>Bu<sub>4</sub>PF<sub>6</sub> (1 mol); (c) **1o** (0.1 mmol), DMA (10 mL), <sup>n</sup>Bu<sub>4</sub>PF<sub>6</sub> (1 mol); (d) ClCOOPr (0.1 mmol), DMA (10 mL), <sup>n</sup>Bu<sub>4</sub>PF<sub>6</sub> (1 mol); (e) **2a** (0.1 mmol), DMA (10 mL), <sup>n</sup>Bu<sub>4</sub>PF<sub>6</sub> (1 mol); (f) NiCl<sub>2</sub>·dme (0.05 mmol), dtbpy (0.15 mmol), DMA (10 mL), <sup>n</sup>Bu<sub>4</sub>PF<sub>6</sub> (1 mol).

### 2) Interaction between [Ni] cat. and **2a** iodobenzene

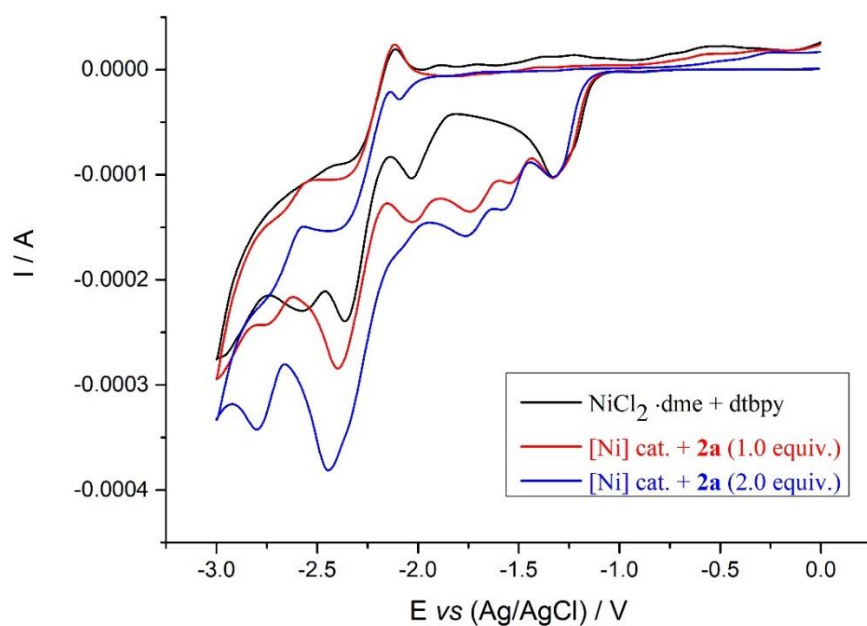

Figure S7: Cyclic voltammograms recorded on a glassy carbon electrode at  $100 \text{ mVs}^{-1}$  in: (a)  $\text{NiCl}_2 \cdot \text{dme}$  (0.05 mmol), dtbpy (0.15 mmol), DMA (10 mL),  ${}^n\text{Bu}_4\text{PF}_6$  (1 mol); (b)  $\text{NiCl}_2 \cdot \text{dme}$  (0.05 mmol), dtbpy (0.15 mmol),  $\mathbf{2a}$  (0.1 mmol), DMA (10 mL),  ${}^n\text{Bu}_4\text{PF}_6$  (1 mol); (c)  $\text{NiCl}_2 \cdot \text{dme}$  (0.05 mmol), dtbpy (0.15 mmol),  $\mathbf{2a}$  (0.2 mmol), DMA (10 mL),  ${}^n\text{Bu}_4\text{PF}_6$  (1 mol).

### 3) Interaction between $[\text{Ni}] \text{ cat.}$ and ClCOOEt

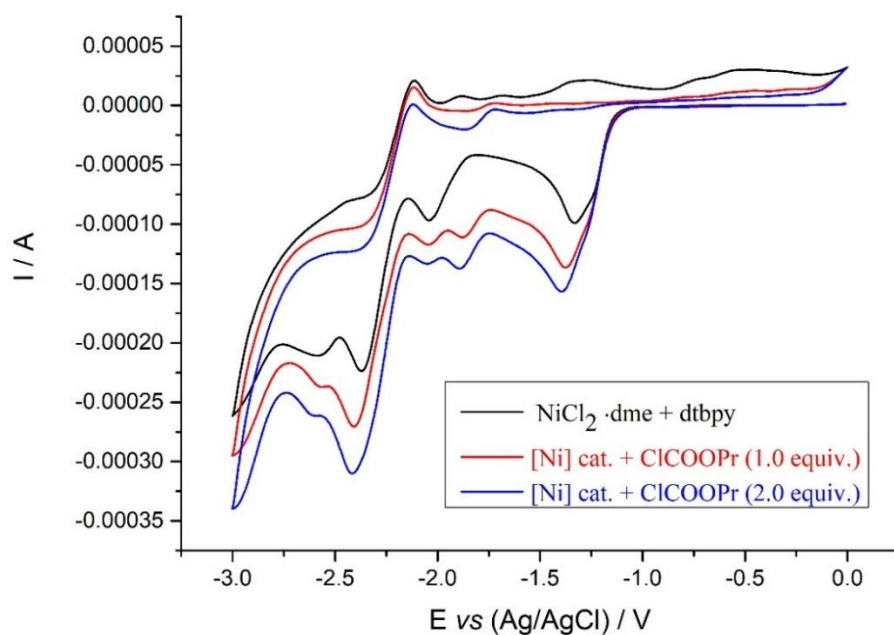

Figure S8: Cyclic voltammograms recorded on a glassy carbon electrode at 100 mVs<sup>-1</sup> in: (a) NiCl<sub>2</sub>·dme (0.05 mmol), dtbpy (0.15 mmol), DMA (10 mL), <sup>n</sup>Bu<sub>4</sub>PF<sub>6</sub> (1 mol); (b) NiCl<sub>2</sub>·dme (0.05 mmol), dtbpy (0.15 mmol), ClCOOPr (0.1 mmol), DMA (10 mL), <sup>n</sup>Bu<sub>4</sub>PF<sub>6</sub> (1 mol); (c) NiCl<sub>2</sub>·dme (0.05 mmol), dtbpy (0.15 mmol), ClCOOPr (0.2 mmol), DMA (10 mL), <sup>n</sup>Bu<sub>4</sub>PF<sub>6</sub> (1 mol).

#### 4) Interaction between [Ni] cat, 2a and ClCOOPr

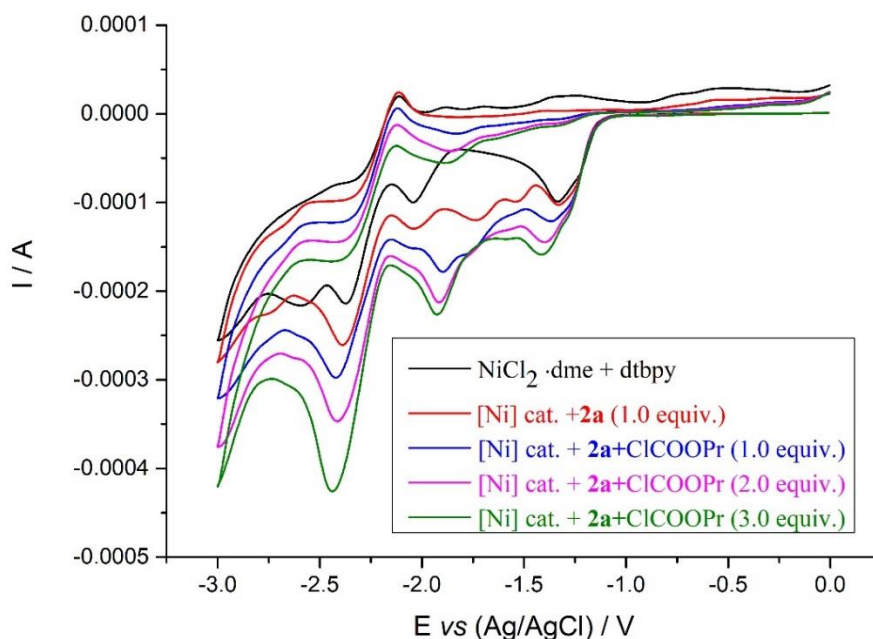

Figure S9: Cyclic voltammograms recorded on a glassy carbon electrode at 100 mVs<sup>-1</sup> in: (a) NiCl<sub>2</sub>·dme (0.05 mmol), dtbpy (0.15 mmol), DMA (10 mL), <sup>n</sup>Bu<sub>4</sub>PF<sub>6</sub> (1 mol); (b) NiCl<sub>2</sub>·dme (0.05 mmol), dtbpy (0.15 mmol), 2a (0.1 mmol), DMA (10 mL), <sup>n</sup>Bu<sub>4</sub>PF<sub>6</sub> (1 mol); (c) NiCl<sub>2</sub>·dme (0.05 mmol), dtbpy (0.15 mmol), 2a (0.1 mmol), ClCOOPr (0.1 mmol), DMA (10 mL), <sup>n</sup>Bu<sub>4</sub>PF<sub>6</sub> (1 mol); (d) NiCl<sub>2</sub>·dme (0.05 mmol), dtbpy (0.15 mmol), 2a (0.1 mmol), ClCOOPr (0.2 mmol), DMA (10 mL), <sup>n</sup>Bu<sub>4</sub>PF<sub>6</sub> (1 mol); (e) NiCl<sub>2</sub>·dme (0.05 mmol), dtbpy (0.15 mmol), 2a (0.1 mmol), ClCOOPr (0.3 mmol), DMA (10 mL), <sup>n</sup>Bu<sub>4</sub>PF<sub>6</sub> (1 mol).

#### 5) Interaction between [Ni] cat, ClCOOPr and 2a

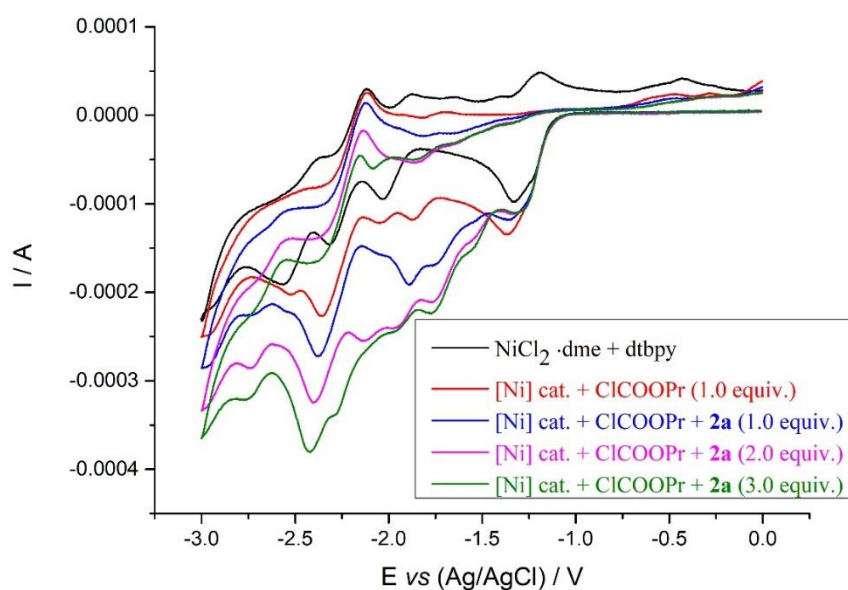

Figure S10: Cyclic voltammograms recorded on a glassy carbon electrode at  $100 \text{ mVs}^{-1}$  in: (a)  $\text{NiCl}_2 \cdot \text{dme}$  (0.05 mmol), dtbpy (0.15 mmol), DMA (10 mL),  ${}^n\text{Bu}_4\text{PF}_6$  (1 mol); (b)  $\text{NiCl}_2 \cdot \text{dme}$  (0.05 mmol), dtbpy (0.15 mmol), ClCOOPr (0.1 mmol), DMA (10 mL),  ${}^n\text{Bu}_4\text{PF}_6$  (1 mol); (c)  $\text{NiCl}_2 \cdot \text{dme}$  (0.05 mmol), dtbpy (0.15 mmol), ClCOOPr (0.1 mmol), **2a** (0.1 mmol), DMA (10 mL),  ${}^n\text{Bu}_4\text{PF}_6$  (1 mol); (d)  $\text{NiCl}_2 \cdot \text{dme}$  (0.05 mmol), dtbpy (0.15 mmol), ClCOOPr (0.1 mmol), **2a** (0.2 mmol) DMA (10 mL),  ${}^n\text{Bu}_4\text{PF}_6$  (1 mol); (e)  $\text{NiCl}_2 \cdot \text{dme}$  (0.05 mmol), dtbpy (0.15 mmol), ClCOOPr (0.1 mmol), **2a** (0.3 mmol), DMA (10 mL),  ${}^n\text{Bu}_4\text{PF}_6$  (1 mol).

## DFT Calculations

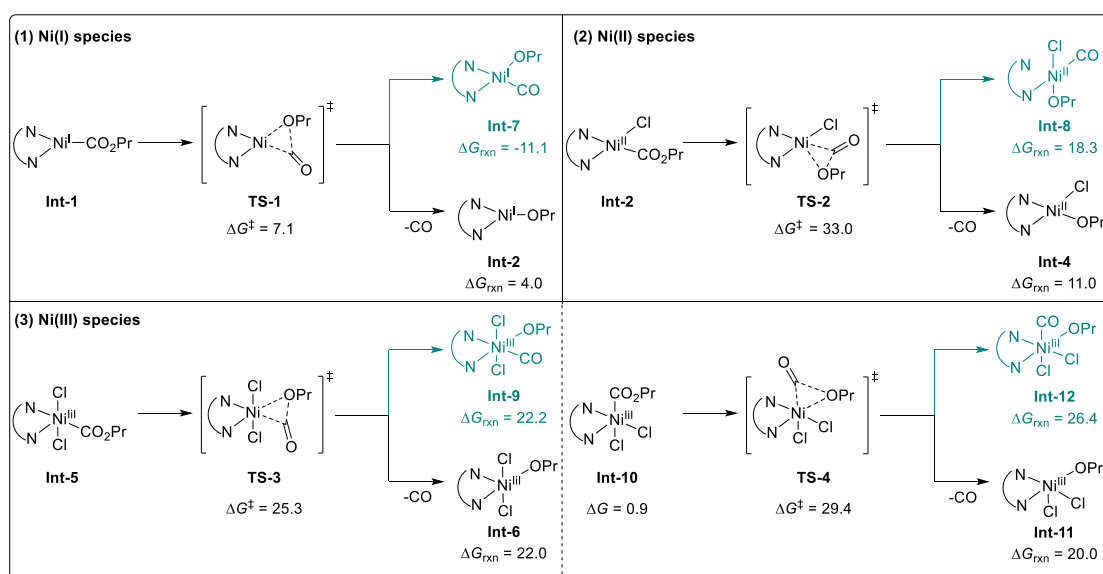

Figure S11. DFT-computed energy profiles of the decarbonylation. Calculations were performed using Gaussian 16 at the M06-L/SDD-6-311+G(d, p)/SMD(DMA)//B3LYP-D3(BJ)/LANL2DZ-6-31G(d) level of theory and the values are shown in kcal/mol.

## Computational Details

### a) Computational methods

All DFT calculations were carried out using the Gaussian 16 series of programs<sup>[3]</sup>. Geometries of intermediates and transition states were optimized using dispersion-corrected B3LYP-D3(BJ) functional<sup>[4]</sup> with a mixed basis set of LANL2DZ for Ni and 6-31G(d) for other atoms in the gas phase. Vibrational frequency calculations were performed for all stationary points to confirm if each optimized structure is a local minimum or a transition state structure. All optimized transition state structures have only one imaginary (negative) frequency, and all minima (reactants, products, and intermediates) have no imaginary frequencies. The M06-L functional<sup>[5]</sup> with a mixed basis set of SDD for Ni and 6-311+G(d,p) for other atoms was used for single-point energy calculations in solution. Solvation energy corrections were calculated in N, N-dimethylacetamide as solvent with the SMD continuum solvation model<sup>[6]</sup> based on the gas-phase optimized geometries.

### b) Cartesian coordinates (Å) and energies of optimized structures

#### Int-1

B3LYP-D3(BJ) SCF energy: -1286.44123339 a.u.

B3LYP-D3(BJ) enthalpy: -1285.915223 a.u.

B3LYP-D3(BJ) free energy: -1286.010599 a.u.

M06-L SCF energy in solution: -1288.18479433 a.u.

M06-L enthalpy in solution: -1287.658784 a.u.

M06-L free energy in solution: -1287.754160 a.u.

Cartesian coordinates

| ATOM | X         | Y         | Z         |
|------|-----------|-----------|-----------|
| C    | 0.457280  | 0.604630  | -0.000132 |
| C    | -1.802105 | 1.113823  | -0.000156 |
| C    | -1.533949 | 2.482672  | -0.000165 |
| C    | -0.211367 | 2.937193  | -0.000152 |
| C    | 0.791783  | 1.956375  | -0.000132 |
| C    | 1.444803  | -0.500507 | -0.000129 |
| C    | 1.740007  | -2.795184 | -0.000336 |
| C    | 3.125797  | -2.667589 | -0.000158 |
| C    | 3.706990  | -1.395151 | 0.000053  |
| C    | 2.823517  | -0.307253 | 0.000061  |
| H    | -2.809919 | 0.708883  | -0.000120 |

|    |           |           |           |
|----|-----------|-----------|-----------|
| H  | -2.366600 | 3.174679  | -0.000169 |
| H  | 1.833476  | 2.253991  | -0.000148 |
| H  | 1.269844  | -3.773583 | -0.000499 |
| H  | 3.730466  | -3.565413 | -0.000210 |
| H  | 3.216700  | 0.701916  | 0.000230  |
| N  | 0.904616  | -1.747182 | -0.000313 |
| N  | -0.830387 | 0.197330  | -0.000144 |
| Ni | -1.088266 | -1.838382 | -0.000245 |
| C  | 5.218998  | -1.157885 | 0.000295  |
| C  | 5.603236  | -0.354041 | -1.261702 |
| C  | 5.602831  | -0.354170 | 1.262495  |
| C  | 6.010356  | -2.475761 | 0.000335  |
| H  | 5.335738  | -0.902348 | -2.171384 |
| H  | 5.100529  | 0.617971  | -1.294404 |
| H  | 6.683798  | -0.172461 | -1.276381 |
| H  | 5.334995  | -0.902534 | 2.172046  |
| H  | 6.683392  | -0.172628 | 1.277569  |
| H  | 5.100133  | 0.617854  | 1.295113  |
| H  | 7.083484  | -2.258766 | 0.000448  |
| H  | 5.794250  | -3.079066 | 0.888837  |
| H  | 5.794433  | -3.079003 | -0.888259 |
| C  | 0.169692  | 4.420423  | -0.000119 |
| C  | 1.005752  | 4.726738  | 1.262088  |
| C  | 1.006264  | 4.726728  | -1.261974 |
| C  | -1.065987 | 5.334976  | -0.000370 |
| H  | 0.434198  | 4.511180  | 2.171256  |
| H  | 1.926109  | 4.134670  | 1.294944  |
| H  | 1.288329  | 5.785452  | 1.277908  |
| H  | 0.435131  | 4.511074  | -2.171381 |
| H  | 1.288754  | 5.785466  | -1.277723 |
| H  | 1.926705  | 4.134766  | -1.294387 |
| H  | -0.746664 | 6.382373  | -0.000333 |
| H  | -1.687189 | 5.177502  | -0.888742 |
| H  | -1.687553 | 5.177527  | 0.887743  |
| C  | -2.957618 | -2.328720 | -0.000204 |
| O  | -3.430686 | -3.455810 | -0.001059 |
| O  | -3.858708 | -1.240267 | 0.000938  |
| C  | -5.252273 | -1.571269 | 0.000689  |
| C  | -6.047714 | -0.273771 | 0.000487  |
| H  | -5.491035 | -2.180739 | 0.881488  |
| H  | -5.490685 | -2.180868 | -0.880101 |
| H  | -5.763449 | 0.317400  | 0.881299  |
| H  | -5.763136 | 0.317281  | -0.880297 |
| C  | -7.559030 | -0.520402 | 0.000246  |



|   |           |           |           |
|---|-----------|-----------|-----------|
| H | -8.118546 | 0.421866  | 0.000094  |
| H | -7.865988 | -1.091695 | -0.884256 |
| H | -7.866290 | -1.091580 | 0.884719  |

### TS-1

B3LYP-D3(BJ) SCF energy: -1286.43252526 a.u.

B3LYP-D3(BJ) enthalpy: -1285.908793 a.u.

B3LYP-D3(BJ) free energy: -1286.002969 a.u.

M06-L SCF energy in solution: -1288.17243171 a.u.

M06-L enthalpy in solution: -1287.648699 a.u.

M06-L free energy in solution: -1287.742875 a.u.

Imaginary frequency: -50.0659 cm<sup>-1</sup>

### Cartesian coordinates

| ATOM | X         | Y         | Z         |
|------|-----------|-----------|-----------|
| C    | -0.431855 | 0.758862  | -0.175778 |
| C    | 1.652664  | 1.734546  | -0.435163 |
| C    | 1.117747  | 3.015520  | -0.329496 |
| C    | -0.258611 | 3.182021  | -0.136711 |
| C    | -1.027823 | 2.011877  | -0.062269 |
| C    | -1.167098 | -0.526857 | -0.109918 |
| C    | -0.959964 | -2.827297 | -0.208334 |
| C    | -2.328931 | -3.005832 | -0.017767 |
| C    | -3.160855 | -1.891437 | 0.135728  |
| C    | -2.541688 | -0.634062 | 0.084909  |
| H    | 2.714749  | 1.565626  | -0.584187 |
| H    | 1.784231  | 3.865695  | -0.399120 |
| H    | -2.098843 | 2.082145  | 0.084500  |
| H    | -0.286030 | -3.670210 | -0.327937 |
| H    | -2.724757 | -4.013074 | 0.008902  |
| H    | -3.138011 | 0.263247  | 0.199136  |
| N    | -0.386225 | -1.622565 | -0.254287 |
| N    | 0.903721  | 0.628462  | -0.359948 |
| Ni   | 1.612232  | -1.228786 | -0.495819 |
| C    | -4.673402 | -1.992874 | 0.350675  |
| C    | -5.036771 | -1.332027 | 1.698813  |
| C    | -5.396595 | -1.256115 | -0.798396 |
| C    | -5.157286 | -3.451760 | 0.376115  |
| H    | -4.529901 | -1.834371 | 2.529755  |
| H    | -4.755565 | -0.274218 | 1.723103  |
| H    | -6.117577 | -1.394799 | 1.868553  |
| H    | -5.149466 | -1.704063 | -1.766907 |
| H    | -6.481879 | -1.317442 | -0.659537 |
| H    | -5.124119 | -0.196486 | -0.838288 |

|   |           |           |           |
|---|-----------|-----------|-----------|
| H | -6.240886 | -3.475639 | 0.531259  |
| H | -4.946132 | -3.966023 | -0.567786 |
| H | -4.693226 | -4.019188 | 1.190154  |
| C | -0.931563 | 4.551229  | -0.009158 |
| C | -1.974332 | 4.707835  | -1.138076 |
| C | -1.636535 | 4.641192  | 1.362431  |
| C | 0.079517  | 5.704355  | -0.114870 |
| H | -1.498030 | 4.642383  | -2.122237 |
| H | -2.748981 | 3.935865  | -1.087055 |
| H | -2.468211 | 5.683010  | -1.060587 |
| H | -0.916942 | 4.527046  | 2.180291  |
| H | -2.125731 | 5.615865  | 1.470033  |
| H | -2.403032 | 3.868063  | 1.478186  |
| H | -0.444236 | 6.660959  | -0.017937 |
| H | 0.833296  | 5.657231  | 0.678634  |
| H | 0.594808  | 5.705130  | -1.081568 |
| C | 2.994532  | -2.569991 | -0.559490 |
| O | 3.658746  | -3.531643 | -0.335432 |
| O | 3.788842  | -1.188950 | -0.781966 |
| C | 5.077618  | -1.092675 | -0.201503 |
| C | 5.033333  | -0.381801 | 1.152019  |
| H | 5.735598  | -0.548502 | -0.894917 |
| H | 5.485746  | -2.106112 | -0.080474 |
| H | 4.583367  | 0.612105  | 1.017576  |
| H | 4.357576  | -0.942595 | 1.810651  |
| C | 6.415794  | -0.250685 | 1.795945  |
| H | 7.099034  | 0.320848  | 1.154961  |
| H | 6.362997  | 0.259261  | 2.764668  |
| H | 6.867096  | -1.236426 | 1.961697  |

## CO

B3LYP-D3(BJ) SCF energy: -113.30764 a.u.

B3LYP-D3(BJ) enthalpy: -113.2993 a.u.

B3LYP-D3(BJ) free energy: -113.32174 a.u.

M06-L SCF energy in solution: -113.32564 a.u.

M06-L enthalpy in solution: -113.317298 a.u.

M06-L free energy in solution: -113.339741 a.u.

Cartesian coordinates

| ATOM | X        | Y        | Z         |
|------|----------|----------|-----------|
| C    | 0.000000 | 0.000000 | -0.650132 |
| O    | 0.000000 | 0.000000 | 0.487599  |

**Int-2**

B3LYP-D3(BJ) SCF energy: -1173.11029355 a.u.  
B3LYP-D3(BJ) enthalpy: -1172.596546 a.u.  
B3LYP-D3(BJ) free energy: -1172.686510 a.u.  
M06-L SCF energy in solution: -1174.83175090 a.u.  
M06-L enthalpy in solution: -1174.318003 a.u.  
M06-L free energy in solution: -1174.407967 a.u.

Cartesian coordinates

| ATOM | X         | Y         | Z         |
|------|-----------|-----------|-----------|
| C    | -0.973977 | -0.438279 | -0.174256 |
| C    | -1.347158 | -2.718215 | -0.347286 |
| C    | -2.709701 | -2.559541 | -0.132491 |
| C    | -3.240996 | -1.279211 | 0.086182  |
| C    | -2.330696 | -0.217533 | 0.058523  |
| C    | 0.041727  | 0.625214  | -0.237116 |
| C    | 2.287096  | 1.072183  | -0.586509 |
| C    | 2.089215  | 2.438055  | -0.422116 |
| C    | 0.805851  | 2.929949  | -0.140791 |
| C    | -0.219878 | 1.982660  | -0.050982 |
| H    | -0.914576 | -3.701293 | -0.504090 |
| H    | -3.340784 | -3.439189 | -0.132647 |
| H    | -2.681834 | 0.795506  | 0.215249  |
| H    | 3.271704  | 0.662525  | -0.787624 |
| H    | 2.940072  | 3.101447  | -0.510917 |
| H    | -1.231651 | 2.304452  | 0.165517  |
| N    | 1.295648  | 0.175119  | -0.496020 |
| N    | -0.479437 | -1.692184 | -0.366670 |
| Ni   | 1.487327  | -1.831177 | -0.578892 |
| C    | 0.500131  | 4.416494  | 0.063540  |
| C    | -0.527990 | 4.871177  | -0.995849 |
| C    | -0.088734 | 4.622831  | 1.476538  |
| C    | 1.758261  | 5.289481  | -0.072094 |
| H    | -0.134235 | 4.729981  | -2.008202 |
| H    | -1.465683 | 4.311335  | -0.918797 |
| H    | -0.760665 | 5.934027  | -0.863649 |
| H    | 0.621743  | 4.302802  | 2.246337  |
| H    | -0.316002 | 5.682664  | 1.638995  |
| H    | -1.015082 | 4.056687  | 1.617906  |
| H    | 1.493689  | 6.340840  | 0.081912  |
| H    | 2.517142  | 5.025786  | 0.672653  |
| H    | 2.206934  | 5.202874  | -1.067734 |
| C    | -4.727184 | -1.014716 | 0.341337  |
| C    | -4.892023 | -0.340248 | 1.721161  |
| C    | -5.270809 | -0.077254 | -0.759491 |

|   |           |           |           |
|---|-----------|-----------|-----------|
| C | -5.554471 | -2.310437 | 0.330290  |
| H | -4.509554 | -0.985386 | 2.519479  |
| H | -4.356420 | 0.613169  | 1.774028  |
| H | -5.951371 | -0.140674 | 1.919406  |
| H | -5.161117 | -0.532656 | -1.749653 |
| H | -6.334772 | 0.125098  | -0.591124 |
| H | -4.745554 | 0.883310  | -0.771307 |
| H | -6.607627 | -2.075318 | 0.516411  |
| H | -5.494805 | -2.821681 | -0.636793 |
| H | -5.227318 | -3.007107 | 1.109891  |
| O | 2.949954  | -2.873926 | -0.664558 |
| C | 4.011715  | -3.059117 | 0.206453  |
| C | 4.636466  | -1.745990 | 0.700579  |
| H | 4.807779  | -3.646226 | -0.292473 |
| H | 3.714243  | -3.650867 | 1.096454  |
| H | 4.939192  | -1.160955 | -0.179998 |
| H | 3.855232  | -1.165222 | 1.212122  |
| C | 5.834242  | -1.956508 | 1.630357  |
| H | 6.631439  | -2.517000 | 1.126270  |
| H | 6.259912  | -1.004367 | 1.968573  |
| H | 5.545190  | -2.526725 | 2.522194  |

### Int-3

B3LYP-D3(BJ) SCF energy: -1746.70699464 a.u.

B3LYP-D3(BJ) enthalpy: -1746.175844 a.u.

B3LYP-D3(BJ) free energy: -1746.271667 a.u.

M06-L SCF energy in solution: -1748.47402929 a.u.

M06-L enthalpy in solution: -1747.942879 a.u.

M06-L free energy in solution: -1748.038702 a.u.

### Cartesian coordinates

| ATOM | X         | Y         | Z         |
|------|-----------|-----------|-----------|
| C    | 0.770314  | 0.819678  | -0.151390 |
| C    | -1.171733 | 2.017189  | -0.559544 |
| C    | -0.503821 | 3.228363  | -0.403427 |
| C    | 0.859188  | 3.248492  | -0.097824 |
| C    | 1.486001  | 2.000491  | 0.014732  |
| C    | 1.381981  | -0.522951 | -0.097542 |
| C    | 0.986037  | -2.782212 | -0.405261 |
| C    | 2.312713  | -3.094164 | -0.113767 |
| C    | 3.217078  | -2.078979 | 0.212002  |
| C    | 2.715622  | -0.769312 | 0.214316  |
| H    | -2.220399 | 1.977698  | -0.825587 |
| H    | -1.068244 | 4.143222  | -0.529554 |

|    |           |           |           |
|----|-----------|-----------|-----------|
| H  | 2.547559  | 1.948124  | 0.221475  |
| H  | 0.244942  | -3.536808 | -0.649722 |
| H  | 2.617462  | -4.132397 | -0.141752 |
| H  | 3.369315  | 0.056986  | 0.464783  |
| N  | 0.528553  | -1.527679 | -0.398062 |
| N  | -0.563889 | 0.829581  | -0.418584 |
| C  | 4.685781  | -2.337122 | 0.557637  |
| C  | 5.580721  | -1.576888 | -0.446103 |
| C  | 4.962410  | -1.826313 | 1.989036  |
| C  | 5.040171  | -3.831586 | 0.494339  |
| H  | 5.396369  | -1.917224 | -1.470720 |
| H  | 5.404966  | -0.496703 | -0.412977 |
| H  | 6.637005  | -1.750750 | -0.212388 |
| H  | 4.333237  | -2.347132 | 2.718744  |
| H  | 6.011094  | -2.002354 | 2.253459  |
| H  | 4.769772  | -0.752680 | 2.083573  |
| H  | 6.096678  | -3.968012 | 0.747101  |
| H  | 4.450447  | -4.419200 | 1.206181  |
| H  | 4.883096  | -4.244009 | -0.508206 |
| C  | 1.664649  | 4.534809  | 0.094252  |
| C  | 2.280115  | 4.535355  | 1.511159  |
| C  | 2.792130  | 4.584806  | -0.960706 |
| C  | 0.791489  | 5.790328  | -0.061362 |
| H  | 1.498831  | 4.494235  | 2.277686  |
| H  | 2.949131  | 3.682583  | 1.665726  |
| H  | 2.863340  | 5.449979  | 1.665443  |
| H  | 2.379631  | 4.577460  | -1.975260 |
| H  | 3.380124  | 5.500999  | -0.836579 |
| H  | 3.475356  | 3.734307  | -0.868391 |
| H  | 1.405344  | 6.684064  | 0.090257  |
| H  | 0.350848  | 5.857222  | -1.061962 |
| H  | -0.018528 | 5.815080  | 0.675693  |
| C  | -3.148516 | -0.280011 | -0.650385 |
| O  | -3.623307 | 0.448241  | -1.506753 |
| O  | -3.851241 | -0.648414 | 0.446688  |
| C  | -5.229826 | -0.222253 | 0.489310  |
| C  | -5.848494 | -0.797169 | 1.751646  |
| H  | -5.740036 | -0.581384 | -0.410842 |
| H  | -5.273412 | 0.873728  | 0.479112  |
| H  | -5.739139 | -1.887827 | 1.729726  |
| H  | -5.281339 | -0.440842 | 2.620843  |
| Ni | -1.393174 | -0.932864 | -0.615770 |
| Cl | -2.197006 | -2.949708 | -0.996602 |
| C  | -7.324301 | -0.411898 | 1.888157  |

|   |           |           |          |
|---|-----------|-----------|----------|
| H | -7.910963 | -0.781459 | 1.038549 |
| H | -7.758674 | -0.832658 | 2.801277 |
| H | -7.450351 | 0.677110  | 1.929495 |

### TS-2

B3LYP-D3(BJ) SCF energy: -1746.64639030 a.u.

B3LYP-D3(BJ) enthalpy: -1746.118979 a.u.

B3LYP-D3(BJ) free energy: -1746.214322 a.u.

M06-L SCF energy in solution: -1748.41822158 a.u.

M06-L enthalpy in solution: -1747.890810 a.u.

M06-L free energy in solution: -1747.986153 a.u.

Imaginary frequency: -373.5490 cm<sup>-1</sup>

### Cartesian coordinates

| ATOM | X         | Y         | Z         |
|------|-----------|-----------|-----------|
| C    | 0.714486  | 0.834883  | -0.167411 |
| C    | -1.141249 | 2.233617  | -0.277282 |
| C    | -0.341370 | 3.358343  | -0.100192 |
| C    | 1.046157  | 3.229686  | 0.028979  |
| C    | 1.559621  | 1.925889  | 0.004603  |
| C    | 1.127544  | -0.573004 | -0.132190 |
| C    | 0.355883  | -2.759756 | -0.172359 |
| C    | 1.646927  | -3.252305 | -0.008439 |
| C    | 2.734561  | -2.377875 | 0.087454  |
| C    | 2.438303  | -1.010191 | 0.021107  |
| H    | -2.223763 | 2.268475  | -0.336579 |
| H    | -0.822493 | 4.326971  | -0.063483 |
| H    | 2.621552  | 1.757519  | 0.134563  |
| H    | -0.506945 | -3.408748 | -0.263276 |
| H    | 1.781418  | -4.325222 | 0.037928  |
| H    | 3.233820  | -0.278304 | 0.090480  |
| N    | 0.091068  | -1.447367 | -0.236004 |
| N    | -0.619465 | 1.002817  | -0.336452 |
| C    | 4.181720  | -2.844786 | 0.255665  |
| C    | 5.015882  | -2.334261 | -0.940260 |
| C    | 4.749255  | -2.263117 | 1.569540  |
| C    | 4.290716  | -4.377116 | 0.310948  |
| H    | 4.627763  | -2.728905 | -1.885343 |
| H    | 5.011146  | -1.241226 | -1.003993 |
| H    | 6.057247  | -2.658467 | -0.835641 |
| H    | 4.168121  | -2.605114 | 2.432633  |
| H    | 5.786836  | -2.587991 | 1.704937  |
| H    | 4.739852  | -1.168252 | 1.569020  |
| H    | 5.340069  | -4.664881 | 0.431563  |

|    |           |           |           |
|----|-----------|-----------|-----------|
| H  | 3.733566  | -4.793674 | 1.157113  |
| H  | 3.922810  | -4.843892 | -0.609158 |
| C  | 1.989039  | 4.421577  | 0.208169  |
| C  | 2.733237  | 4.277456  | 1.554386  |
| C  | 3.010527  | 4.431288  | -0.950743 |
| C  | 1.234103  | 5.760655  | 0.207037  |
| H  | 2.027615  | 4.257326  | 2.391766  |
| H  | 3.331080  | 3.361121  | 1.594905  |
| H  | 3.411905  | 5.125410  | 1.698645  |
| H  | 2.505078  | 4.526886  | -1.917701 |
| H  | 3.696269  | 5.278293  | -0.837755 |
| H  | 3.610934  | 3.515970  | -0.973175 |
| H  | 1.947181  | 6.582116  | 0.330408  |
| H  | 0.699248  | 5.924341  | -0.734761 |
| H  | 0.513366  | 5.821727  | 1.029598  |
| C  | -3.086047 | 0.198626  | -1.769069 |
| O  | -4.050274 | 0.390485  | -2.374908 |
| O  | -3.296974 | 0.578806  | 0.187852  |
| C  | -4.473503 | 0.070577  | 0.745312  |
| C  | -4.212216 | -0.630886 | 2.081786  |
| H  | -4.966953 | -0.641353 | 0.059541  |
| H  | -5.192368 | 0.895300  | 0.908918  |
| H  | -3.495766 | -1.440693 | 1.899176  |
| H  | -3.726951 | 0.082958  | 2.761920  |
| Ni | -1.638373 | -0.604460 | -0.587186 |
| Cl | -2.737029 | -2.519708 | -0.771130 |
| C  | -5.488162 | -1.188894 | 2.717077  |
| H  | -5.964499 | -1.923165 | 2.056052  |
| H  | -5.279594 | -1.686441 | 3.671478  |
| H  | -6.219325 | -0.393078 | 2.909567  |

#### Int-4

B3LYP-D3(BJ) SCF energy: -1633.36627581 a.u.

B3LYP-D3(BJ) enthalpy: -1632.847216 a.u.

B3LYP-D3(BJ) free energy: -1632.937445 a.u.

M06-L SCF energy in solution: -1635.11024918 a.u.

M06-L enthalpy in solution: -1634.591189 a.u.

M06-L free energy in solution: -1634.681418 a.u.

#### Cartesian coordinates

| ATOM | X         | Y        | Z        |
|------|-----------|----------|----------|
| C    | 0.375698  | 0.834618 | 0.000161 |
| C    | -1.770649 | 1.721775 | 0.000595 |
| C    | -1.270950 | 3.021258 | 0.000433 |

|    |           |           |           |
|----|-----------|-----------|-----------|
| C  | 0.110589  | 3.245524  | 0.000115  |
| C  | 0.932613  | 2.109684  | -0.000016 |
| C  | 1.136409  | -0.426033 | 0.000134  |
| C  | 0.964224  | -2.736106 | 0.000716  |
| C  | 2.349834  | -2.874478 | 0.000487  |
| C  | 3.173637  | -1.745165 | -0.000015 |
| C  | 2.524719  | -0.503079 | -0.000180 |
| H  | -2.826801 | 1.466900  | 0.000815  |
| H  | -1.973815 | 3.844324  | 0.000561  |
| H  | 2.009990  | 2.220533  | -0.000244 |
| H  | 0.292523  | -3.587089 | 0.001000  |
| H  | 2.764053  | -3.874428 | 0.000679  |
| H  | 3.105160  | 0.411375  | -0.000549 |
| N  | 0.359814  | -1.540939 | 0.000513  |
| N  | -0.964850 | 0.657454  | 0.000461  |
| C  | 4.702195  | -1.813991 | -0.000358 |
| C  | 5.237200  | -1.102644 | -1.263000 |
| C  | 5.237765  | -1.102145 | 1.261768  |
| C  | 5.214767  | -3.263208 | -0.000191 |
| H  | 4.864268  | -1.586022 | -2.172330 |
| H  | 4.939835  | -0.049402 | -1.294911 |
| H  | 6.332100  | -1.141471 | -1.278902 |
| H  | 4.865234  | -1.585163 | 2.171454  |
| H  | 6.332673  | -1.140968 | 1.277202  |
| H  | 4.940411  | -0.048892 | 1.293389  |
| H  | 6.309591  | -3.264019 | -0.000472 |
| H  | 4.883029  | -3.811051 | 0.888439  |
| H  | 4.882567  | -3.811411 | -0.888426 |
| C  | 0.736334  | 4.642542  | -0.000074 |
| C  | 1.612662  | 4.801623  | 1.262164  |
| C  | 1.612297  | 4.801459  | -1.262583 |
| C  | -0.327196 | 5.752480  | 0.000006  |
| H  | 1.013792  | 4.684780  | 2.171748  |
| H  | 2.420808  | 4.063648  | 1.293726  |
| H  | 2.068860  | 5.797736  | 1.278162  |
| H  | 1.013161  | 4.684527  | -2.171981 |
| H  | 2.068513  | 5.797561  | -1.278826 |
| H  | 2.420420  | 4.063465  | -1.294300 |
| H  | 0.164949  | 6.730456  | -0.000114 |
| H  | -0.966084 | 5.702780  | -0.888356 |
| H  | -0.965846 | 5.702882  | 0.888545  |
| Ni | -1.597424 | -1.200662 | 0.000391  |
| Cl | -2.141832 | -3.340205 | -0.000030 |
| O  | -3.272007 | -0.542451 | 0.000270  |



|   |           |           |           |
|---|-----------|-----------|-----------|
| C | -4.459033 | -1.286280 | -0.000236 |
| C | -5.638169 | -0.307242 | -0.000733 |
| H | -4.531494 | -1.941403 | 0.882157  |
| H | -4.530755 | -1.941395 | -0.882667 |
| H | -5.552639 | 0.342708  | 0.880811  |
| H | -5.552181 | 0.342380  | -0.882471 |
| C | -6.991538 | -1.022664 | -0.000949 |
| H | -7.824127 | -0.309562 | -0.001390 |
| H | -7.098891 | -1.662895 | -0.885077 |
| H | -7.099422 | -1.662432 | 0.883448  |

### Int-5

B3LYP-D3(BJ) SCF energy: -2206.92509840 a.u.

B3LYP-D3(BJ) enthalpy: -2206.391023 a.u.

B3LYP-D3(BJ) free energy: -2206.494080 a.u.

M06-L SCF energy in solution: -2208.72052145 a.u.

M06-L enthalpy in solution: -2208.186446 a.u.

M06-L free energy in solution: -2208.289503 a.u.

### Cartesian coordinates

| ATOM | X         | Y         | Z         |
|------|-----------|-----------|-----------|
| C    | 1.156148  | 0.759107  | -0.000003 |
| C    | -0.386452 | 2.488588  | -0.000028 |
| C    | 0.624686  | 3.447760  | -0.000013 |
| C    | 1.963898  | 3.050467  | 0.000063  |
| C    | 2.208481  | 1.670076  | 0.000025  |
| C    | 1.344696  | -0.709979 | -0.000049 |
| C    | 0.271819  | -2.759910 | -0.000179 |
| C    | 1.481682  | -3.448961 | -0.000148 |
| C    | 2.684534  | -2.735416 | -0.000058 |
| C    | 2.588530  | -1.337306 | -0.000006 |
| H    | -1.437243 | 2.755185  | -0.000062 |
| H    | 0.344956  | 4.493218  | -0.000044 |
| H    | 3.228077  | 1.306184  | 0.000048  |
| H    | -0.678483 | -3.283696 | -0.000243 |
| H    | 1.466078  | -4.530994 | -0.000215 |
| H    | 3.490576  | -0.738660 | 0.000057  |
| N    | 0.206472  | -1.430156 | -0.000125 |
| N    | -0.128034 | 1.180860  | -0.000023 |
| C    | 4.059971  | -3.407524 | -0.000014 |
| C    | 4.834021  | -2.968333 | -1.262676 |
| C    | 4.833904  | -2.968361 | 1.262735  |
| C    | 3.953803  | -4.941098 | -0.000022 |
| H    | 4.298880  | -3.261884 | -2.172058 |

|    |           |           |           |
|----|-----------|-----------|-----------|
| H  | 4.981497  | -1.883991 | -1.294277 |
| H  | 5.822514  | -3.440820 | -1.278693 |
| H  | 4.298675  | -3.261915 | 2.172066  |
| H  | 5.822389  | -3.440860 | 1.278851  |
| H  | 4.981381  | -1.884018 | 1.294368  |
| H  | 4.958081  | -5.377049 | 0.000016  |
| H  | 3.431713  | -5.312073 | 0.888696  |
| H  | 3.431745  | -5.312096 | -0.888745 |
| C  | 3.135562  | 4.035282  | 0.000058  |
| C  | 3.992776  | 3.796464  | 1.262781  |
| C  | 3.992830  | 3.796347  | -1.262608 |
| C  | 2.660687  | 5.497286  | -0.000034 |
| H  | 3.402394  | 3.952006  | 2.172051  |
| H  | 4.398229  | 2.780003  | 1.294626  |
| H  | 4.837592  | 4.494082  | 1.278908  |
| H  | 3.402532  | 3.951961  | -2.171915 |
| H  | 4.837737  | 4.493866  | -1.278667 |
| H  | 4.398203  | 2.779851  | -1.294400 |
| H  | 3.529188  | 6.163905  | -0.000077 |
| H  | 2.063923  | 5.730175  | -0.888587 |
| H  | 2.063942  | 5.730292  | 0.888505  |
| C  | -3.218930 | 0.606952  | 0.000029  |
| O  | -3.337842 | 1.804773  | 0.000039  |
| O  | -4.180303 | -0.298953 | 0.000048  |
| C  | -5.543080 | 0.219272  | 0.000014  |
| C  | -6.477524 | -0.974451 | 0.000052  |
| H  | -5.670186 | 0.844441  | -0.889387 |
| H  | -5.670213 | 0.844529  | 0.889355  |
| H  | -6.263375 | -1.590290 | -0.881252 |
| H  | -6.263370 | -1.590211 | 0.881420  |
| Cl | -1.864999 | -0.601643 | -2.230575 |
| Ni | -1.529745 | -0.338140 | 0.000013  |
| Cl | -1.864873 | -0.602077 | 2.230561  |
| C  | -7.944997 | -0.534789 | 0.000040  |
| H  | -8.181200 | 0.066759  | -0.885803 |
| H  | -8.610538 | -1.403914 | 0.000089  |
| H  | -8.181190 | 0.066852  | 0.885822  |

### TS-3

B3LYP-D3(BJ) SCF energy: -2206.87357239 a.u.

B3LYP-D3(BJ) enthalpy: -2206.343053 a.u.

B3LYP-D3(BJ) free energy: -2206.444887 a.u.

M06-L SCF energy in solution: -2208.67782147 a.u.

M06-L enthalpy in solution: -2208.147302 a.u.

M06-L free energy in solution: -2208.249136 a.u.

Imaginary frequency: -177.2754 cm<sup>-1</sup>

Cartesian coordinates

| ATOM | X         | Y         | Z         |
|------|-----------|-----------|-----------|
| C    | -1.292784 | -0.275327 | 0.032325  |
| C    | -1.301515 | -2.583825 | 0.185187  |
| C    | -2.675310 | -2.637971 | -0.035966 |
| C    | -3.394184 | -1.456298 | -0.241172 |
| C    | -2.664158 | -0.260224 | -0.199967 |
| C    | -0.448456 | 0.933554  | 0.119605  |
| C    | 1.715574  | 1.695920  | 0.492148  |
| C    | 1.301726  | 3.024285  | 0.443196  |
| C    | -0.044536 | 3.325488  | 0.211558  |
| C    | -0.920302 | 2.240298  | 0.058681  |
| H    | -0.718642 | -3.485290 | 0.336852  |
| H    | -3.161536 | -3.604582 | -0.049573 |
| H    | -3.168580 | 0.685715  | -0.353672 |
| H    | 2.743532  | 1.408221  | 0.682733  |
| H    | 2.037827  | 3.803377  | 0.590870  |
| H    | -1.977100 | 2.417450  | -0.096713 |
| N    | 0.864640  | 0.689760  | 0.313464  |
| N    | -0.630680 | -1.435985 | 0.217450  |
| C    | -0.582442 | 4.756418  | 0.136935  |
| C    | -1.236664 | 4.974278  | -1.245521 |
| C    | -1.636590 | 4.955532  | 1.248681  |
| C    | 0.528892  | 5.802102  | 0.322923  |
| H    | -0.508698 | 4.829831  | -2.050948 |
| H    | -2.069257 | 4.284383  | -1.416697 |
| H    | -1.628350 | 5.995035  | -1.316323 |
| H    | -1.197211 | 4.794151  | 2.238776  |
| H    | -2.030616 | 5.977147  | 1.210471  |
| H    | -2.481143 | 4.267688  | 1.138866  |
| H    | 0.099613  | 6.806881  | 0.255458  |
| H    | 1.010741  | 5.713555  | 1.302668  |
| H    | 1.299145  | 5.718256  | -0.451514 |
| C    | -4.901852 | -1.424237 | -0.502214 |
| C    | -5.586164 | -0.593807 | 0.606196  |
| C    | -5.158544 | -0.768256 | -1.877137 |
| C    | -5.516948 | -2.832957 | -0.509206 |
| H    | -5.409423 | -1.035581 | 1.592673  |
| H    | -5.219523 | 0.437581  | 0.628560  |
| H    | -6.667726 | -0.560213 | 0.434203  |
| H    | -4.672977 | -1.335266 | -2.678413 |

|    |           |           |           |
|----|-----------|-----------|-----------|
| H  | -6.234611 | -0.737611 | -2.081325 |
| H  | -4.781715 | 0.258909  | -1.916092 |
| H  | -6.592690 | -2.760880 | -0.699137 |
| H  | -5.083371 | -3.461349 | -1.294753 |
| H  | -5.383826 | -3.339171 | 0.453134  |
| C  | 2.237274  | -2.830005 | 0.716230  |
| O  | 2.691429  | -3.861908 | 0.886066  |
| O  | 3.384035  | -1.012562 | 0.604321  |
| C  | 4.250318  | -1.092522 | -0.500675 |
| C  | 4.417510  | 0.246545  | -1.220818 |
| H  | 3.856087  | -1.813289 | -1.233408 |
| H  | 5.219330  | -1.476854 | -0.143207 |
| H  | 3.430250  | 0.567440  | -1.569701 |
| H  | 4.787559  | 0.996772  | -0.508270 |
| Cl | 1.413912  | -1.588992 | -2.005182 |
| Ni | 1.397986  | -1.193031 | 0.396596  |
| Cl | 1.142681  | -1.350724 | 2.793702  |
| C  | 5.375238  | 0.127457  | -2.408746 |
| H  | 4.987068  | -0.583130 | -3.147245 |
| H  | 5.506447  | 1.093042  | -2.909115 |
| H  | 6.365778  | -0.221520 | -2.091650 |

### Int-6

B3LYP-D3(BJ) SCF energy: -2093.55692492 a.u.

B3LYP-D3(BJ) enthalpy: -2093.036044 a.u.

B3LYP-D3(BJ) free energy: -2093.133701 a.u.

M06-L SCF energy in solution: -2095.33793851 a.u.

M06-L enthalpy in solution: -2094.817058 a.u.

M06-L free energy in solution: -2094.914715 a.u.

### Cartesian coordinates

| ATOM | X         | Y         | Z         |
|------|-----------|-----------|-----------|
| C    | -1.174759 | -0.265551 | 0.022518  |
| C    | -1.368325 | -2.571894 | 0.180945  |
| C    | -2.743412 | -2.513698 | -0.023426 |
| C    | -3.368100 | -1.277127 | -0.217802 |
| C    | -2.544477 | -0.143600 | -0.191134 |
| C    | -0.233841 | 0.872867  | 0.085398  |
| C    | 1.988024  | 1.462788  | 0.412476  |
| C    | 1.685888  | 2.818623  | 0.307364  |
| C    | 0.366929  | 3.223317  | 0.075727  |
| C    | -0.598169 | 2.210556  | -0.029756 |
| H    | -0.851053 | -3.512544 | 0.329625  |
| H    | -3.305921 | -3.437929 | -0.028690 |

|    |           |           |           |
|----|-----------|-----------|-----------|
| H  | -2.973925 | 0.839630  | -0.337209 |
| H  | 2.988996  | 1.093764  | 0.603649  |
| H  | 2.486558  | 3.539066  | 0.411710  |
| H  | -1.636520 | 2.469613  | -0.194857 |
| N  | 1.052251  | 0.524243  | 0.291718  |
| N  | -0.610774 | -1.477326 | 0.203373  |
| C  | -0.049939 | 4.690454  | -0.054160 |
| C  | -0.690578 | 4.908938  | -1.442873 |
| C  | -1.078453 | 5.020114  | 1.050520  |
| C  | 1.145565  | 5.646067  | 0.089151  |
| H  | 0.018891  | 4.673402  | -2.243372 |
| H  | -1.578937 | 4.285223  | -1.585738 |
| H  | -0.995930 | 5.955389  | -1.552782 |
| H  | -0.649011 | 4.862034  | 2.045478  |
| H  | -1.386701 | 6.068600  | 0.972546  |
| H  | -1.977652 | 4.400882  | 0.969670  |
| H  | 0.800797  | 6.680011  | -0.013399 |
| H  | 1.625083  | 5.552894  | 1.069589  |
| H  | 1.901004  | 5.470566  | -0.684518 |
| C  | -4.873007 | -1.124270 | -0.451016 |
| C  | -5.467460 | -0.244174 | 0.670918  |
| C  | -5.102686 | -0.446883 | -1.820304 |
| C  | -5.598818 | -2.479315 | -0.447073 |
| H  | -5.306432 | -0.700185 | 1.653509  |
| H  | -5.020266 | 0.755025  | 0.686133  |
| H  | -6.546185 | -0.125323 | 0.520287  |
| H  | -4.680292 | -1.049482 | -2.631451 |
| H  | -6.176528 | -0.329702 | -2.003520 |
| H  | -4.645918 | 0.547084  | -1.866033 |
| H  | -6.668563 | -2.320950 | -0.617428 |
| H  | -5.231398 | -3.139342 | -1.240401 |
| H  | -5.489368 | -2.995979 | 0.512611  |
| O  | 3.212864  | -1.343702 | 0.833626  |
| C  | 4.244022  | -1.747919 | -0.012863 |
| C  | 4.624335  | -0.727053 | -1.084469 |
| H  | 4.022732  | -2.723011 | -0.470736 |
| H  | 5.102060  | -1.922710 | 0.665148  |
| H  | 3.730777  | -0.508580 | -1.678802 |
| H  | 4.932175  | 0.206653  | -0.592493 |
| Cl | 1.587637  | -2.336372 | -1.613560 |
| Ni | 1.377066  | -1.474206 | 0.494867  |
| Cl | 0.918855  | -1.678859 | 2.744483  |
| C  | 5.745434  | -1.238418 | -1.992128 |
| H  | 5.430967  | -2.144863 | -2.522426 |

|   |          |           |           |
|---|----------|-----------|-----------|
| H | 6.022552 | -0.491430 | -2.743884 |
| H | 6.647522 | -1.482836 | -1.416898 |

## Analytical Data of Substrates and Products

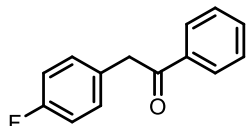

**2-(4-fluorophenyl)-1-phenylethan-1-one**<sup>[7]</sup> Light yellow solid (83.5 mg, 78% yield). The product was purified by silica gel column chromatography, using petroleum ether /EA = 30/1 (v/v) as an eluent.

<sup>1</sup>H NMR (400 MHz, CDCl<sub>3</sub>) δ 8.06 – 8.02 (m, 2H), 7.63 – 7.59 (m, 1H), 7.53 – 7.49 (m, 2H), 7.29 – 7.23 (m, 2H), 7.03 – 6.09 (m, 2H), 4.30 (s, 2H).

<sup>13</sup>C NMR (101 MHz, CDCl<sub>3</sub>) δ 197.5, 161.9 (d, *J* = 245.2 Hz), 136.4, 133.4, 131.1 (d, *J* = 8.0 Hz), 130.2 (d, *J* = 3.3 Hz), 128.7, 128.5, 115.5 (d, *J* = 21.5 Hz), 44.5.

<sup>19</sup>F NMR (377 MHz, CDCl<sub>3</sub>) δ -115.93.

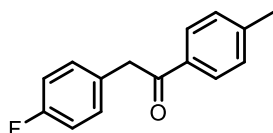

**2-(4-fluorophenyl)-1-(p-tolyl)ethan-1-one**<sup>[8]</sup> White solid (94.7 mg, 83% yield). The product was purified by silica gel column chromatography, using petroleum ether /EA = 30/1 (v/v) as an eluent.

<sup>1</sup>H NMR (400 MHz, CDCl<sub>3</sub>) δ 7.96 – 7.93 (m, 2H), 7.31 – 7.24 (m, 4H), 7.08 – 7.02 (m, 2H), 4.27 (s, 2H), 2.45 (s, 3H).

<sup>13</sup>C NMR (101 MHz, CDCl<sub>3</sub>) δ 197.1, 161.9 (d, *J* = 245.0 Hz), 144.2, 134.0, 131.0 (d, *J* = 8.0 Hz), 130.4 (d, *J* = 3.3 Hz), 129.4, 128.7, 115.5 (d, *J* = 21.5 Hz), 44.4, 21.7.

<sup>19</sup>F NMR (377 MHz, CDCl<sub>3</sub>) δ -116.07.

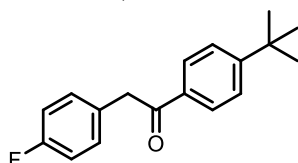

**1-(4-(tert-butyl)phenyl)-2-(4-fluorophenyl)ethan-1-one** White solid (110.7 mg, 82% yield). The product was purified by silica gel column chromatography, using petroleum ether /EA = 30/1 (v/v) as an eluent.

<sup>1</sup>H NMR (400 MHz, CDCl<sub>3</sub>) δ 8.01 – 7.98 (m, 2H), 7.54 – 7.51 (m, 2H), 7.30 – 7.25 (m, 2H), 7.07 – 7.03 (m, 2H), 4.28 (s, 2H), 1.38 (s, 9H).

<sup>13</sup>C NMR (101 MHz, CDCl<sub>3</sub>) δ 197.1, 161.9 (d, *J* = 245.0 Hz), 157.1, 133.9, 131.0 (d, *J* = 8.0 Hz), 130.4 (d, *J* = 3.3 Hz), 128.6, 125.7, 115.5 (d, *J* = 21.3 Hz), 44.5, 35.2, 31.1.

<sup>19</sup>F NMR (377 MHz, CDCl<sub>3</sub>) δ -116.05.

HRMS (ESI) *m/z*: [M + Na]<sup>+</sup> Calcd for C<sub>18</sub>H<sub>19</sub>FN<sub>1</sub>O<sup>+</sup> 293.1312; Found 293.1310.

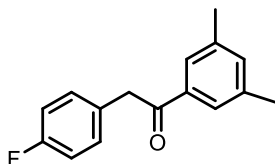

**1-(3,5-dimethylphenyl)-2-(4-fluorophenyl)ethan-1-one** Light yellow oil (92.1 mg, 76% yield). The product was purified by silica gel column chromatography, using petroleum ether /EA = 30/1 (v/v) as an eluent.

$^1\text{H}$  NMR (400 MHz,  $\text{CDCl}_3$ )  $\delta$  7.66 (d,  $J = 1.7$  Hz, 2H), 7.28 – 7.24 (m, 3H), 7.08 – 7.04 (m, 2H), 4.28 (s, 2H), 2.42 (s, 6H).

$^{13}\text{C}$  NMR (101 MHz,  $\text{CDCl}_3$ )  $\delta$  197.8, 161.9 (d,  $J = 245.0$  Hz), 138.4, 136.7, 135.0, 131.1 (d,  $J = 7.9$  Hz), 130.4 (d,  $J = 3.3$  Hz), 126.3, 115.5 (d,  $J = 21.4$  Hz), 44.5, 21.3.

$^{19}\text{F}$  NMR (377 MHz,  $\text{CDCl}_3$ )  $\delta$  -116.07.

HRMS (ESI)  $m/z$ :  $[\text{M} + \text{Na}]^+$  Calcd for  $\text{C}_{16}\text{H}_{15}\text{FNaO}^+$  265.0999; Found 265.0997.

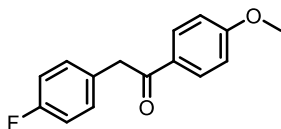

**2-(4-fluorophenyl)-1-(4-methoxyphenyl)ethan-1-one**<sup>[9]</sup> Light yellow oil (107.4 mg, 88% yield). The product was purified by silica gel column chromatography, using petroleum ether /EA = 20/1 (v/v) as an eluent.

$^1\text{H}$  NMR (400 MHz,  $\text{CDCl}_3$ )  $\delta$  8.03 – 8.01 (m, 2H), 7.27 – 7.23 (m, 2H), 7.06 – 7.02 (m, 2H), 6.98 – 6.96 (m, 2H), 4.24 (s, 2H), 3.90 (s, 3H).

$^{13}\text{C}$  NMR (101 MHz,  $\text{CDCl}_3$ )  $\delta$  196.0, 163.7, 161.9 (d,  $J = 245.0$  Hz), 131.0 (d,  $J = 8.0$  Hz), 130.9, 130.6 (d,  $J = 3.3$  Hz), 129.5, 115.5 (d,  $J = 21.4$  Hz), 113.9, 55.5, 44.3.

$^{19}\text{F}$  NMR (377 MHz,  $\text{CDCl}_3$ )  $\delta$  -116.15.

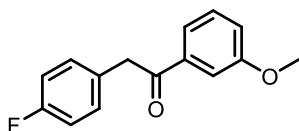

**2-(4-fluorophenyl)-1-(3-methoxyphenyl)ethan-1-one** Yellow oil (74.6 mg, 61% yield). The product was purified by silica gel column chromatography, using petroleum ether /EA = 20/1 (v/v) as an eluent.

$^1\text{H}$  NMR (400 MHz,  $\text{CDCl}_3$ )  $\delta$  7.63 (ddd,  $J = 7.7, 1.6, 1.0$  Hz, 1H), 7.55 (dd,  $J = 2.7, 1.6$  Hz, 1H), 7.41 (t,  $J = 7.9$  Hz, 1H), 7.29 – 7.22 (m, 2H), 7.15 (ddd,  $J = 8.2, 2.7, 1.0$  Hz, 1H), 7.08 – 7.02 (m, 2H), 4.28 (s, 2H), 3.88 (s, 3H).

$^{13}\text{C}$  NMR (101 MHz,  $\text{CDCl}_3$ )  $\delta$  197.3, 161.9 (d,  $J = 245.1$  Hz), 159.9, 137.8, 131.1 (d,  $J = 8.0$  Hz), 130.2 (d,  $J = 3.4$  Hz), 129.7, 121.2, 119.7, 115.5 (d,  $J = 21.3$  Hz), 112.9, 55.4, 44.6.

$^{19}\text{F}$  NMR (376 MHz,  $\text{CDCl}_3$ )  $\delta$  -115.97.

HRMS (ESI)  $m/z$ :  $[\text{M} + \text{Na}]^+$  Calcd for  $\text{C}_{15}\text{H}_{13}\text{FNaO}_2^+$  267.0792; Found 267.0789.

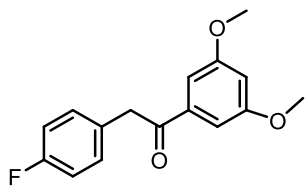

**1-(3,5-dimethoxyphenyl)-2-(4-fluorophenyl)ethan-1-one** Yellow oil (97.3 mg, 71% yield). The product was purified by silica gel column chromatography, using petroleum ether /EA = 20/1 (v/v) as an eluent.

$^1\text{H}$  NMR (400 MHz,  $\text{CDCl}_3$ )  $\delta$  7.26 – 7.23 (m, 2H), 7.16 (d,  $J = 2.3$  Hz, 2H), 7.07 – 7.01 (m, 2H), 6.68 (t,  $J = 2.3$  Hz, 1H), 4.24 (s, 2H), 3.85 (s, 6H).

$^{13}\text{C}$  NMR (101 MHz,  $\text{CDCl}_3$ )  $\delta$  197.14, 161.9 (d,  $J = 245.1$  Hz), 160.9, 138.4, 131.0 (d,  $J = 8.0$  Hz), 130.2 (d,  $J = 3.3$  Hz), 115.5 (d,  $J = 21.5$  Hz), 106.4, 105.4, 55.6, 44.6.

$^{19}\text{F}$  NMR (377 MHz,  $\text{CDCl}_3$ )  $\delta$  -115.93.

HRMS (ESI)  $m/z$ :  $[\text{M} + \text{Na}]^+$  Calcd for  $\text{C}_{16}\text{H}_{15}\text{FNaO}_3^+$  297.0897; Found 297.0902.

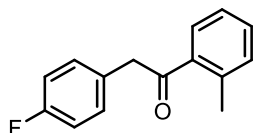

**2-(4-fluorophenyl)-1-(o-tolyl)ethan-1-one** Light yellow oil (44.5 mg, 39% yield). The product was purified by silica gel column chromatography, using petroleum ether /EA = 30/1 (v/v) as an eluent.

$^1\text{H}$  NMR (400 MHz,  $\text{CDCl}_3$ )  $\delta$  7.75 (dd,  $J = 7.7, 1.4$  Hz, 1H), 7.41 (td,  $J = 7.5, 1.4$  Hz, 1H), 7.33 – 7.27 (m, 2H), 7.24 – 7.21 (m, 2H), 7.07 – 7.02 (m, 2H), 4.22 (s, 2H), 2.48 (s, 3H).

$^{13}\text{C}$  NMR (101 MHz,  $\text{CDCl}_3$ )  $\delta$  201.2, 161.9 (d,  $J = 245.3$  Hz), 138.6, 137.4, 132.1, 131.5, 131.1 (d,  $J = 8.0$  Hz), 130.1 (d,  $J = 3.5$  Hz), 128.6, 125.7, 115.5 (d,  $J = 21.4$  Hz), 47.4, 21.3.

$^{19}\text{F}$  NMR (376 MHz,  $\text{CDCl}_3$ )  $\delta$  -116.61.

HRMS (ESI)  $m/z$ :  $[\text{M} + \text{Na}]^+$  Calcd for  $\text{C}_{15}\text{H}_{13}\text{FNaO}^+$  251.0842; Found 251.0852.

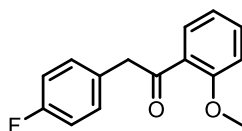

**2-(4-fluorophenyl)-1-(2-methoxyphenyl)ethan-1-one** Light yellow oil (51.2 mg, 42% yield). The product was purified by silica gel column chromatography, using petroleum ether /EA = 20/1 (v/v) as an eluent.

$^1\text{H}$  NMR (400 MHz,  $\text{CDCl}_3$ )  $\delta$  7.71 (dd,  $J = 7.7, 1.8$  Hz, 1H), 7.50 (ddd,  $J = 8.4, 7.3, 1.9$  Hz, 1H), 7.25 – 7.19 (m, 2H), 7.05 – 6.99 (m, 4H), 4.31 (s, 2H), 3.96 (s, 3H).

$^{13}\text{C}$  NMR (101 MHz,  $\text{CDCl}_3$ )  $\delta$  199.9, 161.8 (d,  $J = 244.4$  Hz), 158.4, 133.7, 131.2 (d,  $J = 7.8$  Hz), 130.9 (d,  $J = 3.3$  Hz), 130.7, 128.0, 120.8, 115.2 (d,  $J = 21.3$  Hz), 111.5, 55.5, 49.3.

$^{19}\text{F}$  NMR (376 MHz,  $\text{CDCl}_3$ )  $\delta$  -116.01.

HRMS (ESI)  $m/z$ :  $[\text{M} + \text{Na}]^+$  Calcd for  $\text{C}_{15}\text{H}_{13}\text{FNaO}_2^+$  267.0792; Found 267.0790.

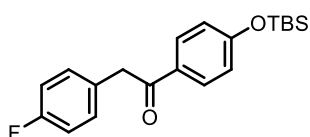



**1-(4-((tert-butyldimethylsilyl)oxy)phenyl)-2-(4-fluorophenyl)ethan-1-one** White solid (134.2 mg, 78% yield). mp 140.6–141.3 °C. The product was purified by silica gel column chromatography, using petroleum ether /EA = 20/1 (v/v) as an eluent.

<sup>1</sup>H NMR (400 MHz, CDCl<sub>3</sub>) δ 7.98 – 7.95 (m, 2H), 7.28 – 7.23 (m, 2H), 7.07 – 7.01 (m, 2H), 6.93 – 6.89 (m, 2H), 4.24 (s, 2H), 1.02 (s, 9H), 0.27 (s, 6H).

<sup>13</sup>C NMR (101 MHz, CDCl<sub>3</sub>) δ 196.1, 161.9 (d, *J* = 244.9 Hz), 160.5, 131.0 (d, *J* = 8.0 Hz), 130.8, 130.5 (d, *J* = 3.3 Hz), 130.0, 120.0, 115.5 (d, *J* = 21.3 Hz), 44.2, 25.6, 18.3, -4.3.

<sup>19</sup>F NMR (377 MHz, CDCl<sub>3</sub>) δ -116.17.

HRMS (ESI) *m/z*: [M + Na]<sup>+</sup> Calcd for C<sub>20</sub>H<sub>25</sub>FNaO<sub>2</sub>Si<sup>+</sup> 367.1500; Found 367.1503.

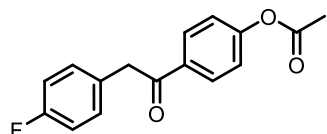

**4-(2-(4-fluorophenyl)acetyl)phenyl acetate** Yellow solid (103.4 mg, 76% yield). mp 114.7–115.3 °C. The product was purified by silica gel column chromatography, using petroleum ether /EA = 8/1 (v/v) as an eluent.

<sup>1</sup>H NMR (400 MHz, CDCl<sub>3</sub>) δ 8.09 – 8.05 (m, 2H), 7.26 – 7.22 (m, 4H), 7.08 – 7.02 (m, 2H), 4.27 (s, 2H), 2.35 (s, 3H).

<sup>13</sup>C NMR (101 MHz, CDCl<sub>3</sub>) δ 196.2, 168.9, 162.0 (d, *J* = 245.3 Hz), 154.5, 134.0, 131.1 (d, *J* = 8.0 Hz), 130.2, 130.0 (d, *J* = 3.3 Hz), 121.94, 115.6 (d, *J* = 21.4 Hz), 44.5, 21.2.

<sup>19</sup>F NMR (377 MHz, CDCl<sub>3</sub>) δ -115.82.

HRMS (ESI) *m/z*: [M + H]<sup>+</sup> Calcd for C<sub>16</sub>H<sub>14</sub>FO<sub>3</sub><sup>+</sup> 273.0921; Found 273.0915.

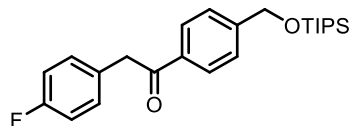

**2-(4-fluorophenyl)-1-(4(((triisopropylsilyl)oxy)methyl)phenyl)ethan-1-one** White solid (118.1 mg, 59% yield). mp 90.1–90.9 °C. The product was purified by silica gel column chromatography, using petroleum ether /EA = 20/1 (v/v) as an eluent.

<sup>1</sup>H NMR (400 MHz, CDCl<sub>3</sub>) δ 8.04 – 8.01 (m, 2H), 7.49 (d, *J* = 8.1 Hz, 2H), 7.28 – 7.24 (m, 2H), 7.07 – 7.03 (m, 2H), 4.93 (s, 2H), 4.29 (s, 2H), 1.27 – 1.18 (m, 3H), 1.14 (d, *J* = 6.7 Hz, 18H).

<sup>13</sup>C NMR (101 MHz, CDCl<sub>3</sub>) δ 197.1, 161.9 (d, *J* = 245.2 Hz), 147.6, 135.1, 131.1 (d, *J* = 8.0 Hz), 130.3 (d, *J* = 3.3 Hz), 128.6, 125.7, 115.5 (d, *J* = 21.3 Hz), 64.6, 44.5, 18.0, 12.0.

<sup>19</sup>F NMR (377 MHz, CDCl<sub>3</sub>) δ -116.01.

HRMS (ESI) *m/z*: [M + Na]<sup>+</sup> Calcd for C<sub>24</sub>H<sub>33</sub>FNaO<sub>2</sub>Si<sup>+</sup> 423.2126; Found 423.2122.

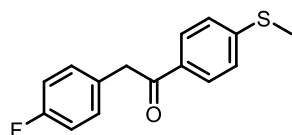

**2-(4-fluorophenyl)-1-(4-(methylthio)phenyl)ethan-1-one**<sup>[10]</sup> Light yellow solid (70.2 mg, 54% yield). The product was purified by silica gel column chromatography, using petroleum ether /EA = 10/1 (v/v) as an eluent.

<sup>1</sup>H NMR (400 MHz, CDCl<sub>3</sub>) δ 7.96 – 7.93 (m, 2H), 7.31 – 7.22 (m, 4H), 7.07 – 7.01 (m, 2H), 4.25 (s, 2H), 2.55 (s, 3H).

$^{13}\text{C}$  NMR (101 MHz,  $\text{CDCl}_3$ )  $\delta$  196.4, 161.9 (d,  $J = 245.2$  Hz), 146.3, 132.7, 131.0 (d,  $J = 7.9$  Hz), 130.3 (d,  $J = 3.4$  Hz), 129.0, 125.0, 115.5 (d,  $J = 21.3$  Hz) 44.4, 14.7.

$^{19}\text{F}$  NMR (377 MHz,  $\text{CDCl}_3$ )  $\delta$  -115.95.

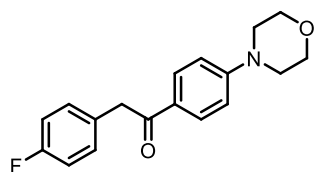

**2-(4-fluorophenyl)-1-(4-morpholinophenyl)ethan-1-one** Gray solid (101.7 mg, 68% yield). mp 127.7–128.6 °C. The product was purified by silica gel column chromatography, using petroleum ether /EA = 5/1 (v/v) as an eluent.

$^1\text{H}$  NMR (400 MHz,  $\text{CDCl}_3$ )  $\delta$  7.99 – 7.95 (m, 2H), 7.28 – 7.22 (m, 2H), 7.06 – 7.00 (m, 2H), 6.91 – 6.88 (m, 2H), 4.21 (s, 2H), 3.90 – 3.87 (m, 4H), 3.35 – 3.33 (m, 4H).

$^{13}\text{C}$  NMR (101 MHz,  $\text{CDCl}_3$ )  $\delta$  195.7, 161.8 (d,  $J = 244.7$  Hz), 154.3, 130.9 (d,  $J = 3.4$  Hz), 130.9, 130.7, 127.1, 115.4 (d,  $J = 21.3$  Hz), 113.3, 66.6, 47.4, 44.1.

$^{19}\text{F}$  NMR (377 MHz,  $\text{CDCl}_3$ )  $\delta$  -116.32.

HRMS (ESI)  $m/z$ :  $[\text{M} + \text{Na}]^+$  Calcd for  $\text{C}_{18}\text{H}_{18}\text{FNNaO}_2^+$  322.1214; Found 322.1213.

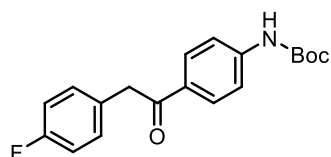

**tert-butyl (4-(2-(4-fluorophenyl)acetyl)phenyl)carbamate** White solid (88.9 mg, 54% yield). mp 169.8–170.4 °C. The product was purified by silica gel column chromatography, using petroleum ether /EA = 3/1 (v/v) as an eluent.

$^1\text{H}$  NMR (400 MHz,  $\text{DMSO}-d_6$ )  $\delta$  9.82 (s, 1H), 8.00 – 7.96 (m, 2H), 7.64 – 7.61 (m, 2H), 7.32 – 7.29 (m, 2H), 7.16 – 7.11 (m, 2H), 4.33 (s, 2H), 1.51 (s, 9H).

$^{13}\text{C}$  NMR (101 MHz,  $\text{DMSO}-d_6$ )  $\delta$  196.5, 161.5 (d,  $J = 242.1$  Hz), 153.0, 144.8, 132.0, 132.0 (d,  $J = 8.3$  Hz), 130.3 (d,  $J = 28.5$  Hz), 117.7, 115.4 (d,  $J = 21.1$  Hz), 80.2, 43.8, 28.5.

$^{19}\text{F}$  NMR (377 MHz,  $\text{CDCl}_3$ )  $\delta$  -116.11.

HRMS (ESI)  $m/z$ :  $[\text{M} + \text{Na}]^+$  Calcd for  $\text{C}_{19}\text{H}_{20}\text{FNNaO}_3^+$  352.1319; Found 352.1322.

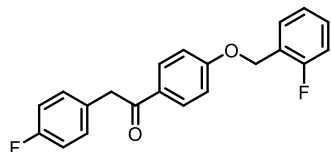

**1-(4-((2-fluorobenzyl)oxy)phenyl)-2-(4-fluorophenyl)ethan-1-one** White solid (126.7 mg, 75% yield). mp 132.7–132.3 °C. The product was purified by silica gel column chromatography, using petroleum ether /EA = 20/1 (v/v) as an eluent.

$^1\text{H}$  NMR (400 MHz,  $\text{CDCl}_3$ )  $\delta$  8.05 – 8.01 (m, 2H), 7.54 – 7.50 (m, 1H), 7.40 – 7.35 (m, 1H), 7.27 – 7.12 (m, 4H), 7.08 – 7.02 (m, 4H), 5.23 (s, 2H), 4.24 (s, 2H).

$^{13}\text{C}$  NMR (101 MHz,  $\text{CDCl}_3$ )  $\delta$  196.0, 162.5, 161.9 (d,  $J = 245.0$  Hz), 160.5 (d,  $J = 247.3$  Hz) 131.0 (d,  $J = 8.0$  Hz), 130.9, 130.5 (d,  $J = 3.3$  Hz), 130.1 (d,  $J = 8.1$  Hz), 129.9, 129.7 (d,  $J = 3.8$  Hz), 124.4 (d,  $J = 3.6$  Hz), 123.3 (d,  $J = 14.2$  Hz), 115.5 (d,  $J = 21.0$  Hz), 115.5 (d,  $J = 21.4$  Hz), 114.6, 63.9 (d,  $J = 4.6$  Hz), 44.3.

$^{19}\text{F}$  NMR (377 MHz,  $\text{CDCl}_3$ )  $\delta$  -116.11, -118.45.

HRMS (ESI)  $m/z$ :  $[\text{M} + \text{Na}]^+$  Calcd for  $\text{C}_{21}\text{H}_{16}\text{F}_2\text{NaO}_2^+$  361.1011; Found 361.1008.

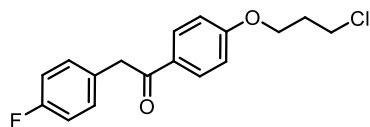

**1-(4-(3-chloropropoxy)phenyl)-2-(4-fluorophenyl)ethan-1-one** White solid (93.3 mg, 61% yield). mp 73.3–75.7 °C. The product was purified by silica gel column chromatography, using petroleum ether /EA = 20/1 (v/v) as an eluent.

$^1\text{H}$  NMR (400 MHz,  $\text{CDCl}_3$ )  $\delta$  8.03 – 8.01 (m, 2H), 7.27 – 7.24 (m, 2H), 7.07 – 6.96 (m, 4H), 4.24 – 4.19 (m, 4H), 3.78 (t,  $J$  = 6.2 Hz, 2H), 2.29 (p,  $J$  = 6.1 Hz, 2H).

$^{13}\text{C}$  NMR (101 MHz,  $\text{CDCl}_3$ )  $\delta$  196.0, 161.8 (d,  $J$  = 244.9 Hz), 160.6, 131.0 (d,  $J$  = 7.9 Hz), 130.91, 130.6 (d,  $J$  = 3.3 Hz), 129.7, 115.5 (d,  $J$  = 21.3 Hz), 114.3, 64.5, 44.2, 41.3, 32.0.

$^{19}\text{F}$  NMR (377 MHz,  $\text{CDCl}_3$ )  $\delta$  -116.09.

HRMS (ESI)  $m/z$ :  $[\text{M} + \text{Na}]^+$  Calcd for  $\text{C}_{17}\text{H}_{16}\text{ClFNaO}_2^+$  329.0715; Found 329.0706.

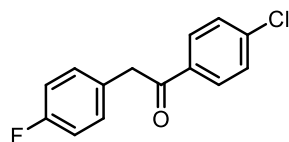

**1-(4-chlorophenyl)-2-(4-fluorophenyl)ethan-1-one**<sup>[11]</sup> White solid (44.7 mg, 36% yield). The product was purified by silica gel column chromatography, using petroleum ether /EA = 20/1 (v/v) as an eluent.

$^1\text{H}$  NMR (400 MHz,  $\text{CDCl}_3$ )  $\delta$  7.99 – 7.95 (m, 2H), 7.48 – 7.46 (m, 2H), 7.26 – 7.22 (m, 2H), 7.08 – 7.03 (m, 2H), 4.27 (s, 2H).

$^{13}\text{C}$  NMR (101 MHz,  $\text{CDCl}_3$ )  $\delta$  196.22, 162.0 (d,  $J$  = 245.5 Hz), 139.8, 134.7, 131.0 (d,  $J$  = 8.0 Hz), 130.0, 129.8 (d,  $J$  = 3.5 Hz), 129.2, 115.6 (d,  $J$  = 21.5 Hz), 44.5.

$^{19}\text{F}$  NMR (377 MHz,  $\text{CDCl}_3$ )  $\delta$  -115.65.

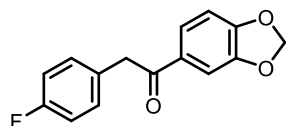

**1-(benzo[d][1,3]dioxol-5-yl)-2-(4-fluorophenyl)ethan-1-one** White solid (91.6 mg, 71% yield). mp 92.6–94.9 °C. The product was purified by silica gel column chromatography, using petroleum ether /EA = 15/1 (v/v) as an eluent.

$^1\text{H}$  NMR (400 MHz,  $\text{CDCl}_3$ )  $\delta$  7.65 (dd,  $J$  = 8.2, 1.8 Hz, 1H), 7.49 (d,  $J$  = 1.7 Hz, 1H), 7.27 – 7.22 (m, 2H), 7.07 – 7.01 (m, 2H), 6.89 (d,  $J$  = 8.2 Hz, 1H), 6.08 (s, 2H), 4.21 (s, 2H).

$^{13}\text{C}$  NMR (101 MHz,  $\text{CDCl}_3$ )  $\delta$  195.5, 161.9 (d,  $J$  = 245.1 Hz), 152.0, 148.3, 131.3, 130.9 (d,  $J$  = 8.0 Hz), 130.4 (d,  $J$  = 3.3 Hz), 124.9, 115.5 (d,  $J$  = 21.5 Hz), 108.3, 108.0, 101.9, 44.3.

$^{19}\text{F}$  NMR (377 MHz,  $\text{CDCl}_3$ )  $\delta$  -116.04.

HRMS (ESI)  $m/z$ :  $[\text{M} + \text{Na}]^+$  Calcd for  $\text{C}_{15}\text{H}_{11}\text{FNaO}_3^+$  281.0584; Found 281.0594.

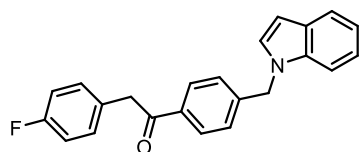

**1-(4-((1H-indol-1-yl)methyl)phenyl)-2-(4-fluorophenyl)ethan-1-one** Yellow solid (101.2 mg, 59% yield). mp 80.5–81.2 °C. (The product was purified by silica gel column chromatography, using petroleum ether /EA = 8/1 (v/v) as an eluent.)

<sup>1</sup>H NMR (400 MHz, CDCl<sub>3</sub>) δ 7.95 – 7.95 (m, 2H), 7.75 (dd, *J* = 7.0, 1.5 Hz, 1H), 7.30 – 7.18 (m, 8H), 7.09 – 7.03 (m, 2H), 6.66 (d, *J* = 3.1 Hz, 1H), 5.40 (s, 2H), 4.23 (s, 2H).

<sup>13</sup>C NMR (101 MHz, CDCl<sub>3</sub>) δ 196.9, 161.9 (d, *J* = 245.1 Hz), 143.3, 136.2, 135.8, 131.1 (d, *J* = 8.0 Hz), 130.1 (d, *J* = 3.3 Hz), 129.1, 128.9, 128.3, 126.9, 122.0, 121.2, 119.9, 115.6 (d, *J* = 21.4 Hz), 109.6, 102.3, 49.8, 44.6.

<sup>19</sup>F NMR (377 MHz, CDCl<sub>3</sub>) δ -115.79.

HRMS (ESI) *m/z*: [M + H]<sup>+</sup> Calcd for C<sub>23</sub>H<sub>19</sub>FNO<sup>+</sup> 344.1445; Found 344.1446.

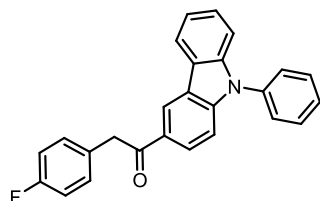

**2-(4-fluorophenyl)-1-(9-phenyl-9H-carbazol-3-yl)ethan-1-one** White solid (136.5 mg, 72% yield). mp 102.4–103.6 °C. The product was purified by silica gel column chromatography, using petroleum ether /EA = 6/1 (v/v) as an eluent.

<sup>1</sup>H NMR (400 MHz, CDCl<sub>3</sub>) δ 8.90 (d, *J* = 1.7 Hz, 1H), 8.24 (dt, *J* = 7.8, 1.0 Hz, 1H), 8.14 (dd, *J* = 8.7, 1.8 Hz, 1H), 7.69 – 7.65 (m, 2H), 7.59 – 7.49 (m, 4H), 7.46 – 7.32 (m, 5H), 7.09 – 7.05 (m, 2H), 4.44 (s, 2H).

<sup>13</sup>C NMR (101 MHz, CDCl<sub>3</sub>) δ 196.9, 161.9 (d, *J* = 245.0 Hz), 143.7, 141.8, 136.9, 131.1 (d, *J* = 8.0 Hz), 131.0 (d, *J* = 3.3 Hz), 130.1, 128.9, 128.2, 127.1, 127.0, 126.9, 123.4, 123.3, 122.0, 121.0, 120.6, 115.5 (d, *J* = 21.3 Hz), 110.4, 109.6, 44.6.

<sup>19</sup>F NMR (377 MHz, CDCl<sub>3</sub>) δ -116.15.

HRMS (ESI) *m/z*: [M + Na]<sup>+</sup> Calcd for C<sub>26</sub>H<sub>18</sub>FNNaO<sup>+</sup> 402.1265; Found 402.1264.

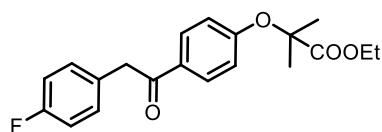

**ethyl 2-(4-(2-(4-fluorophenyl)acetyl)phenoxy)-2-methylpropanoate** White solid (130.7 mg, 76% yield). mp 101.7–102.5 °C. The product was purified by silica gel column chromatography, using petroleum ether /EA = 8/1 (v/v) as an eluent.

<sup>1</sup>H NMR (400 MHz, CDCl<sub>3</sub>) δ 7.98 – 7.94 (m, 2H), 7.26 – 7.21 (m, 2H), 7.06 – 7.01 (m, 2H), 6.88 – 6.84 (m, 2H), 4.28 – 4.22 (m, 4H), 1.68 (s, 6H), 1.24 (t, *J* = 7.1 Hz, 3H).

<sup>13</sup>C NMR (101 MHz, CDCl<sub>3</sub>) δ 196.0, 173.7, 161.9 (d, *J* = 245.0 Hz), 160.0, 131.0 (d, *J* = 8.0 Hz), 130.5, 130.4, 130.0, 117.4, 115.5 (d, *J* = 21.3 Hz), 79.4, 6.73, 44.2, 25.4, 14.0.

<sup>19</sup>F NMR (377 MHz, CDCl<sub>3</sub>) δ -116.13.

HRMS (ESI) *m/z*: [M + Na]<sup>+</sup> Calcd for C<sub>20</sub>H<sub>21</sub>FNaO<sub>4</sub><sup>+</sup> 367.1316; Found 367.1316.

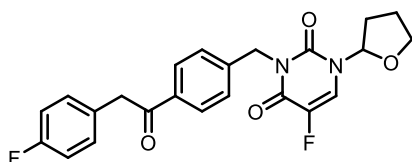

**5-fluoro-3-(4-(2-(4-fluorophenyl)acetyl)benzyl)-1-(tetrahydrofuran-2-yl)pyrimidine-2,4(1H,3H)-dione 1-(3,5-dimethylphenyl)-2-(4-fluorophenyl)ethan-1-one** Yellow oil (140.6 mg, 66% yield). The product was purified by silica gel column chromatography, using petroleum ether /EA = 5/1 (v/v) as an eluent.

$^1\text{H}$  NMR (400 MHz,  $\text{CDCl}_3$ )  $\delta$  7.98 – 7.95 (m, 2H), 7.58 – 7.56 (m, 2H), 7.44 (d,  $J$  = 5.8 Hz, 1H), 7.25 – 7.20 (m, 2H), 7.06 – 7.00 (m, 2H), 6.00 (ddd,  $J$  = 6.3, 3.0, 1.4 Hz, 1H), 5.23 – 5.12 (m, 2H), 4.27 – 4.22 (m, 3H), 4.01 (td,  $J$  = 8.4, 6.4 Hz, 1H), 2.48 – 2.38 (m, 1H), 2.12 – 2.03 (m, 2H), 1.98 – 1.89 (m, 1H).

$^{13}\text{C}$  NMR (101 MHz,  $\text{CDCl}_3$ )  $\delta$  197.0, 161.9 (d,  $J$  = 245.3 Hz), 157.1 (d,  $J$  = 25.6 Hz), 149.0, 141.5, 139.9 (d,  $J$  = 234.7 Hz), 135.9, 131.0 (d,  $J$  = 7.9 Hz), 130.1 (d,  $J$  = 3.3 Hz), 129.3, 128.8, 122.1 (d,  $J$  = 34.0 Hz), 115.5 (d,  $J$  = 21.3 Hz), 88.2, 70.4, 44.6, 44.4, 33.0, 23.8.

$^{19}\text{F}$  NMR (377 MHz,  $\text{CDCl}_3$ )  $\delta$  -116.0, -164.1.

HRMS (ESI)  $m/z$ :  $[\text{M} + \text{Na}]^+$  Calcd for  $\text{C}_{23}\text{H}_{20}\text{F}_2\text{N}_2\text{NaO}_4^+$  449.1283; Found 449.1284.

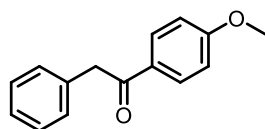

**1-(4-methoxyphenyl)-2-phenylethan-1-one**<sup>[12]</sup> White solid (96.0 mg, 85% yield). The product was purified by silica gel column chromatography, using petroleum ether /EA = 20/1 (v/v) as an eluent.  $^1\text{H}$  NMR (400 MHz,  $\text{CDCl}_3$ )  $\delta$  8.06 – 8.01 (m, 2H), 7.38 – 7.26 (m, 5H), 6.98 – 6.95 (m, 2H), 4.27 (s, 2H), 3.89 (s, 3H).

$^{13}\text{C}$  NMR (101 MHz,  $\text{CDCl}_3$ )  $\delta$  196.3, 163.5, 135.0, 131.0, 129.7, 129.4, 128.7, 126.8, 113.8, 55.5, 45.3.

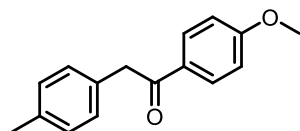

**1-(4-methoxyphenyl)-2-(p-tolyl)ethan-1-one**<sup>[13]</sup> Light yellow oil (97.2 mg, 81% yield). The product was purified by silica gel column chromatography, using petroleum ether /EA = 20/1 (v/v) as an eluent.

$^1\text{H}$  NMR (400 MHz,  $\text{CDCl}_3$ )  $\delta$  8.04 – 8.01 (m, 2H), 7.20 – 7.14 (m, 4H), 6.97 – 6.93 (m, 2H), 4.22 (s, 2H), 3.89 (s, 3H), 2.35 (s, 3H).

$^{13}\text{C}$  NMR (101 MHz,  $\text{CDCl}_3$ )  $\delta$  196.5, 163.5, 136.4, 131.9, 131.0, 129.7, 129.4, 129.2, 113.8, 55.5, 44.9, 21.1.

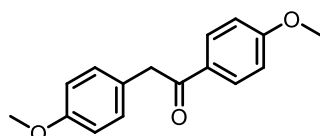

**1,2-bis(4-methoxyphenyl)ethan-1-one**<sup>[9]</sup> White solid (92.2 mg, 72% yield). The product was purified by silica gel column chromatography, using petroleum ether /EA = 15/1 (v/v) as an eluent.

$^1\text{H}$  NMR (400 MHz,  $\text{CDCl}_3$ )  $\delta$  8.05 – 8.00 (m, 2H), 7.24 – 7.20 (m, 2H), 6.98 – 6.94 (m, 2H), 6.91 – 6.87 (m, 2H), 4.21 (s, 2H), 3.89 (s, 3H), 3.81 (s, 3H).

$^{13}\text{C}$  NMR (101 MHz,  $\text{CDCl}_3$ )  $\delta$  196.6, 163.5, 158.5, 131.0, 130.4, 129.6, 127.0, 114.1, 113.8, 55.5, 55.3, 44.4.

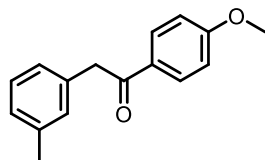

**1-(4-methoxyphenyl)-2-(m-tolyl)ethan-1-one**<sup>[14]</sup> White solid (94.8 mg, 79% yield). (The product was purified by silica gel column chromatography, using petroleum ether /EA = 20/1 (v/v) as an eluent.)

$^1\text{H}$  NMR (400 MHz,  $\text{CDCl}_3$ )  $\delta$  8.06 – 8.03 (m, 2H), 7.25 (t,  $J$  = 7.5 Hz, 1H), 7.11 (dd,  $J$  = 12.1, 5.5 Hz, 3H), 6.98 – 6.95 (m, 2H), 4.23 (s, 2H), 3.89 (s, 3H), 2.36 (s, 3H).

$^{13}\text{C}$  NMR (101 MHz,  $\text{CDCl}_3$ )  $\delta$  196.4, 163.5, 138.3, 134.9, 131.0, 130.1, 129.7, 128.6, 127.6, 126.4, 113.8, 55.5, 45.3, 21.4.

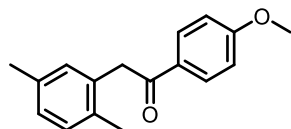

**2-(2,5-dimethylphenyl)-1-(4-methoxyphenyl)ethan-1-one** Yellow oil (83.8 mg, 66% yield). The product was purified by silica gel column chromatography, using petroleum ether /EA = 20/1 (v/v) as an eluent.

$^1\text{H}$  NMR (400 MHz,  $\text{CDCl}_3$ )  $\delta$  8.07 – 8.04 (m, 2H), 7.14 (d,  $J$  = 7.7 Hz, 1H), 7.05 – 6.98 (m, 4H), 4.26 (s, 2H), 3.91 (s, 3H), 2.33 (s, 3H), 2.27 (s, 3H).

$^{13}\text{C}$  NMR (101 MHz,  $\text{CDCl}_3$ )  $\delta$  196.3, 163.5, 135.5, 133.7, 133.6, 131.0, 130.7, 130.2, 130.0, 127.9, 113.8, 55.5, 43.1, 21.0, 19.4.

HRMS (ESI)  $m/z$ :  $[\text{M} + \text{Na}]^+$  Calcd for  $\text{C}_{17}\text{H}_{18}\text{NaO}_2^+$  277.1199; Found 277.1199.

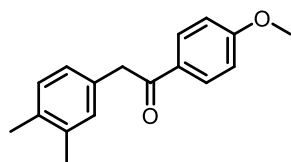

**2-(3,4-dimethylphenyl)-1-(4-methoxyphenyl)ethan-1-one** White solid (106.7 mg, 84% yield). mp 49.0–50.4 °C. The product was purified by silica gel column chromatography, using petroleum ether /EA = 20/1 (v/v) as an eluent.

$^1\text{H}$  NMR (400 MHz,  $\text{CDCl}_3$ )  $\delta$  8.07 – 8.02 (m, 2H), 7.13 – 7.09 (m, 2H), 7.04 (dd,  $J$  = 7.7, 2.0 Hz, 1H), 6.98 – 6.94 (m, 2H), 4.21 (s, 2H), 3.89 (s, 3H), 2.27 (d,  $J$  = 4.0 Hz, 6H).

$^{13}\text{C}$  NMR (101 MHz,  $\text{CDCl}_3$ )  $\delta$  196.63, 163.5, 136.9, 135.1, 132.3, 131.0, 130.6, 129.9, 129.7, 126.7, 113.8, 55.5, 44.9, 19.8, 19.4.

HRMS (ESI)  $m/z$ :  $[\text{M} + \text{Na}]^+$  Calcd for  $\text{C}_{17}\text{H}_{18}\text{NaO}_2^+$  277.1199; Found 277.1198.

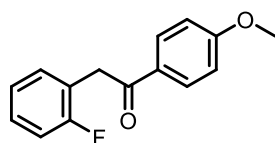

**2-(2-fluorophenyl)-1-(4-methoxyphenyl)ethan-1-one** White solid (69.5 mg, 57% yield). mp 75.3–76.9 °C. The product was purified by silica gel column chromatography, using petroleum ether /EA = 20/1 (v/v) as an eluent.

<sup>1</sup>H NMR (400 MHz, CDCl<sub>3</sub>) δ 8.08 – 8.04 (m, 2H), 7.32 – 7.26 (m, 2H), 7.16 – 7.08 (m, 2H), 7.00 – 6.97 (m, 2H), 4.31 (s, 2H), 3.90 (s, 3H).

<sup>13</sup>C NMR (101 MHz, CDCl<sub>3</sub>) δ 195.0, 160.9 (d, *J* = 245.4 Hz), 159.7, 131.6 (d, *J* = 4.2 Hz), 129.5, 128.8 (d, *J* = 8.1 Hz), 124.2 (d, *J* = 3.5 Hz), 122.3, 122.1, 115.4 (d, *J* = 22.0 Hz), 113.9, 55.5, 38.3 (d, *J* = 2.2 Hz).

<sup>19</sup>F NMR (377 MHz, CDCl<sub>3</sub>) δ -117.20.

HRMS (ESI) *m/z*: [M + Na]<sup>+</sup> Calcd for C<sub>15</sub>H<sub>13</sub>FN<sub>2</sub>O<sub>2</sub><sup>+</sup> 267.0792; Found 267.0796.

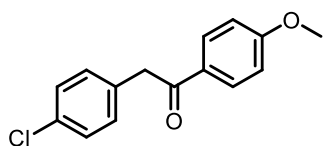

**2-(4-chlorophenyl)-1-(4-methoxyphenyl)ethan-1-one**<sup>[15]</sup> Light yellow solid (84.5 mg, 65% yield). The product was purified by silica gel column chromatography, using petroleum ether /EA = 20/1 (v/v) as an eluent.

<sup>1</sup>H NMR (400 MHz, CDCl<sub>3</sub>) δ 8.02 – 8.00 (m, 2H), 7.33 – 7.30 (m, 2H), 7.24 – 7.22 (m, 2H), 6.98 – 6.96 (m, 2H), 4.24 (s, 2H), 3.90 (s, 3H).

<sup>13</sup>C NMR (101 MHz, CDCl<sub>3</sub>) δ 195.7, 163.7, 133.4, 132.8, 130.9, 130.8, 129.4, 128.8, 113.9, 55.5, 44.4.

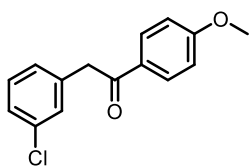

**2-(3-chlorophenyl)-1-(4-methoxyphenyl)ethan-1-one**<sup>[16]</sup> White solid (87.1 mg, 67% yield). The product was purified by silica gel column chromatography, using petroleum ether /EA = 20/1 (v/v) as an eluent.

<sup>1</sup>H NMR (400 MHz, CDCl<sub>3</sub>) δ 8.03 – 7.99 (m, 2H), 7.30 – 7.21 (m, 3H), 7.18 (dt, *J* = 6.8, 1.9 Hz, 1H), 6.99 – 6.95 (m, 2H), 4.23 (s, 2H), 3.89 (s, 3H).

<sup>13</sup>C NMR (101 MHz, CDCl<sub>3</sub>) δ 195.5, 163.7, 136.9, 134.4, 130.9, 129.8, 129.6, 129.4, 127.7, 127.1, 113.9, 55.5, 44.7.

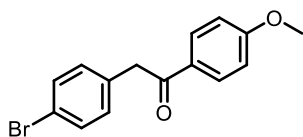

**2-(4-bromophenyl)-1-(4-methoxyphenyl)ethan-1-one**<sup>[17]</sup> White solid (77.5 mg, 51% yield). The product was purified by silica gel column chromatography, using petroleum ether /EA = 20/1 (v/v) as an eluent.

<sup>1</sup>H NMR (400 MHz, CDCl<sub>3</sub>) δ 8.03 – 7.99 (m, 2H), 7.49 – 7.46 (m, 2H), 7.19 – 7.15 (m, 2H), 6.99 – 6.95 (m, 2H), 4.22 (s, 2H), 3.90 (s, 3H).

<sup>13</sup>C NMR (101 MHz, CDCl<sub>3</sub>) δ 195.6, 163.7, 133.9, 131.7, 131.2, 130.9, 129.4, 120.9, 113.9, 55.5, 44.5.

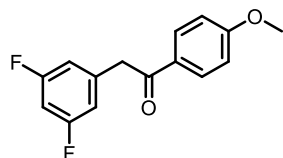

**2-(3,5-difluorophenyl)-1-(4-methoxyphenyl)ethan-1-one** Light yellow solid (81.2 mg, 62% yield). mp 77.2–79.6 °C. The product was purified by silica gel column chromatography, using petroleum ether /EA = 20/1 (v/v) as an eluent.

<sup>1</sup>H NMR (400 MHz, CDCl<sub>3</sub>) δ 8.02 – 7.98 (m, 2H), 7.00 – 6.96 (m, 2H), 6.85 – 6.80 (m, 2H), 6.73 (tt, *J* = 9.0, 2.4 Hz, 1H), 4.24 (s, 2H), 3.91 (s, 3H).

<sup>13</sup>C NMR (101 MHz, CDCl<sub>3</sub>) δ 194.8, 163.9, 163.0 (dd, *J* = 248.3, 13.0 Hz), 138.5 (t, *J* = 9.6 Hz), 130.9, 129.2, 114.0, 112.7 – 112.4 (m), 102.4 (t, *J* = 25.2 Hz), 55.5, 44.6 (t, *J* = 2.1 Hz).

<sup>13</sup>C NMR (101 MHz, CDCl<sub>3</sub>) δ 196.3, 163.5, 135.0, 131.0, 129.7, 129.4, 128.7, 126.8, 113.8, 55.5, 45.3.

<sup>19</sup>F NMR (377 MHz, CDCl<sub>3</sub>) δ -110.00.

HRMS (ESI) *m/z*: [M + Na]<sup>+</sup> Calcd for C<sub>15</sub>H<sub>12</sub>F<sub>2</sub>NaO<sub>2</sub><sup>+</sup> 285.0698; Found 285.0697.

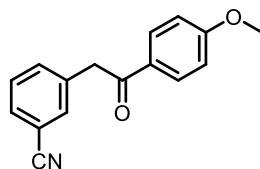

**3-(2-(4-methoxyphenyl)-2-oxoethyl)benzonitrile** Light yellow solid (77.8 mg, 62% yield). mp 81.4–82.7 °C. The product was purified by silica gel column chromatography, using petroleum ether /EA = 20/1 (v/v) as an eluent.

<sup>1</sup>H NMR (400 MHz, CDCl<sub>3</sub>) δ 8.04 – 8.00 (m, 2H), 7.60 – 7.45 (m, 4H), 7.01 – 7.68 (m, 2H), 4.31 (s, 2H), 3.91 (s, 3H).

<sup>13</sup>C NMR (101 MHz, CDCl<sub>3</sub>) δ 194.8, 163.9, 136.3, 134.3, 133.2, 130.8, 130.6, 129.3, 129.2, 118.8, 114.0, 112.6, 55.6, 44.3.

HRMS (ESI) *m/z*: [M + Na]<sup>+</sup> Calcd for C<sub>16</sub>H<sub>13</sub>NNaO<sub>2</sub><sup>+</sup> 274.0838; Found 274.0836.

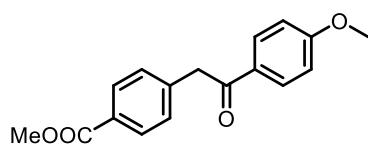

**methyl 4-(2-(4-methoxyphenyl)-2-oxoethyl)benzoate** White solid (63.9 mg, 45% yield). mp 155.5–156.1 °C. (The product was purified by silica gel column chromatography, using petroleum ether /EA = 10/1 (v/v) as an eluent.)

<sup>1</sup>H NMR (400 MHz, CDCl<sub>3</sub>) δ 8.04 – 7.99 (m, 4H), 7.38 – 7.36 (m, 2H), 6.99 – 6.95 (m, 2H), 4.32 (s, 2H), 3.93 (s, 3H), 3.89 (s, 3H).

<sup>13</sup>C NMR (101 MHz, CDCl<sub>3</sub>) δ 195.4, 167.0, 163.7, 140.3, 130.9, 129.9, 129.6, 129.4, 128.8, 113.9, 55.5, 52.1, 45.2.

HRMS (ESI) *m/z*: [M + Na]<sup>+</sup> Calcd for C<sub>16</sub>H<sub>13</sub>NNaO<sub>2</sub><sup>+</sup> 307.0941; Found 307.0955.



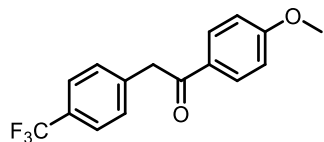

**1-(4-methoxyphenyl)-2-(4-(trifluoromethyl)phenyl)ethan-1-one**<sup>[18]</sup> Light yellow solid (122.1 mg, 83% yield). The product was purified by silica gel column chromatography, using petroleum ether /EA = 30/1 (v/v) as an eluent.

<sup>1</sup>H NMR (400 MHz, CDCl<sub>3</sub>) δ 8.04 – 8.02 (m, 2H), 7.62 (d, *J* = 8.1 Hz, 2H), 7.41 (d, *J* = 8.0 Hz, 2H), 7.00 – 6.98 (m, 2H), 4.33 (s, 2H), 3.91 (s, 3H).

<sup>13</sup>C NMR (101 MHz, CDCl<sub>3</sub>) δ 195.3, 163.8, 139.0 (d, *J* = 1.5 Hz), 130.9, 129.9, 129.2 (d, *J* = 32.6 Hz), 128.98, 125.5 (q, *J* = 3.8 Hz), 122.9, 114.0, 55.5, 44.8.

<sup>19</sup>F NMR (377 MHz, CDCl<sub>3</sub>) δ -62.41.

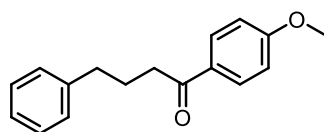

**1-(4-methoxyphenyl)-4-phenylbutan-1-one**<sup>[19]</sup> White solid (90.2 mg, 71% yield). The product was purified by silica gel column chromatography, using petroleum ether /EA = 20/1 (v/v) as an eluent.

<sup>1</sup>H NMR (400 MHz, CDCl<sub>3</sub>) δ 7.97 – 7.93 (m, 2H), 7.33 (dd, *J* = 8.1, 6.7 Hz, 2H), 7.26 – 7.22 (m, 3H), 6.98 – 6.94 (m, 2H), 3.90 (s, 3H), 2.97 (t, *J* = 7.3 Hz, 2H), 2.76 (t, *J* = 7.6 Hz, 2H), 2.12 (p, *J* = 7.5 Hz, 2H).

<sup>13</sup>C NMR (101 MHz, CDCl<sub>3</sub>) δ 198.8, 163.4, 141.8, 130.3, 130.1, 128.6, 128.4, 126.0, 113.7, 55.5, 37.4, 35.3, 26.0.

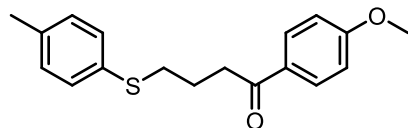

**1-(4-methoxyphenyl)-4-(p-tolylthio)butan-1-one** Yellow oil (84.0 mg, 56% yield). The product was purified by silica gel column chromatography, using petroleum ether /EA = 15/1 (v/v) as an eluent.

<sup>1</sup>H NMR (400 MHz, CDCl<sub>3</sub>) δ 7.97 – 7.93 (m, 2H), 7.32 – 7.29 (m, 2H), 7.14 – 7.11 (m, 2H), 6.97 – 6.93 (m, 2H), 3.89 (s, 3H), 3.10 (t, *J* = 7.1 Hz, 2H), 3.02 (t, *J* = 7.0 Hz, 2H), 2.34 (s, 3H), 2.08 (p, *J* = 7.0 Hz, 2H).

<sup>13</sup>C NMR (101 MHz, CDCl<sub>3</sub>) δ 198.1, 163.5, 136.2, 132.3, 130.3, 130.1, 130.0, 129.7, 113.7, 55.5, 36.6, 33.9, 23.7, 21.0.

HRMS (ESI) *m/z*: [M + Na]<sup>+</sup> Calcd for C<sub>18</sub>H<sub>20</sub>NaO<sub>2</sub>S<sup>+</sup> 323.1076; Found 323.1080.

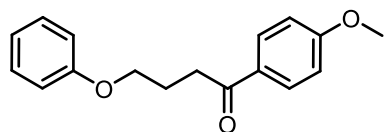

**1-(4-methoxyphenyl)-4-phenoxybutan-1-one** White solid (72.9 mg, 54% yield). mp 60.1–61.2 °C. The product was purified by silica gel column chromatography, using petroleum ether /EA = 20/1 (v/v) as an eluent.

<sup>1</sup>H NMR (400 MHz, CDCl<sub>3</sub>) δ 8.03 – 7.99 (m, 2H), 7.34 – 7.29 (m, 2H), 7.00 – 6.90 (m, 5H), 4.10 (t, *J* = 6.0 Hz, 2H), 3.90 (s, 3H), 3.19 (t, *J* = 7.1 Hz, 2H), 2.30 – 2.24 (m, 2H).

<sup>13</sup>C NMR (101 MHz, CDCl<sub>3</sub>) δ 198.3, 163.5, 158.9, 130.3, 130.1, 129.5, 120.7, 114.5, 113.7, 66.9, 55.5, 34.6, 24.0.

HRMS (ESI) *m/z*: [M + Na]<sup>+</sup> Calcd for C<sub>17</sub>H<sub>18</sub>NaO<sub>3</sub><sup>+</sup> 293.1148; Found 293.1152.

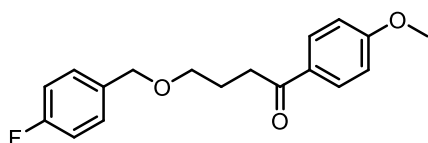

**4-((4-fluorobenzyl)oxy)-1-(4-methoxyphenyl)butan-1-one** White solid (77.1 mg, 51% yield). mp 54.5–55.1 °C. The product was purified by silica gel column chromatography, using petroleum ether /EA = 20/1 (v/v) as an eluent.

<sup>1</sup>H NMR (400 MHz, CDCl<sub>3</sub>) δ 8.05 – 7.88 (m, 2H), 7.36 – 7.24 (m, 2H), 7.08 – 7.00 (m, 2H), 6.98 – 6.91 (m, 2H), 4.48 (s, 2H), 3.89 (s, 3H), 3.59 (t, *J* = 6.1 Hz, 2H), 3.07 (t, *J* = 7.2 Hz, 2H), 2.14 – 2.02 (m, 2H).

<sup>13</sup>C NMR (101 MHz, CDCl<sub>3</sub>) δ 198.5, 162.3 (d, *J* = 245.4 Hz), 161.1, 134.2 (d, *J* = 3.3 Hz), 130.3, 130.1, 129.4 (d, *J* = 8.1 Hz), 115.2 (d, *J* = 21.3 Hz), 113.7, 72.2, 69.5, 55.5, 34.7, 24.5.

<sup>19</sup>F NMR (377 MHz, CDCl<sub>3</sub>) δ -114.97.

HRMS (ESI) *m/z*: [M + Na]<sup>+</sup> Calcd for C<sub>18</sub>H<sub>19</sub>FNaO<sub>3</sub><sup>+</sup> 325.1210; Found 325.1207.

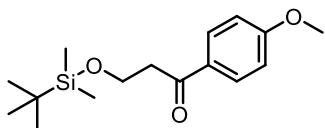

**3-((tert-butyldimethylsilyl)oxy)-1-(4-methoxyphenyl)propan-1-one** White solid (91.2 mg, 62% yield). mp 41.3–42.3 °C. The product was purified by silica gel column chromatography, using petroleum ether /EA = 20/1 (v/v) as an eluent.

<sup>1</sup>H NMR (400 MHz, CDCl<sub>3</sub>) δ 7.98 (d, *J* = 8.9 Hz, 2H), 6.95 (d, *J* = 9.0 Hz, 2H), 4.07 (t, *J* = 7.1 Hz, 2H), 3.89 (s, 3H), 3.18 – 3.15 (m, 2H), 0.89 (s, 9H), 0.07 (s, 6H).

<sup>13</sup>C NMR (101 MHz, CDCl<sub>3</sub>) δ 197.8, 163.5, 130.5, 130.5, 113.7, 59.5, 55.5, 41.4, 25.9, 18.3, -5.4.

HRMS (ESI) *m/z*: [M + Na]<sup>+</sup> Calcd for C<sub>16</sub>H<sub>26</sub>NaO<sub>3</sub>Si<sup>+</sup> 317.1543; Found 317.1553.

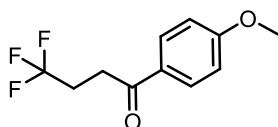

**4,4,4-trifluoro-1-(4-methoxyphenyl)butan-1-one**<sup>[20]</sup> Light yellow solid (40.6 mg, 35% yield). The product was purified by silica gel column chromatography, using petroleum ether /EA = 25/1 (v/v) as an eluent.

<sup>1</sup>H NMR (400 MHz, CDCl<sub>3</sub>) δ 8.01 – 7.97 (m, 2H), 7.00 – 6.95 (m, 2H), 3.91 (s, 3H), 3.26 – 3.22 (m, 2H), 2.67 – 2.54 (m, 2H).

<sup>13</sup>C NMR (101 MHz, CDCl<sub>3</sub>) δ 194.9, 163.9, 130.3, 129.2, 127.2 (q, *J* = 275.9 Hz), 113.9, 55.5, 30.8 (q, *J* = 2.6 Hz), 28.5 (q, *J* = 29.6 Hz).

$^{19}\text{F}$  NMR (377 MHz,  $\text{CDCl}_3$ )  $\delta$  -66.37.

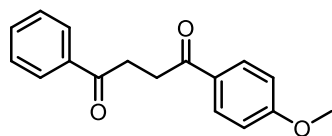

**1-(4-methoxyphenyl)-4-phenylbutane-1,4-dione**<sup>[21]</sup> White solid (88.5 mg, 66% yield). The product was purified by silica gel column chromatography, using petroleum ether /EA = 15/1 (v/v) as an eluent.

$^1\text{H}$  NMR (400 MHz,  $\text{CDCl}_3$ )  $\delta$  8.10 – 8.03 (m, 4H), 7.62 – 7.58 (m, 1H), 7.52 – 7.48 (m, 2H), 7.00 – 6.96 (m, 2H), 3.90 (s, 3H), 3.50 – 3.42 (m, 4H).

$^{13}\text{C}$  NMR (101 MHz,  $\text{CDCl}_3$ )  $\delta$  198.9, 197.2, 163.6, 136.8, 133.1, 130.4, 129.9, 128.6, 128.1, 113.8, 55.5, 32.7, 32.2.

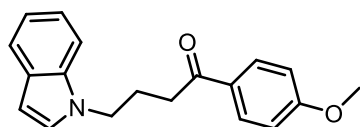

**4-(1H-indol-1-yl)-1-(4-methoxyphenyl)butan-1-one** Yellow solid (64.5 mg, 44% yield). mp 68.8–70.6 °C. The product was purified by silica gel column chromatography, using petroleum ether /EA = 15/1 (v/v) as an eluent.

$^1\text{H}$  NMR (400 MHz,  $\text{CDCl}_3$ )  $\delta$  7.89 (d,  $J$  = 8.7 Hz, 2H), 7.68 (dd,  $J$  = 7.9, 1.2 Hz, 1H), 7.43 (d,  $J$  = 8.2 Hz, 1H), 7.27 – 7.22 (m, 1H), 7.17 – 7.13 (m, 2H), 6.96 – 6.92 (m, 2H), 6.54 (d,  $J$  = 3.1 Hz, 1H), 4.30 (t,  $J$  = 6.8 Hz, 2H), 3.89 (s, 3H), 2.91 (t,  $J$  = 6.8 Hz, 2H), 2.33 (p,  $J$  = 6.8 Hz, 2H).

$^{13}\text{C}$  NMR (101 MHz,  $\text{CDCl}_3$ )  $\delta$  197.8, 163.6, 136.0, 130.3, 129.8, 128.7, 127.9, 121.6, 121.0, 119.4, 113.8, 109.5, 101.2, 55.5, 45.5, 34.6, 24.6.

HRMS (ESI)  $m/z$ :  $[\text{M} + \text{Na}]^+$  Calcd for  $\text{C}_{19}\text{H}_{19}\text{NNaO}_2^+$  316.1308; Found 316.1308.

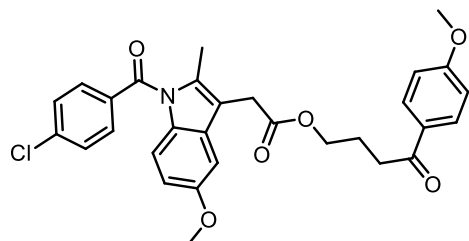

**4-(4-methoxyphenyl)-4-oxobutyl 2-(1-(4-chlorobenzoyl)-5-methoxy-2-methyl-1H-indol-3-yl)acetate** White solid (138.6 mg, 52% yield). mp 133.3–134.0 °C. The product was purified by silica gel column chromatography, using petroleum ether /EA = 3/1 (v/v) as an eluent.

$^1\text{H}$  NMR (400 MHz,  $\text{CDCl}_3$ )  $\delta$  7.83 – 7.79 (m, 2H), 7.65 – 7.62 (m, 2H), 7.47 – 7.44 (m, 2H), 7.01 (d,  $J$  = 2.5 Hz, 1H), 6.92 – 6.88 (m, 3H), 6.69 (dd,  $J$  = 9.0, 2.6 Hz, 1H), 4.23 (t,  $J$  = 6.3 Hz, 2H), 3.88 (s, 3H), 3.82 (s, 3H), 3.68 (s, 2H), 2.89 (t,  $J$  = 7.2 Hz, 2H), 2.40 (s, 3H), 2.12 – 2.05 (m, 2H).

$^{13}\text{C}$  NMR (101 MHz,  $\text{CDCl}_3$ )  $\delta$  197.5, 170.8, 168.3, 163.5, 156.1, 139.2, 135.9, 133.9, 131.2, 130.8, 130.6, 130.2, 129.8, 129.1, 115.0, 113.7, 112.7, 111.7, 101.3, 64.4, 55.7, 55.5, 34.2, 30.5, 23.3, 13.4.

HRMS (ESI)  $m/z$ :  $[\text{M} + \text{Na}]^+$  Calcd for  $\text{C}_{30}\text{H}_{28}\text{ClNNaO}_6^+$  566.1497; Found 566.1509.

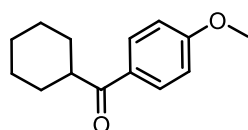

**cyclohexyl(4-methoxyphenyl)methanone**<sup>[22]</sup> White solid (62.2 mg, 57% yield). The product was purified by silica gel column chromatography, using petroleum ether /EA = 30/1 (v/v) as an eluent. <sup>1</sup>H NMR (400 MHz, CDCl<sub>3</sub>) δ 7.98 – 7.95 (m, 2H), 6.98 – 6.94 (m, 2H), 3.89 (s, 3H), 3.25 (tt, *J* = 11.5, 3.2 Hz, 1H), 1.92 – 1.73 (m, 5H), 1.57 – 1.22 (m, 5H).

<sup>13</sup>C NMR (101 MHz, CDCl<sub>3</sub>) δ 202.5, 163.2, 130.5, 129.3, 113.7, 55.5, 45.3, 29.6, 26.0, 25.9.

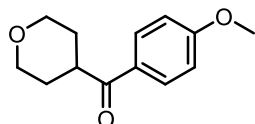

**(4-methoxyphenyl)(tetrahydro-2H-pyran-4-yl)methanone**<sup>[23]</sup> Light yellow solid (46.3 mg, 42% yield). The product was purified by silica gel column chromatography, using petroleum ether /EA = 5/1 (v/v) as an eluent.

<sup>1</sup>H NMR (400 MHz, CDCl<sub>3</sub>) δ 7.98 – 7.94 (m, 2H), 6.99 – 6.94 (m, 2H), 4.08 (ddd, *J* = 11.5, 4.3, 2.4 Hz, 2H), 3.90 (s, 3H), 3.58 (td, *J* = 11.6, 2.4 Hz, 2H), 3.49 (tt, *J* = 11.2, 3.9 Hz, 1H), 1.96 – 1.86 (m, 2H), 1.81 – 1.76 (m, 2H).

<sup>13</sup>C NMR (101 MHz, CDCl<sub>3</sub>) δ 200.4, 163.5, 130.6, 128.7, 113.9, 67.4, 55.5, 42.3, 29.2.

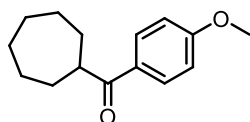

**cycloheptyl(4-methoxyphenyl)methanone**<sup>[24]</sup> Colorless oil (60.3 mg, 52% yield). The product was purified by silica gel column chromatography, using petroleum ether /EA = 30/1 (v/v) as an eluent.

<sup>1</sup>H NMR (400 MHz, CDCl<sub>3</sub>) δ 7.98 – 7.94 (m, 2H), 6.98 – 6.95 (m, 2H), 3.90 (s, 3H), 3.42 (tt, *J* = 9.6, 4.0 Hz, 1H), 1.97 – 1.91 (m, 2H), 1.86 – 1.55 (m, 10H).

<sup>13</sup>C NMR (101 MHz, CDCl<sub>3</sub>) δ 203.0, 163.2, 130.6, 129.3, 113.7, 55.5, 46.3, 31.0, 28.4, 26.9.

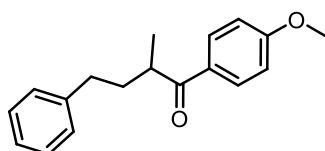

**1-(4-methoxyphenyl)-2-methyl-4-phenylbutan-1-one**<sup>[25]</sup> Colorless oil (72.4 mg, 54% yield). The product was purified by silica gel column chromatography, using petroleum ether /EA = 30/1 (v/v) as an eluent.

<sup>1</sup>H NMR (400 MHz, CDCl<sub>3</sub>) δ 7.92 – 7.88 (m, 2H), 7.33– 7.29 (m, 2H), 7.25 – 7.18 (m, 3H), 6.98 – 6.93 (m, 2H), 3.90 (s, 3H), 3.51 – 3.42 (m, 1H), 2.70 – 2.65 (m, 2H), 2.25– 2.16 (m, 1H), 1.83 – 1.75 (m, 1H), 1.26 (d, *J* = 6.9 Hz, 3H).

<sup>13</sup>C NMR (101 MHz, CDCl<sub>3</sub>) δ 202.7, 163.4, 141.9, 130.6, 129.5, 128.5, 128.4, 125.9, 113.8, 55.5, 39.3, 35.4, 33.5, 17.5.

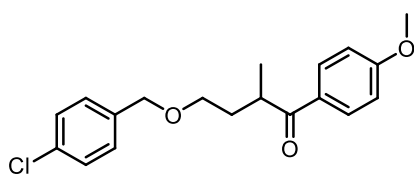

**4-((4-chlorobenzyl)oxy)-1-(4-methoxyphenyl)-2-methylbutan-1-one** Colorless oil (59.7 mg, 36% yield). The product was purified by silica gel column chromatography, using petroleum ether /EA = 20/1 (v/v) as an eluent.

$^1\text{H NMR}$  (400 MHz,  $\text{CDCl}_3$ )  $\delta$  8.01 – 7.97 (m, 2H), 7.29 – 7.19 (m, 4H), 6.97 – 6.93 (m, 2H), 4.41 (d,  $J = 3.7$  Hz, 2H), 3.90 (s, 3H), 3.74 – 3.69 (td,  $J = 7.4, 6.1$  Hz, 1H), 3.55 (ddd,  $J = 9.5, 6.7, 5.3$  Hz, 1H), 3.45 (ddd,  $J = 9.5, 7.1, 5.2$  Hz, 1H), 2.23 – 2.15 (m, 1H), 1.81 – 1.72 (m, 1H), 1.22 (d,  $J = 6.9$  Hz, 3H).

$^{13}\text{C NMR}$  (101 MHz,  $\text{CDCl}_3$ )  $\delta$  202.7, 163.4, 136.9, 133.2, 130.7, 129.6, 128.9, 128.5, 113.8, 72.1, 68.2, 55.5, 36.8, 33.7, 17.9.

HRMS (ESI)  $m/z$ :  $[\text{M} + \text{Na}]^+$  Calcd for  $\text{C}_{19}\text{H}_{21}\text{ClNaO}_3^+$  355.1071; Found 355.1081.

# NMR Spectra of Substrates and Products

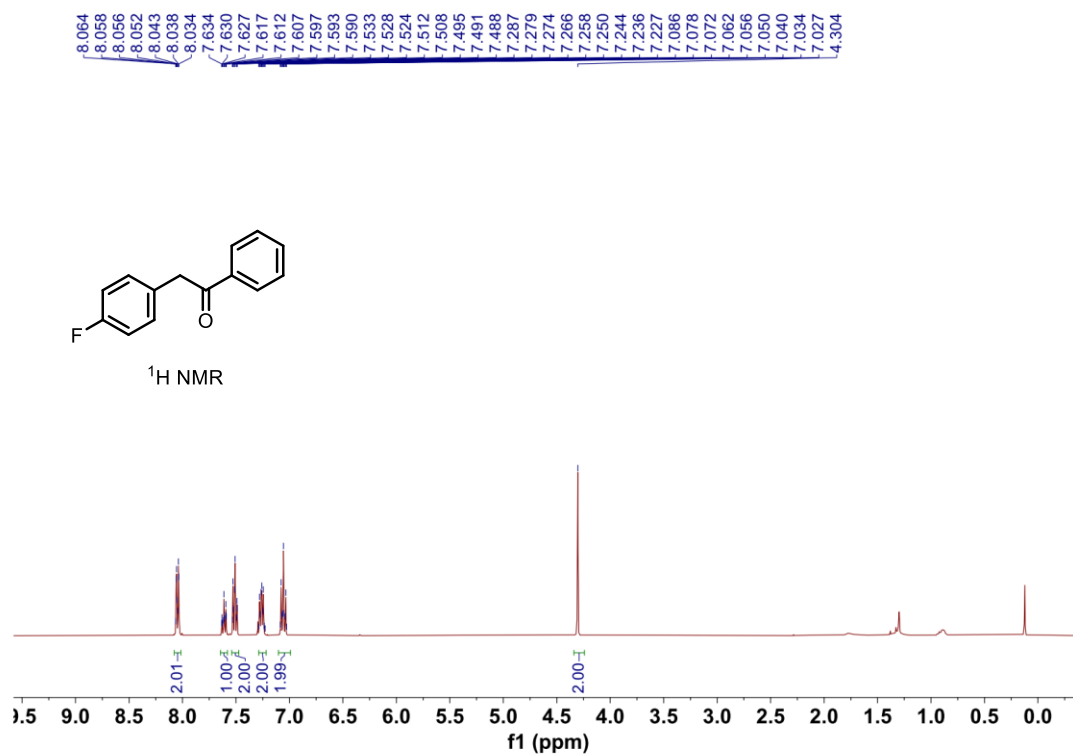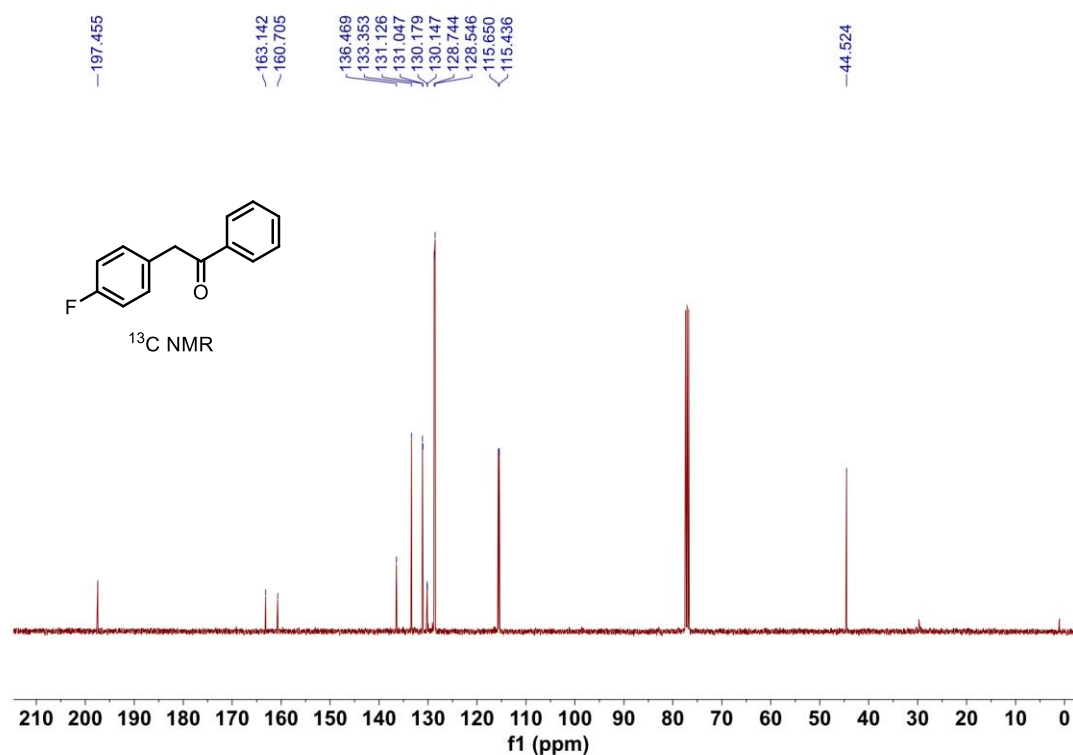

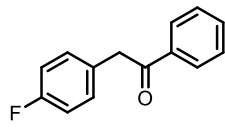

<sup>19</sup>F NMR

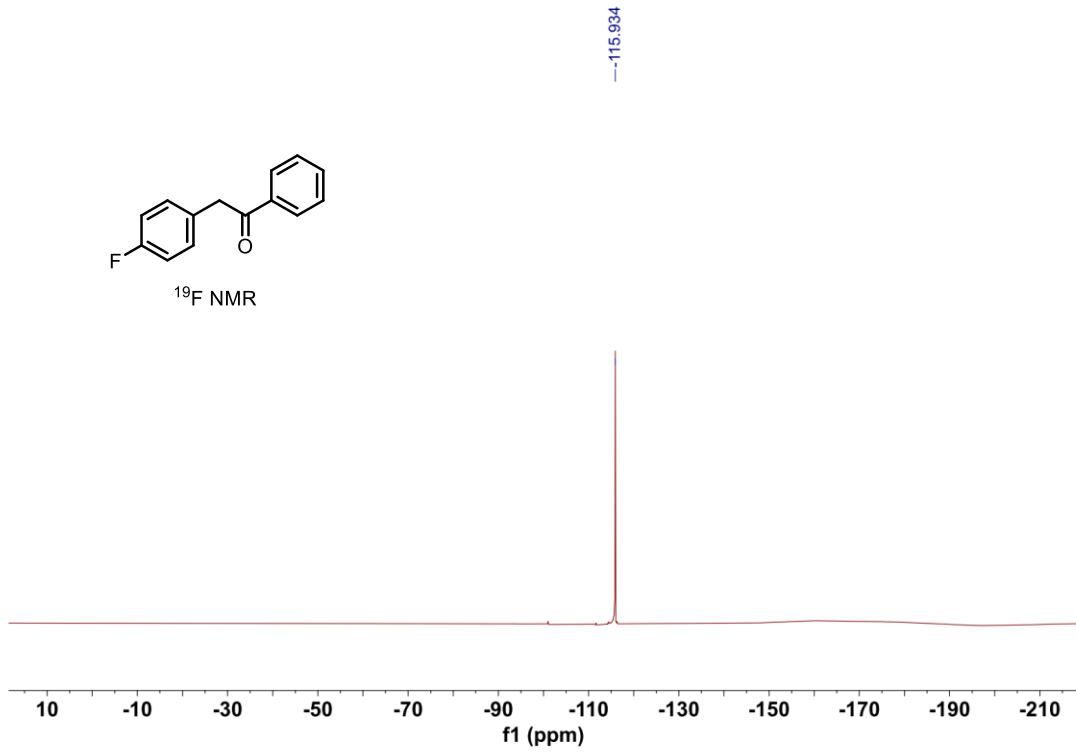

7.953  
7.949  
7.937  
7.932  
7.311  
7.296  
7.291  
7.273  
7.268  
7.259  
7.252  
7.243  
7.238  
7.076  
7.068  
7.062  
7.052  
7.046  
7.040  
7.030  
7.024  
7.016  
-4.271

-2.447

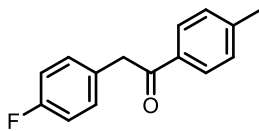

<sup>1</sup>H NMR

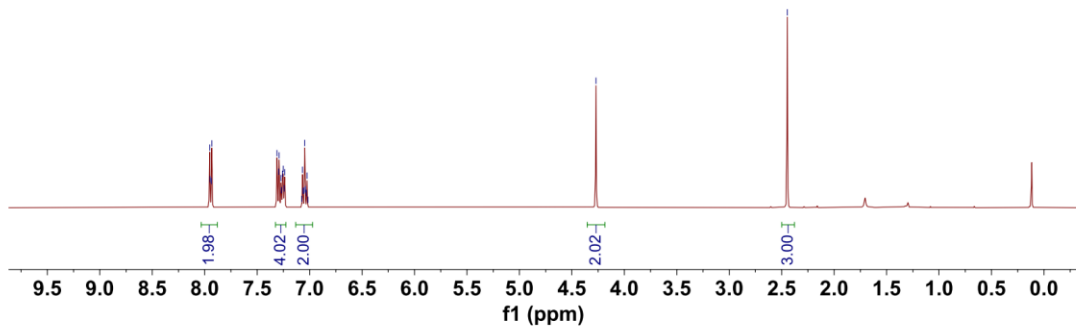

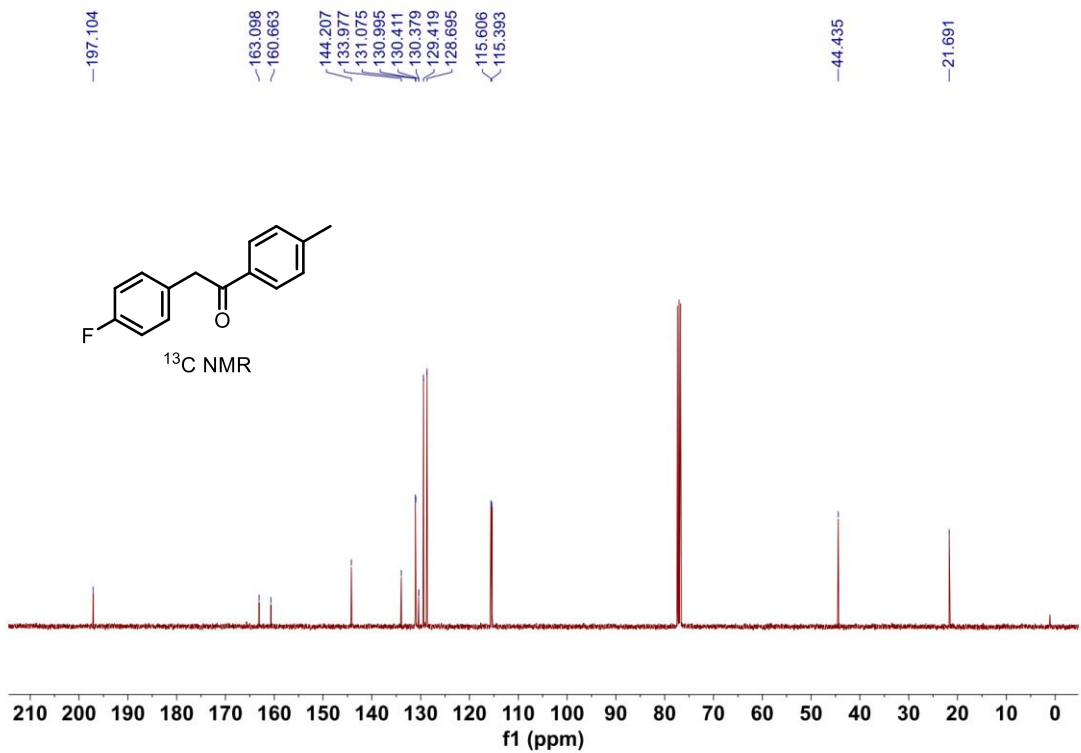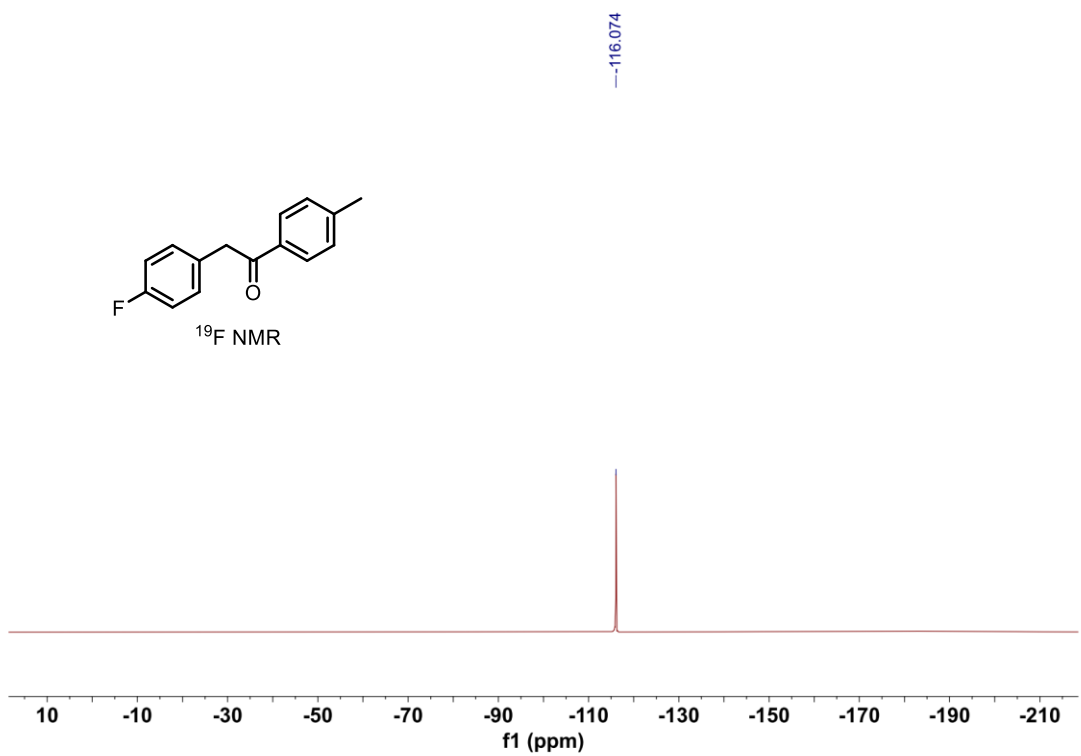



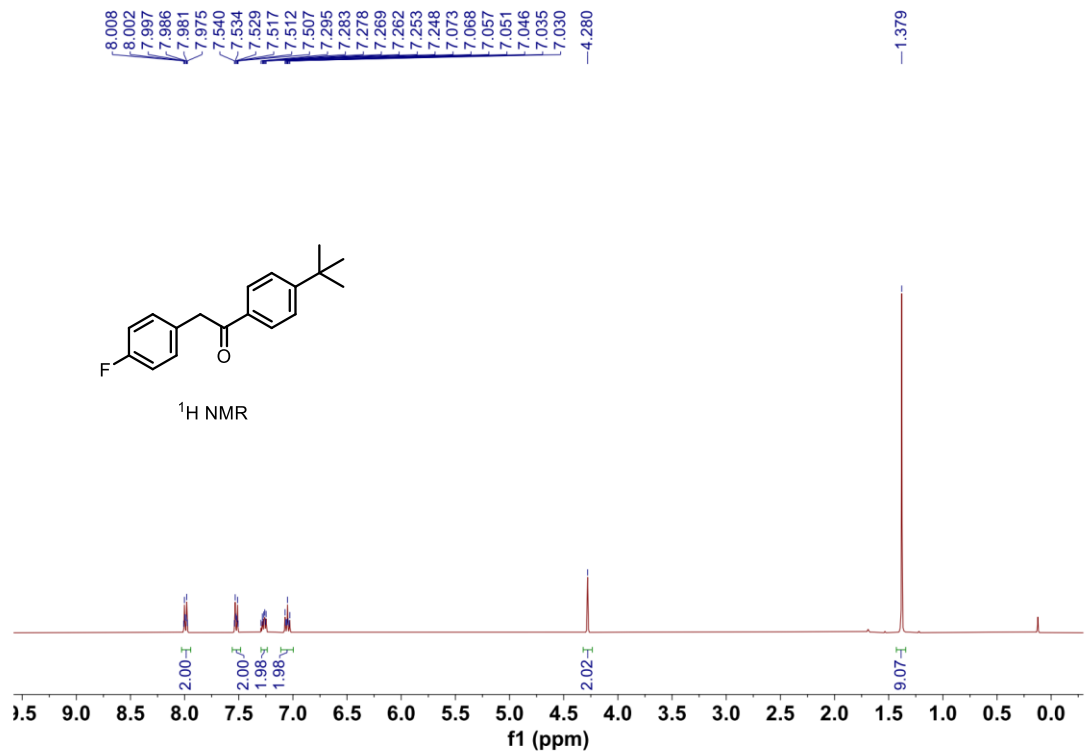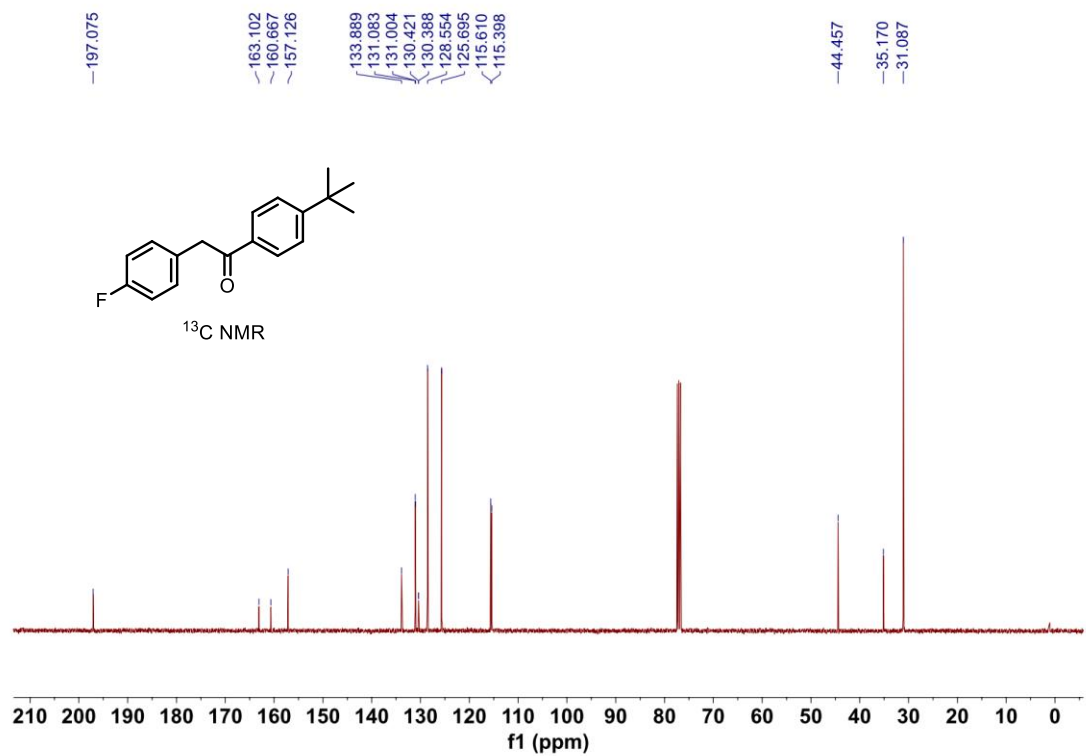

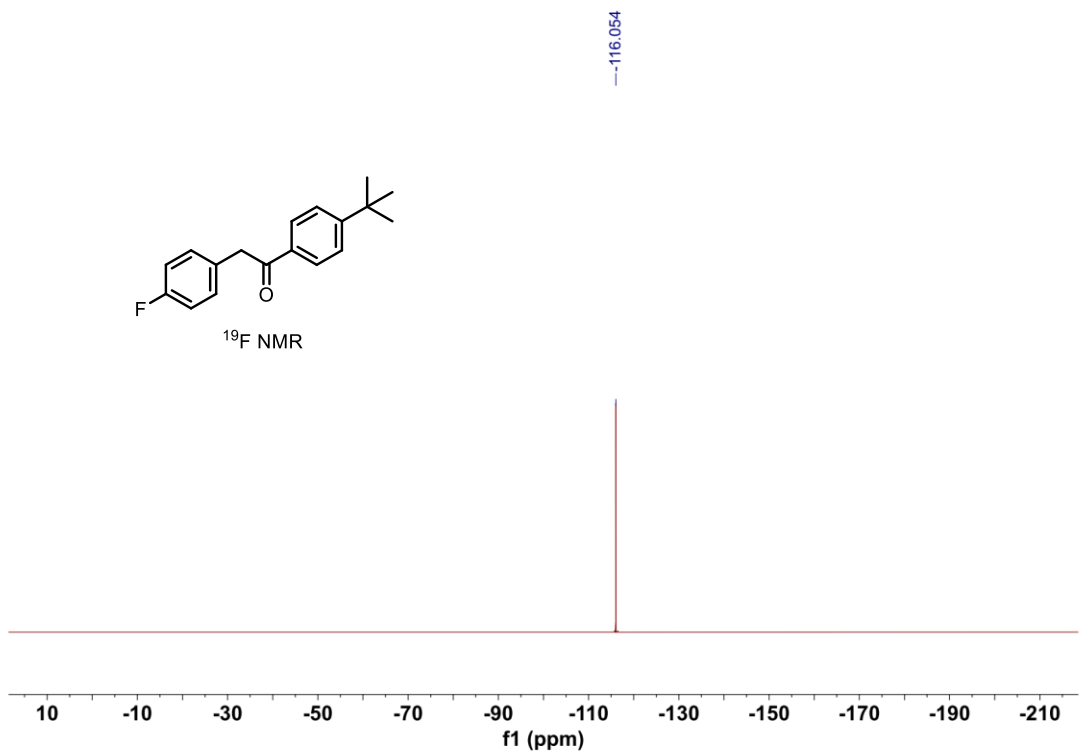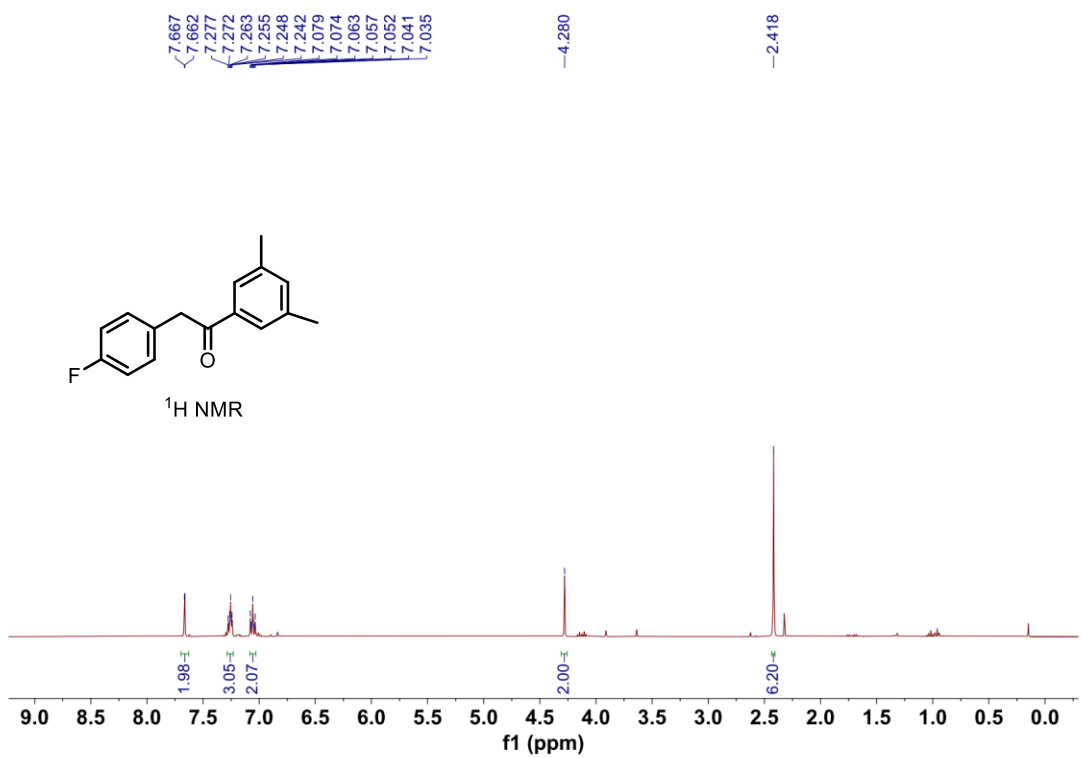

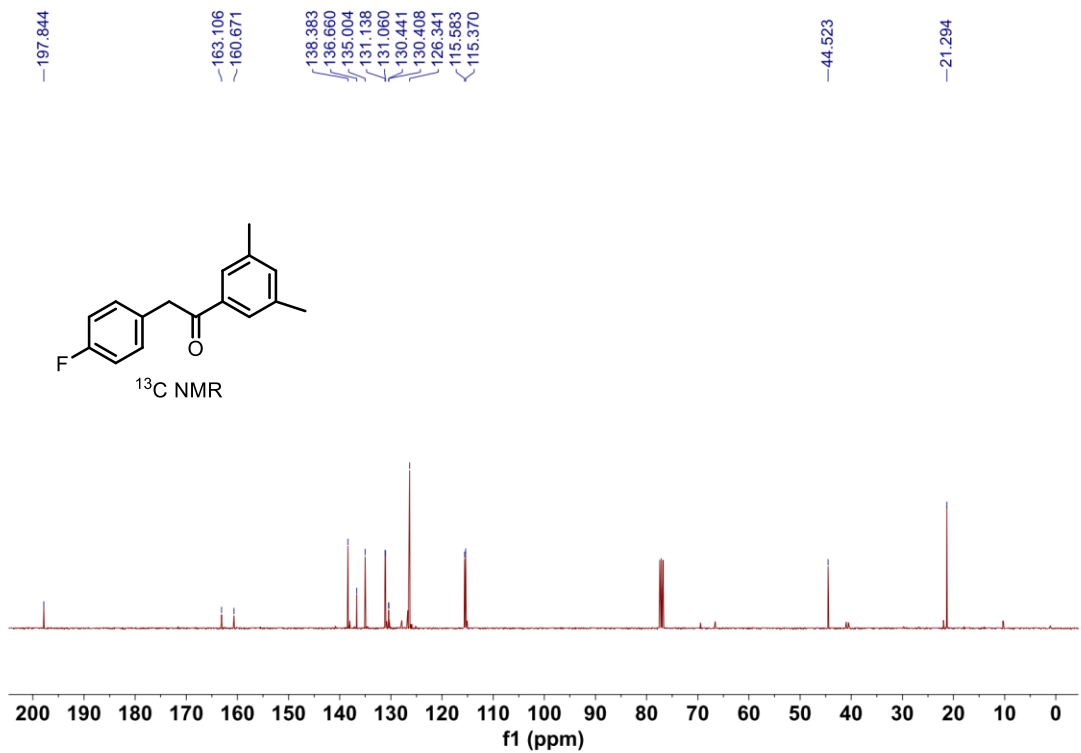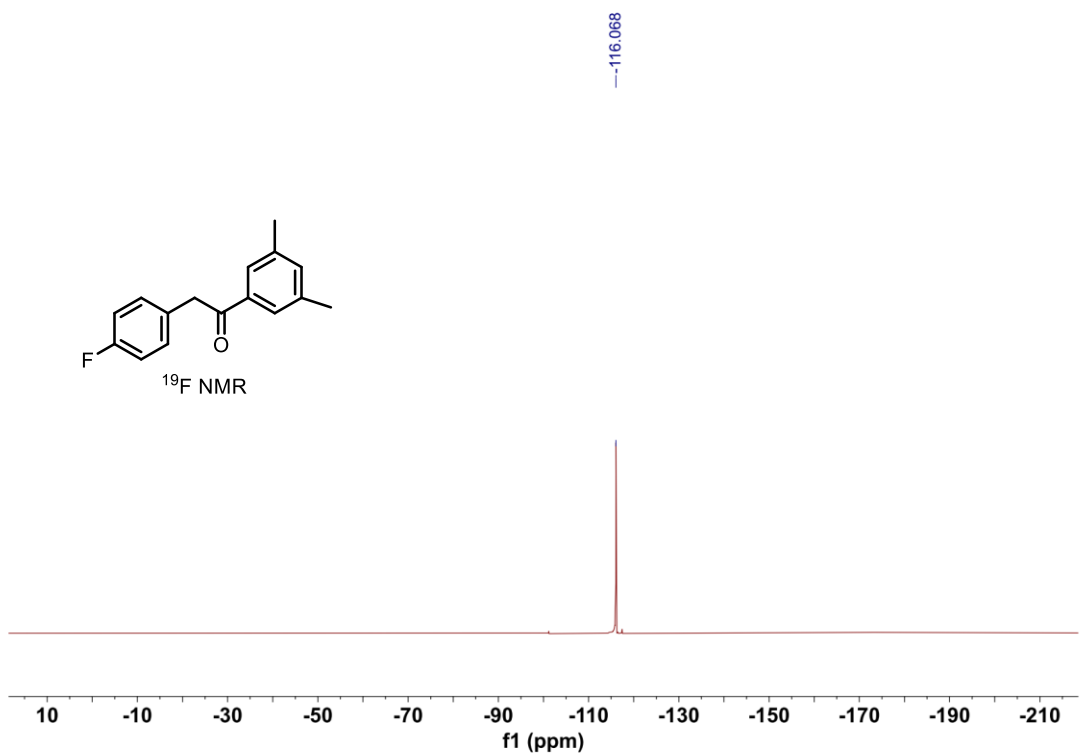

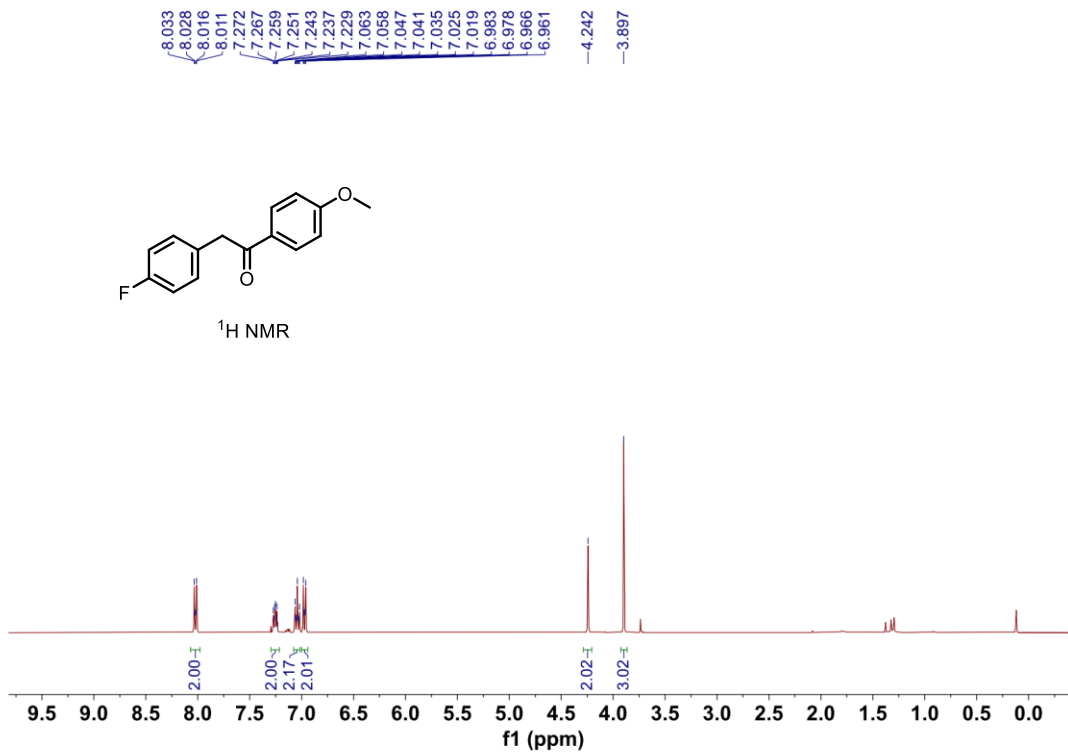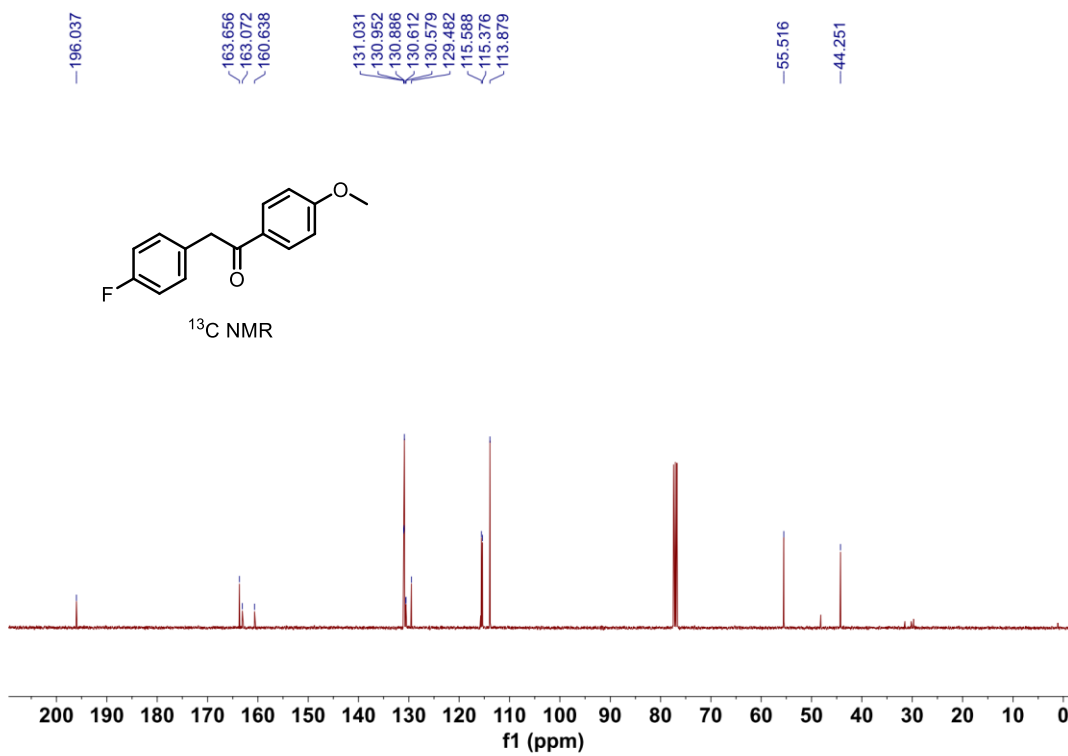

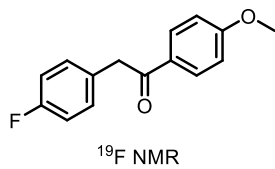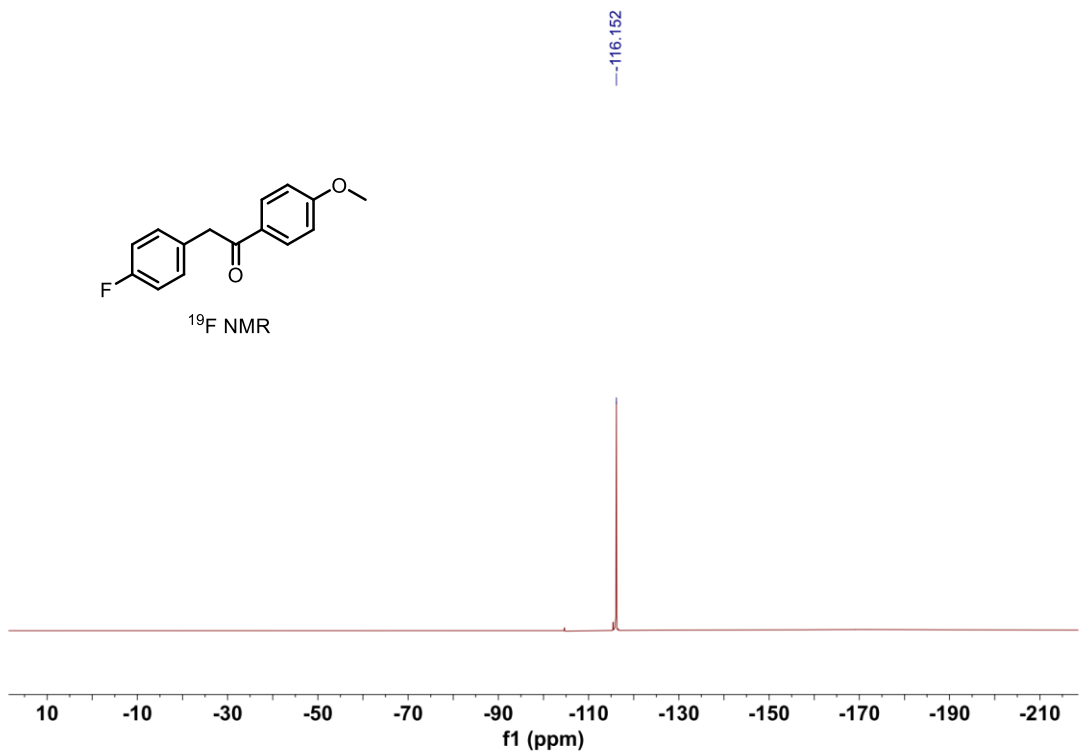

7.639  
 7.637  
 7.635  
 7.633  
 7.620  
 7.618  
 7.616  
 7.614  
 7.560  
 7.556  
 7.553  
 7.549  
 7.430  
 7.410  
 7.390  
 7.272  
 7.258  
 7.251  
 7.242  
 7.237  
 7.165  
 7.163  
 7.158  
 7.156  
 7.144  
 7.142  
 7.138  
 7.135  
 7.072  
 7.056  
 7.050  
 7.044  
 7.028  
 4.875

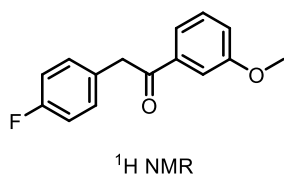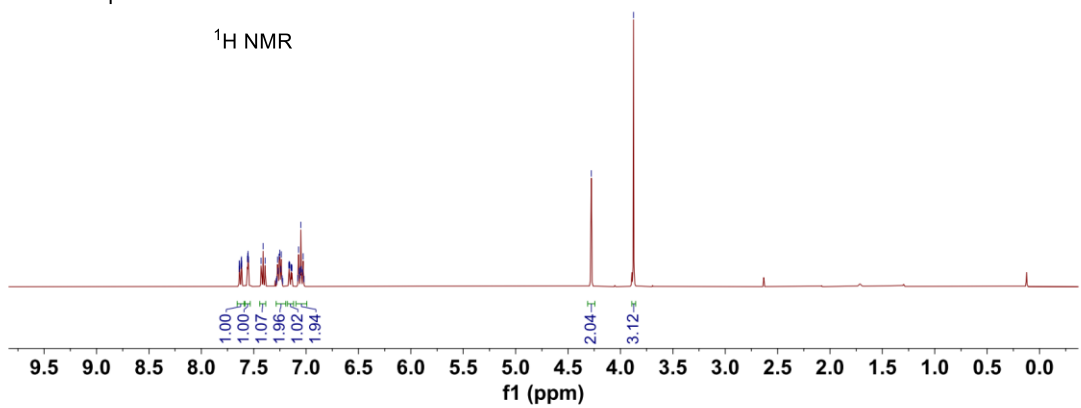

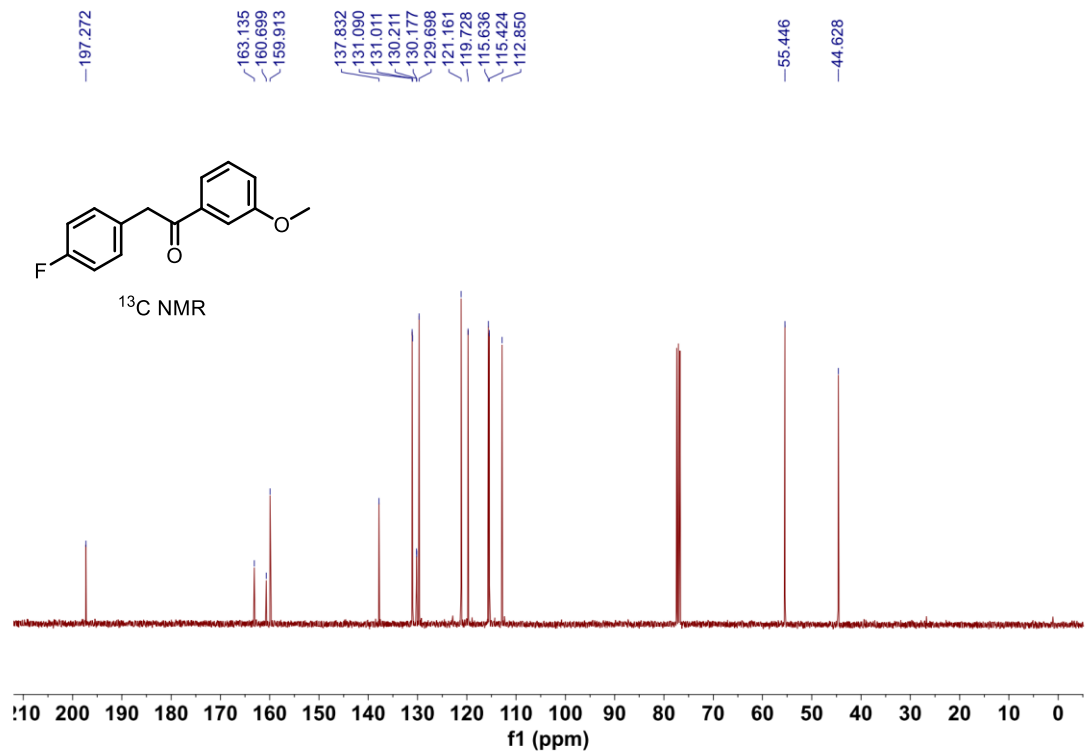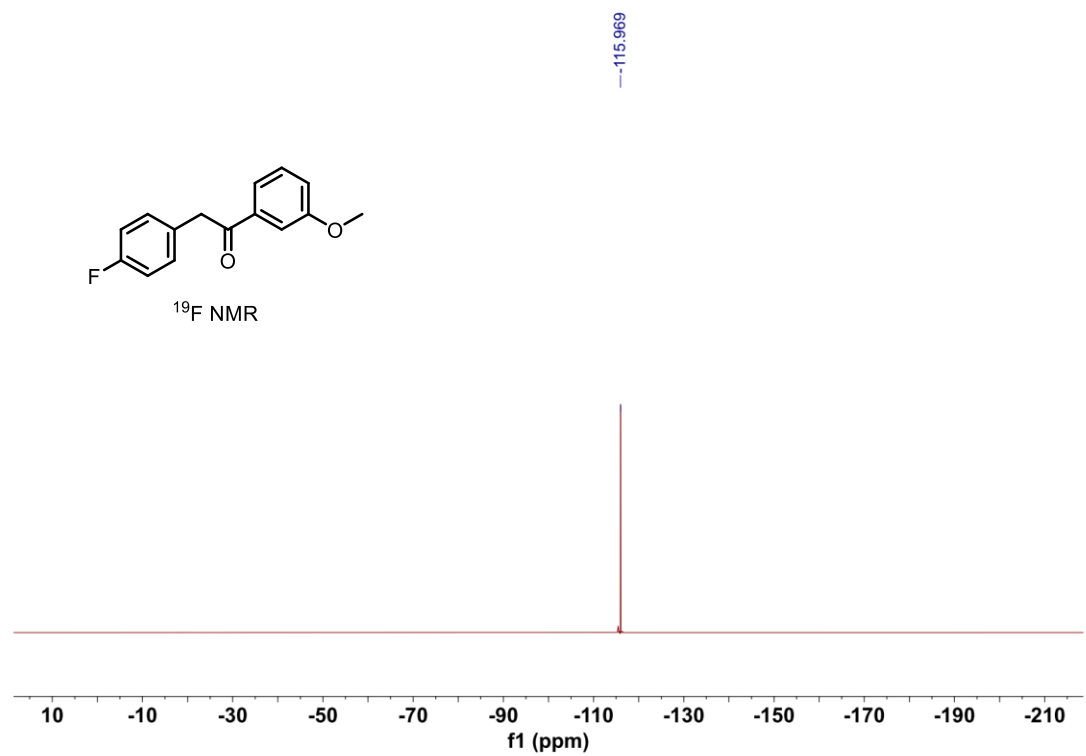

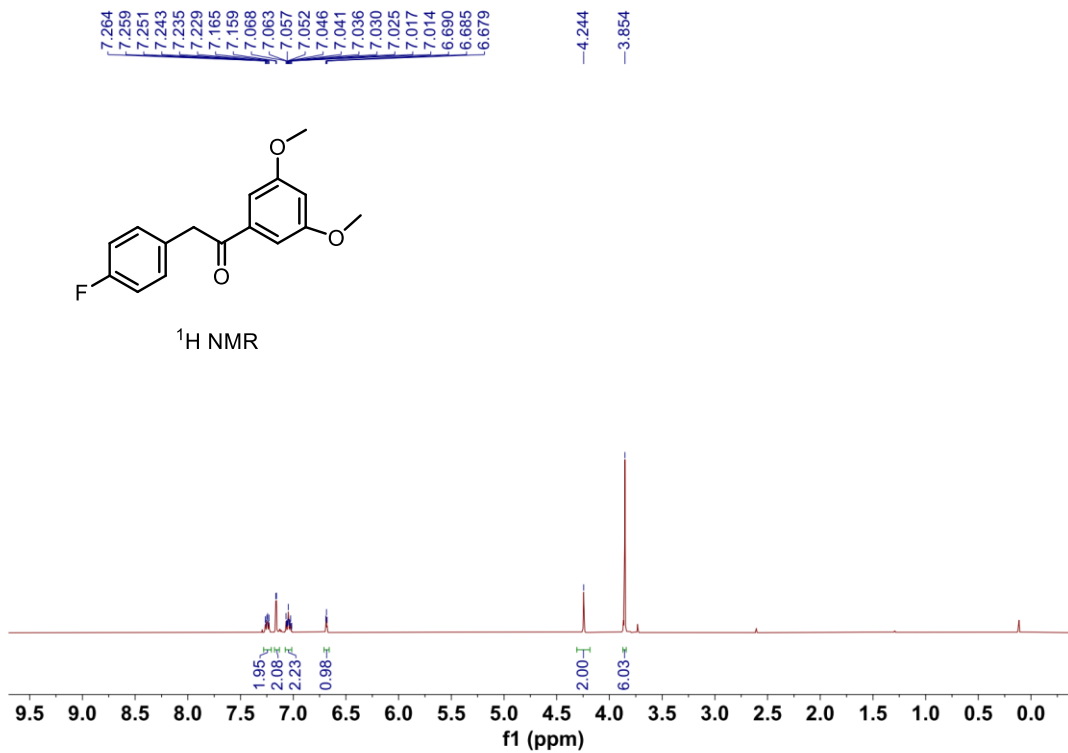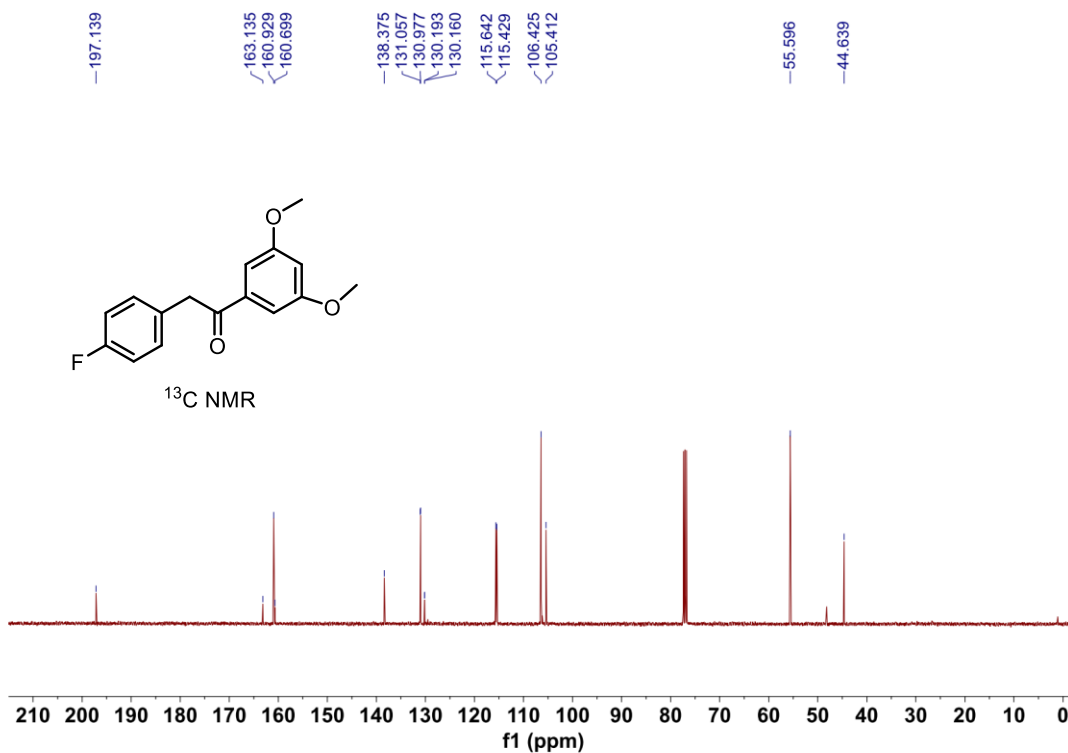

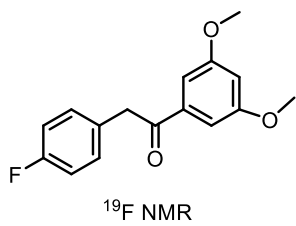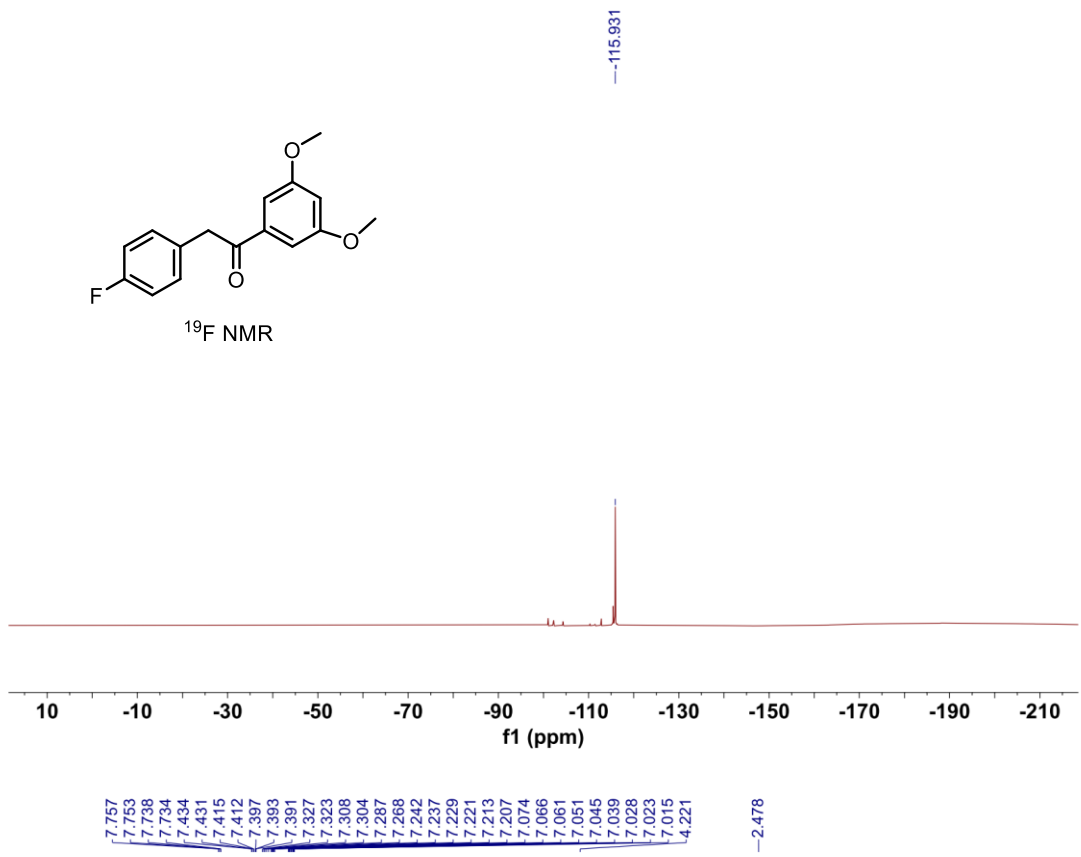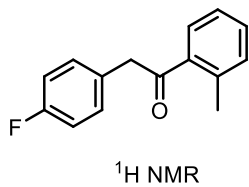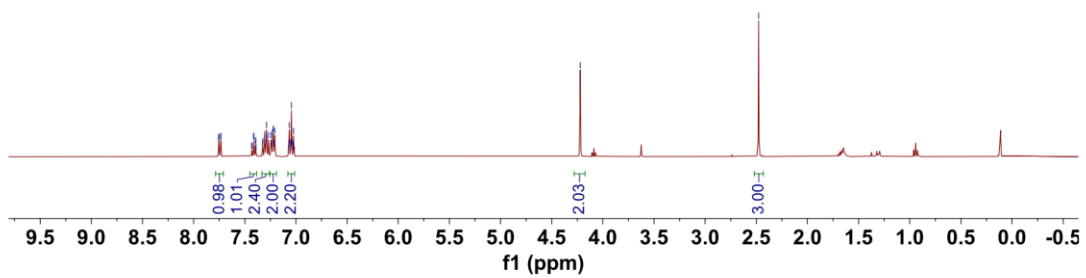



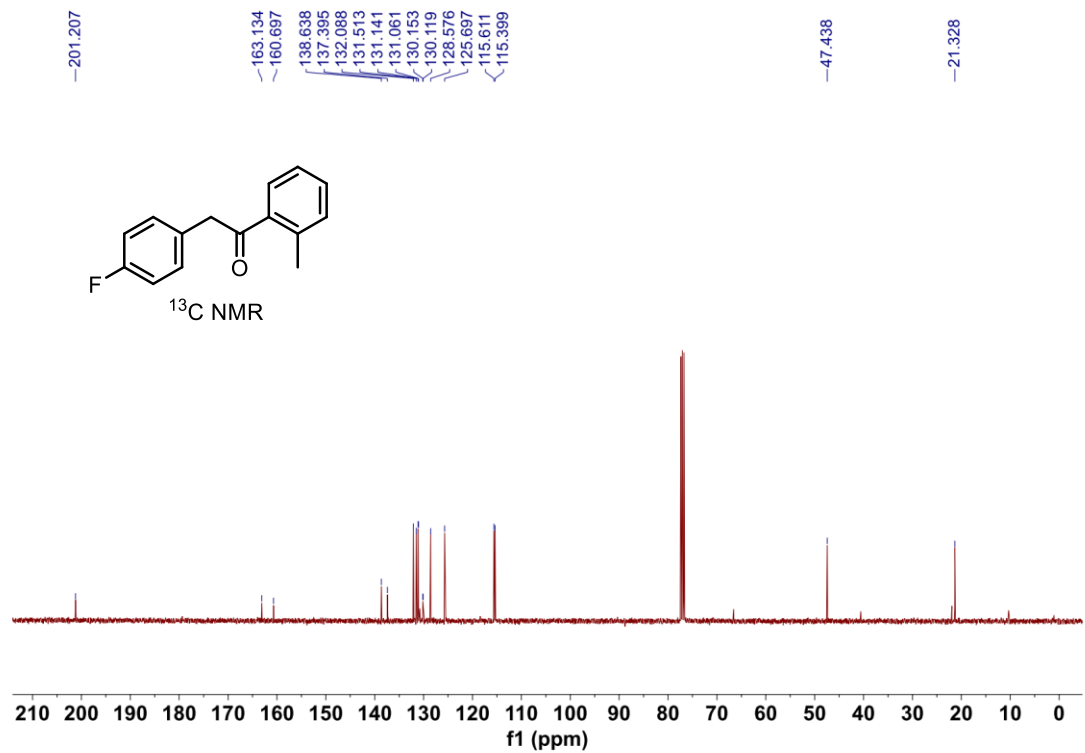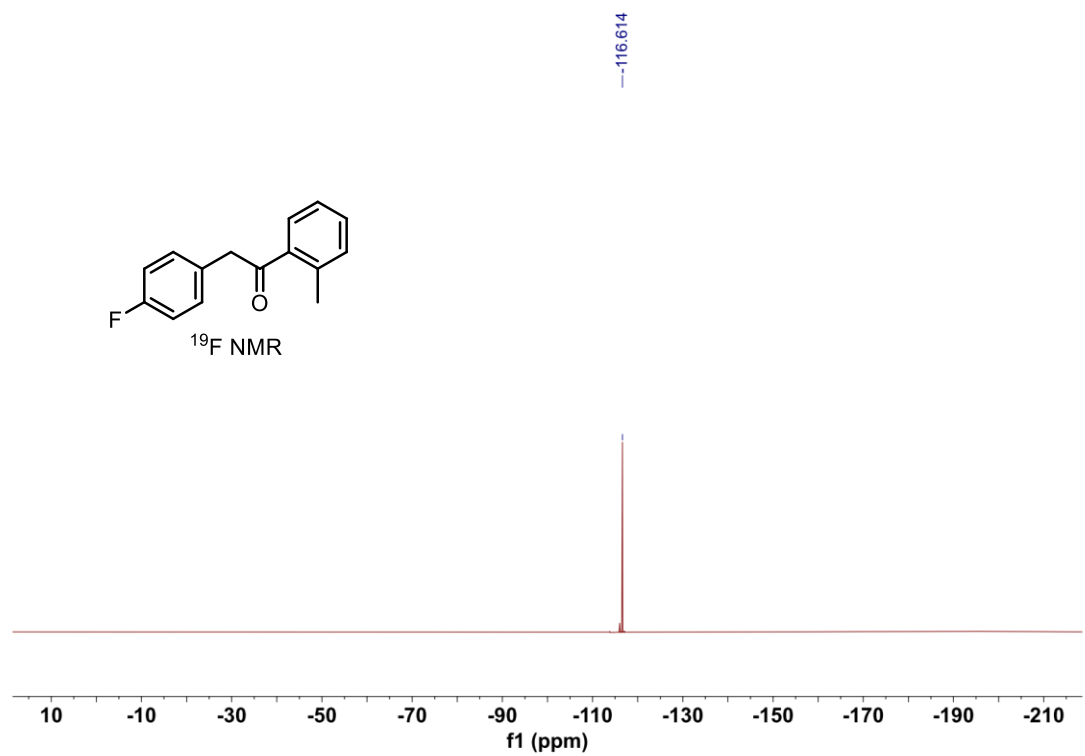

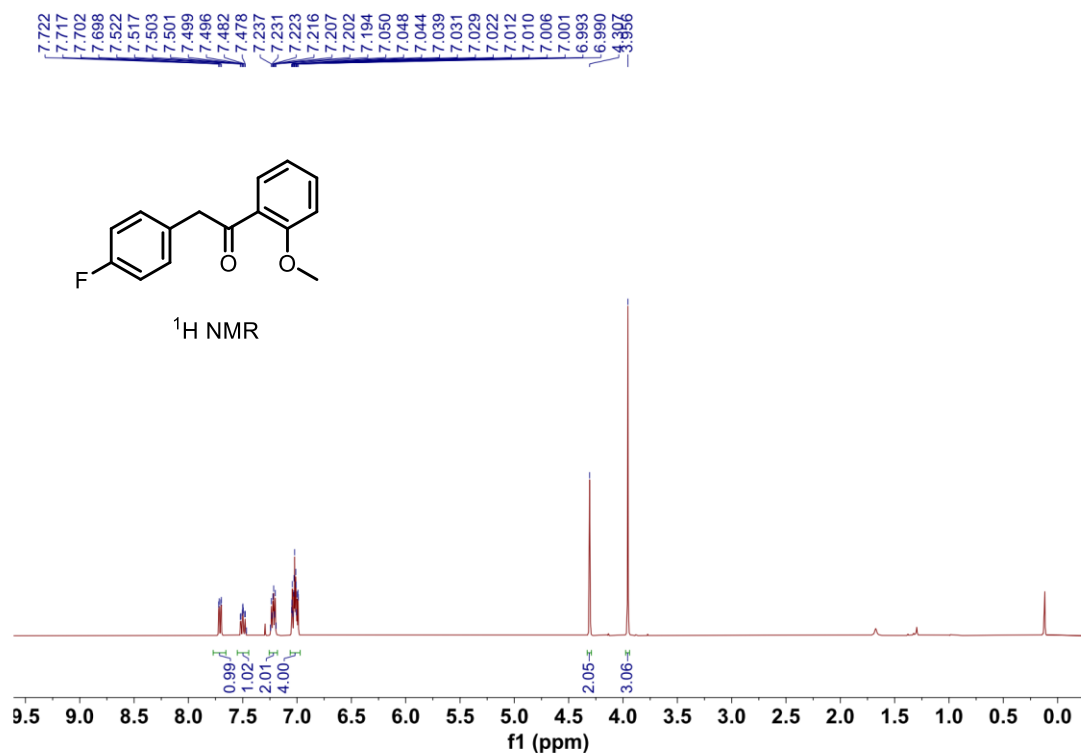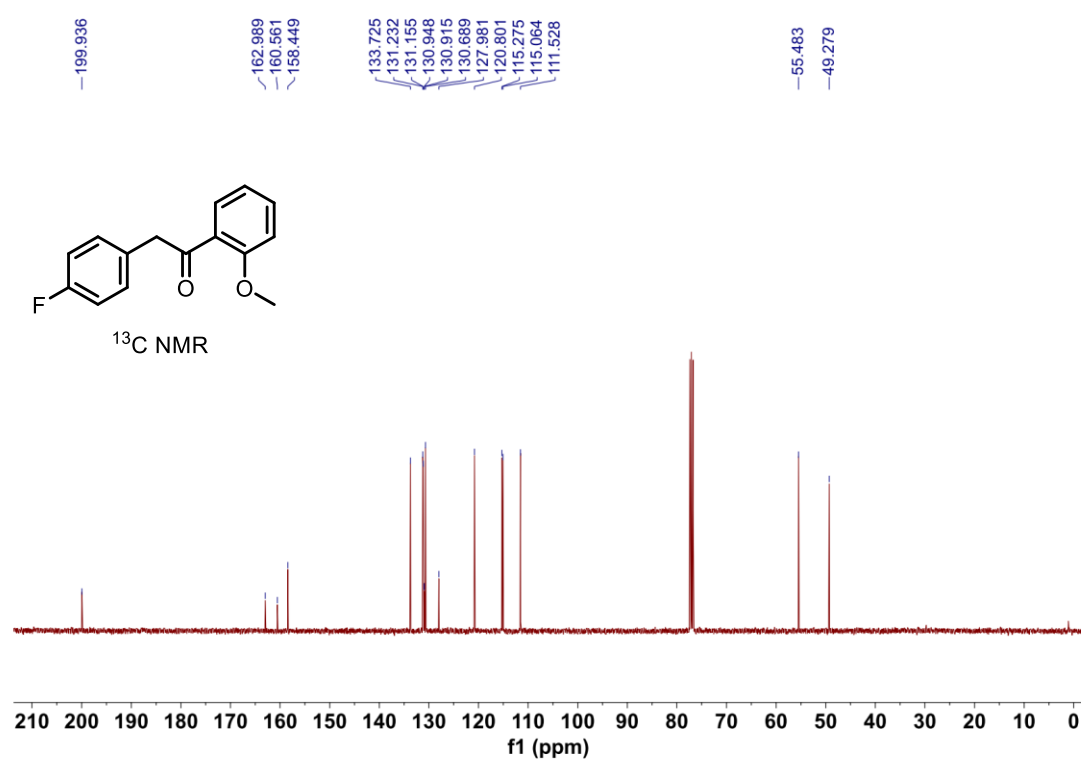

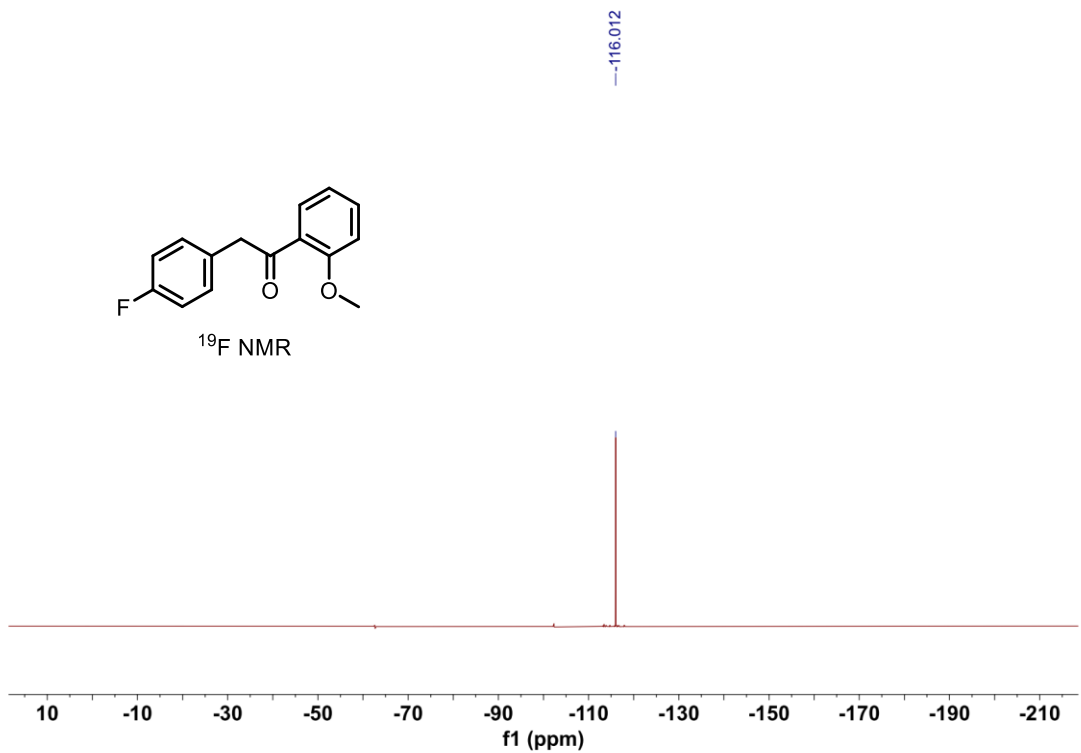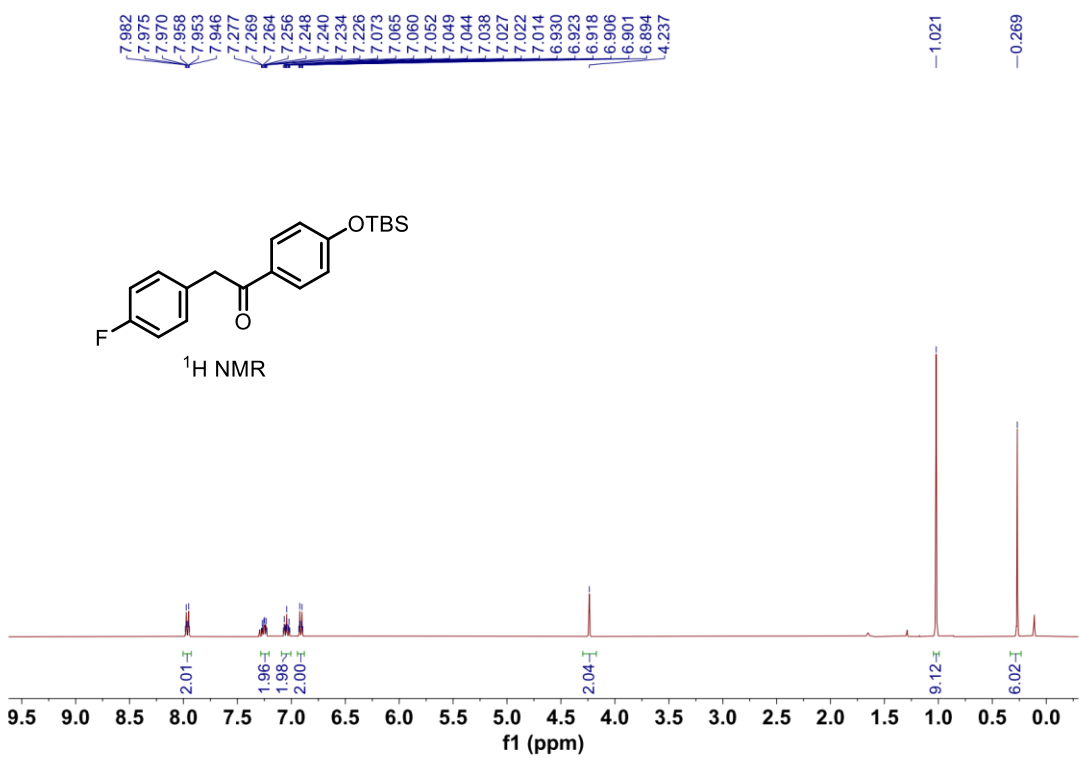

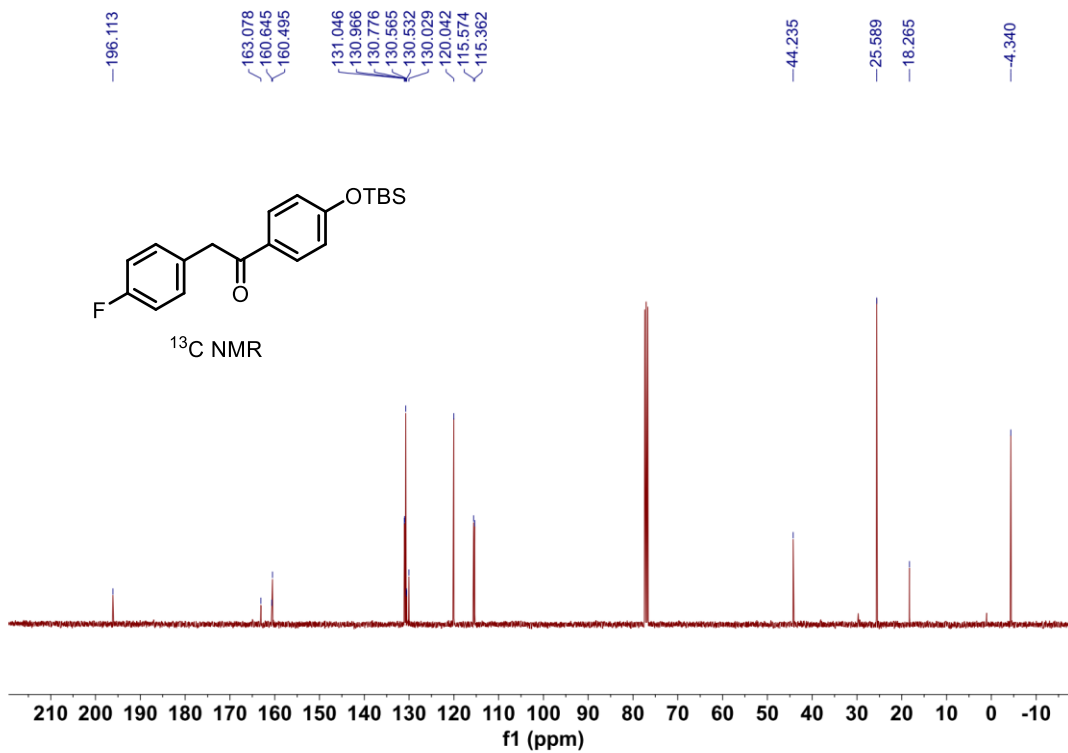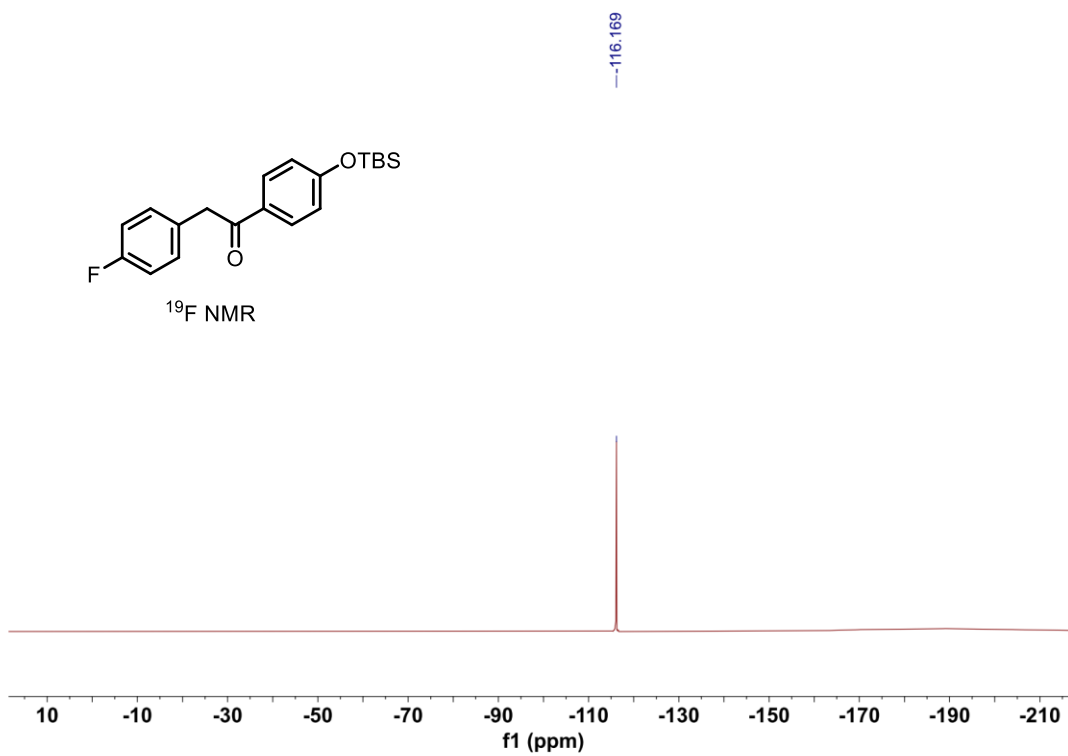

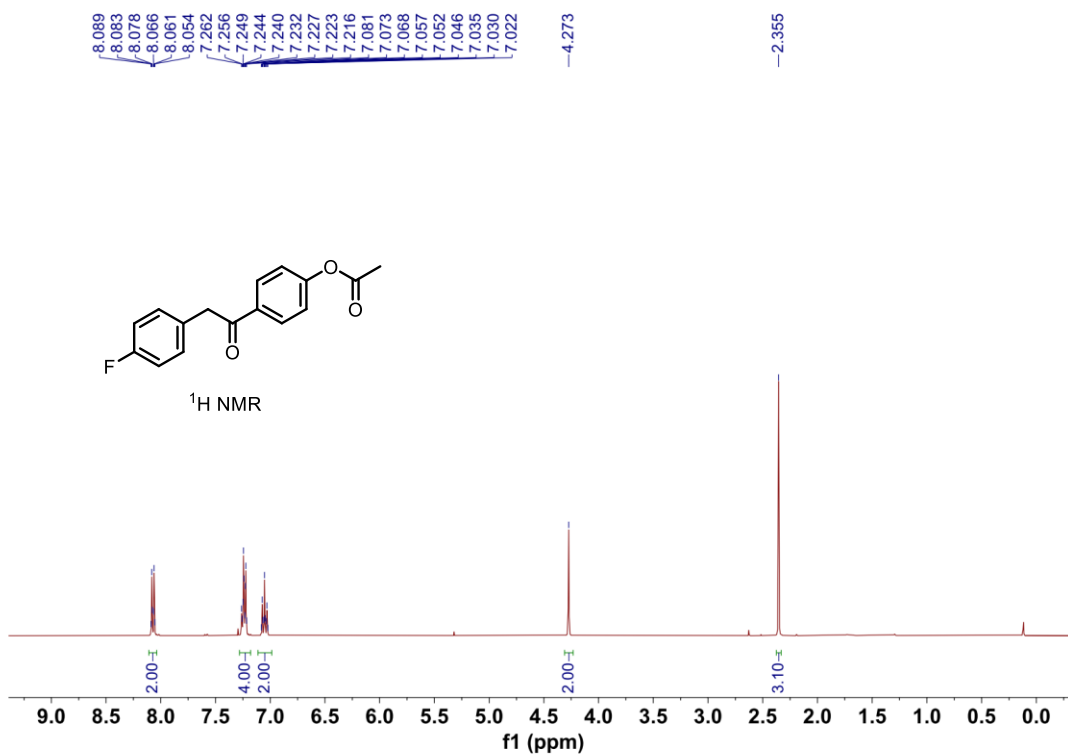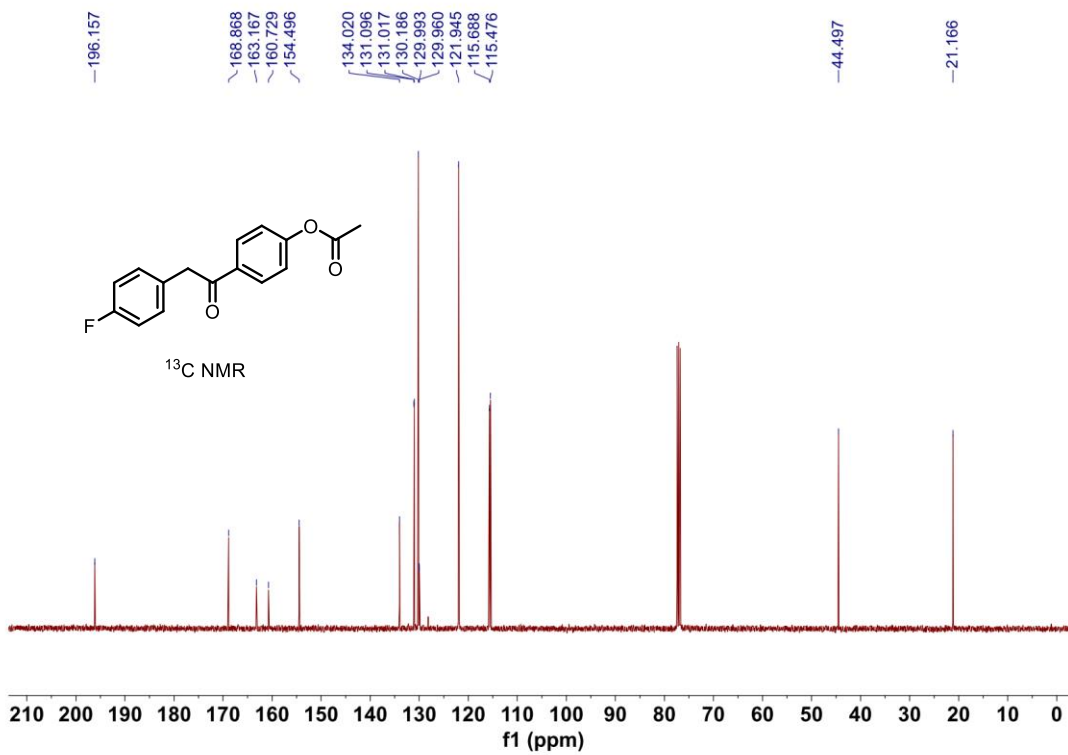

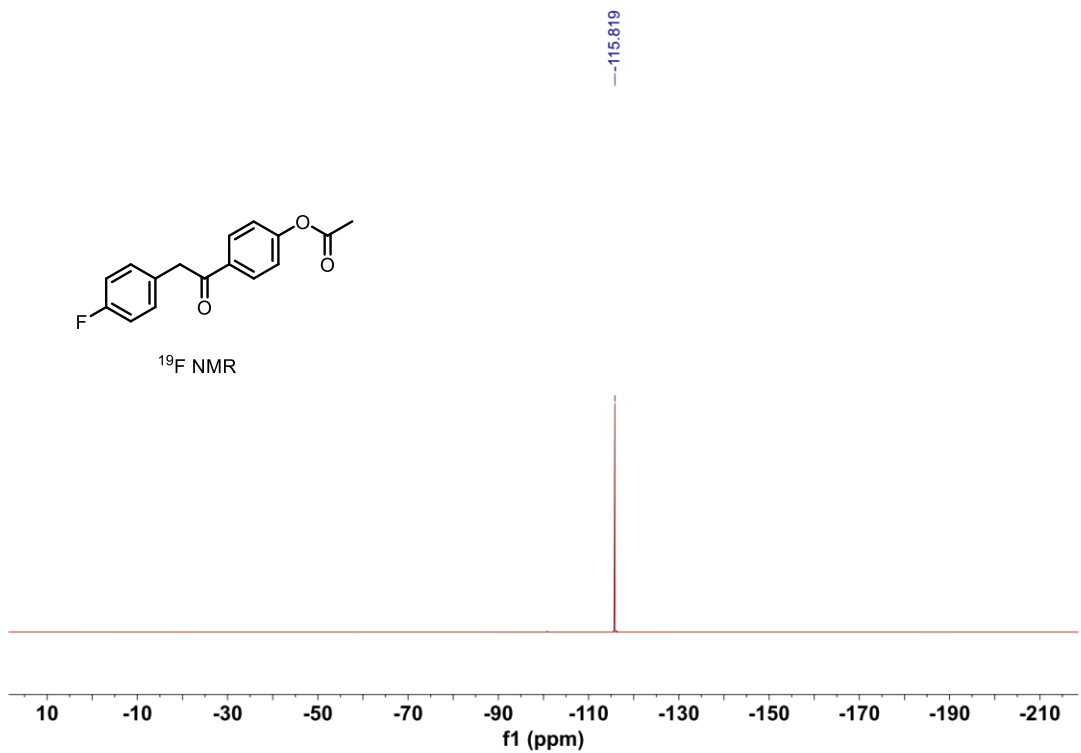

8.035  
8.031  
8.019  
8.015  
7.504  
7.484  
7.279  
7.273  
7.265  
7.258  
7.249  
7.244  
7.072  
7.066  
7.056  
7.050  
7.044  
7.034  
7.028  
-4.931  
-4.290  
1.272  
1.258  
1.252  
1.242  
1.235  
1.232  
1.224  
1.215  
1.199  
1.184  
1.144  
1.128

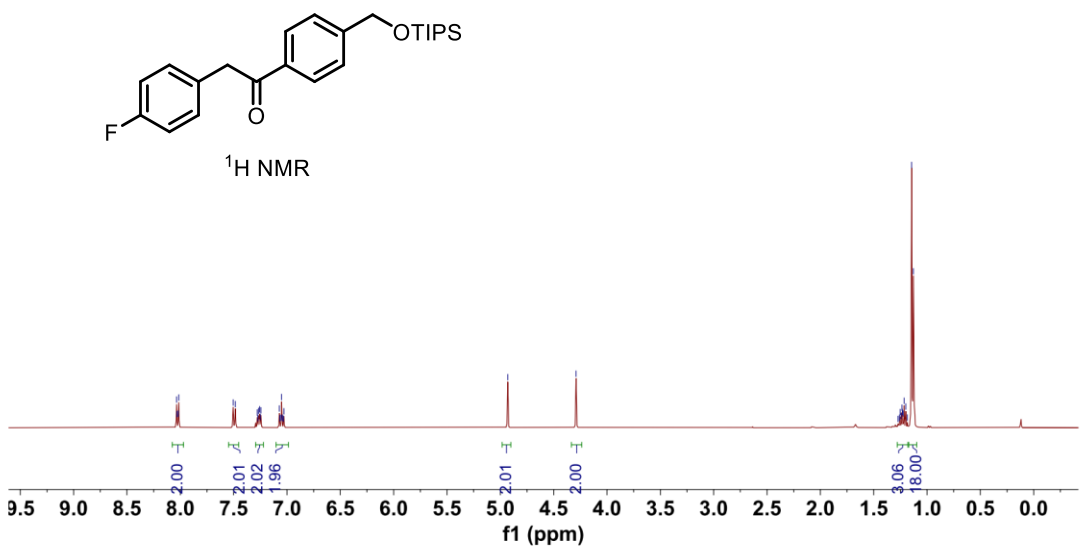

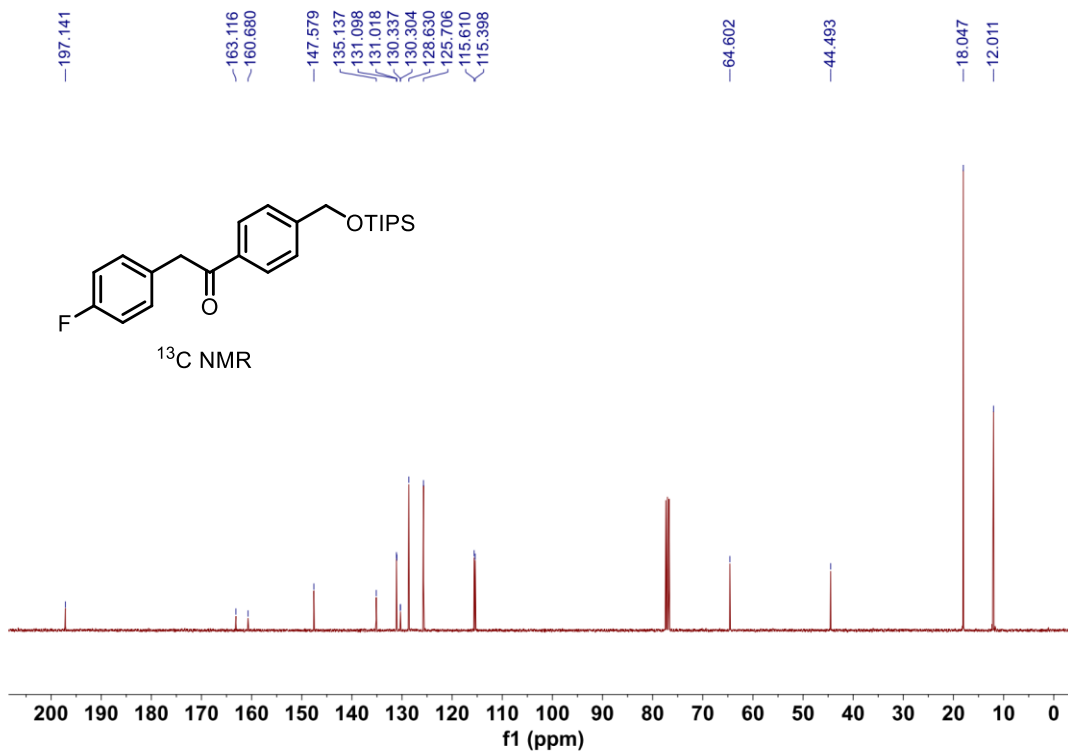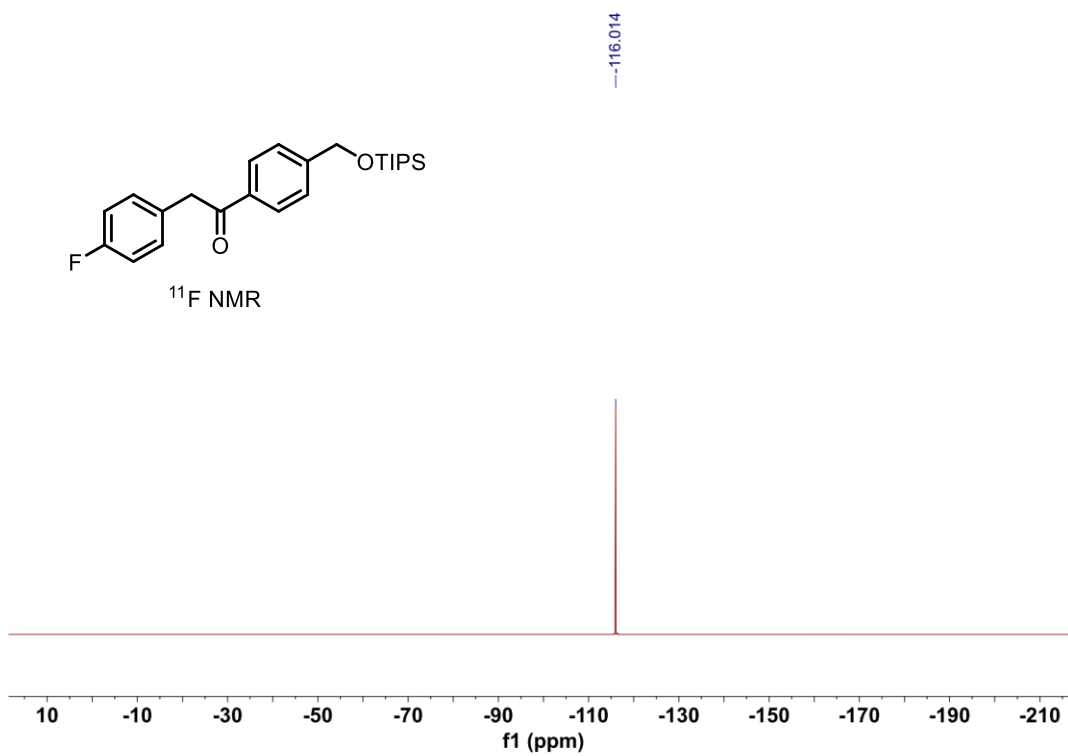

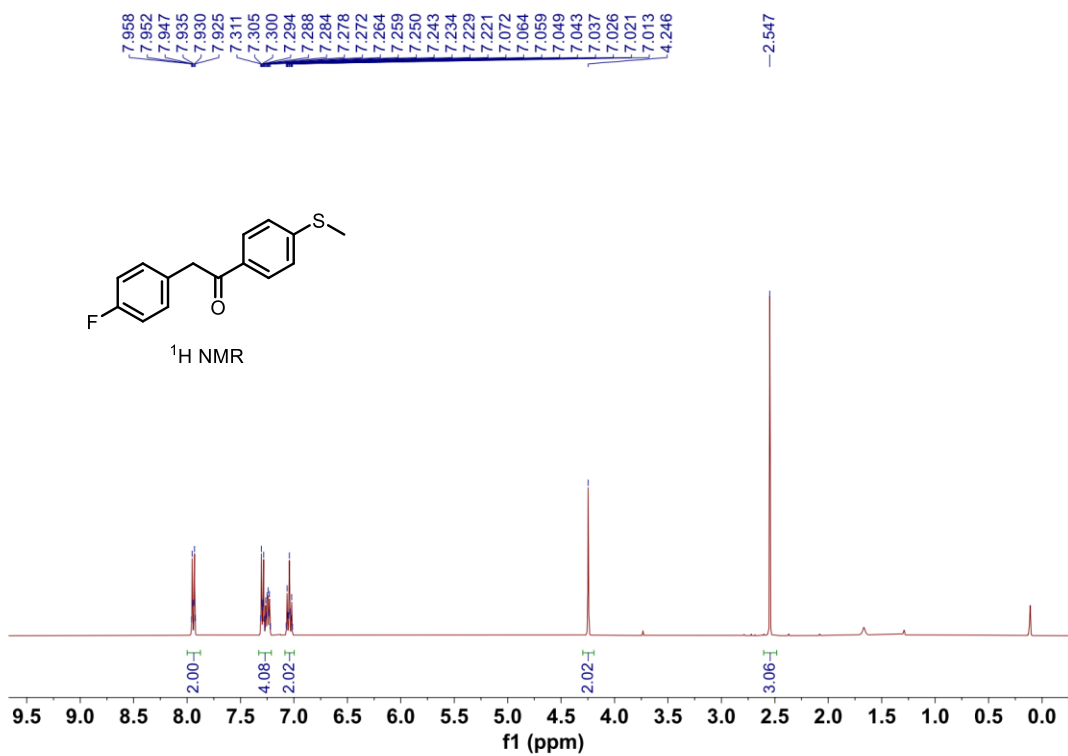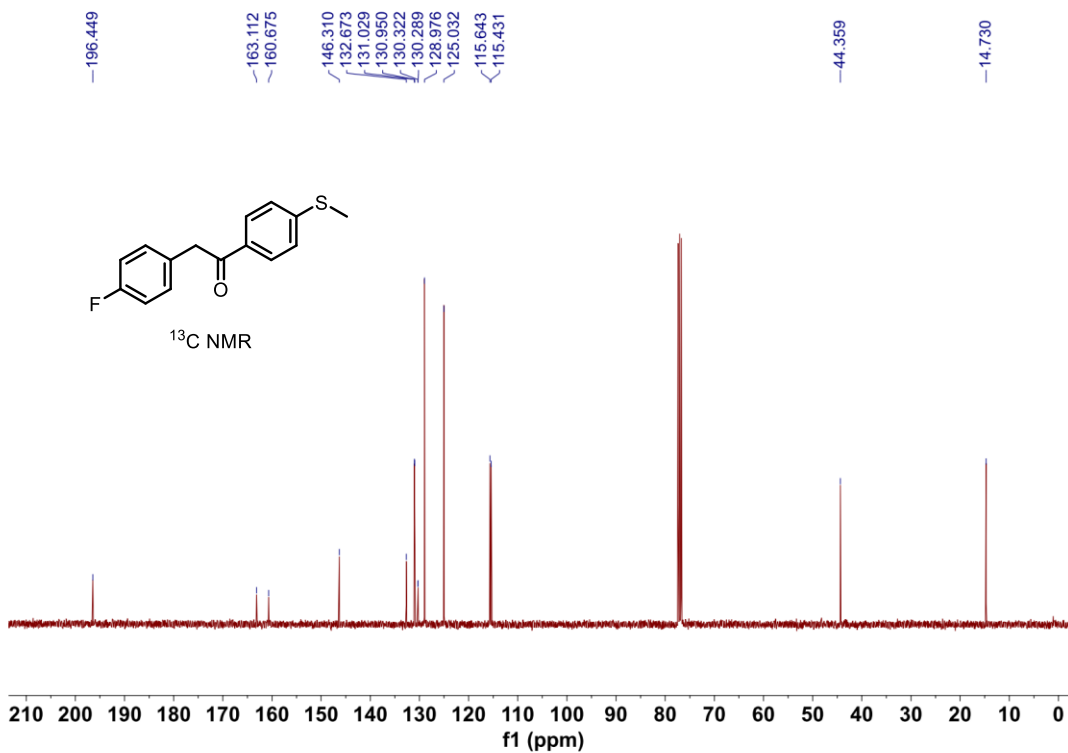



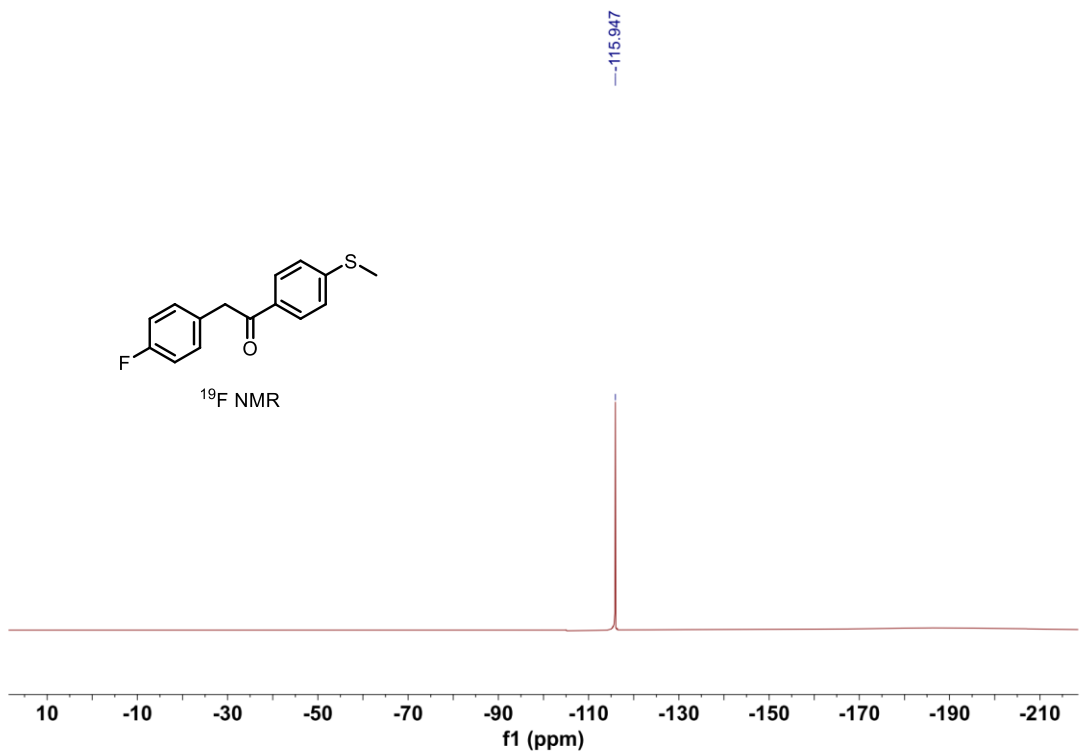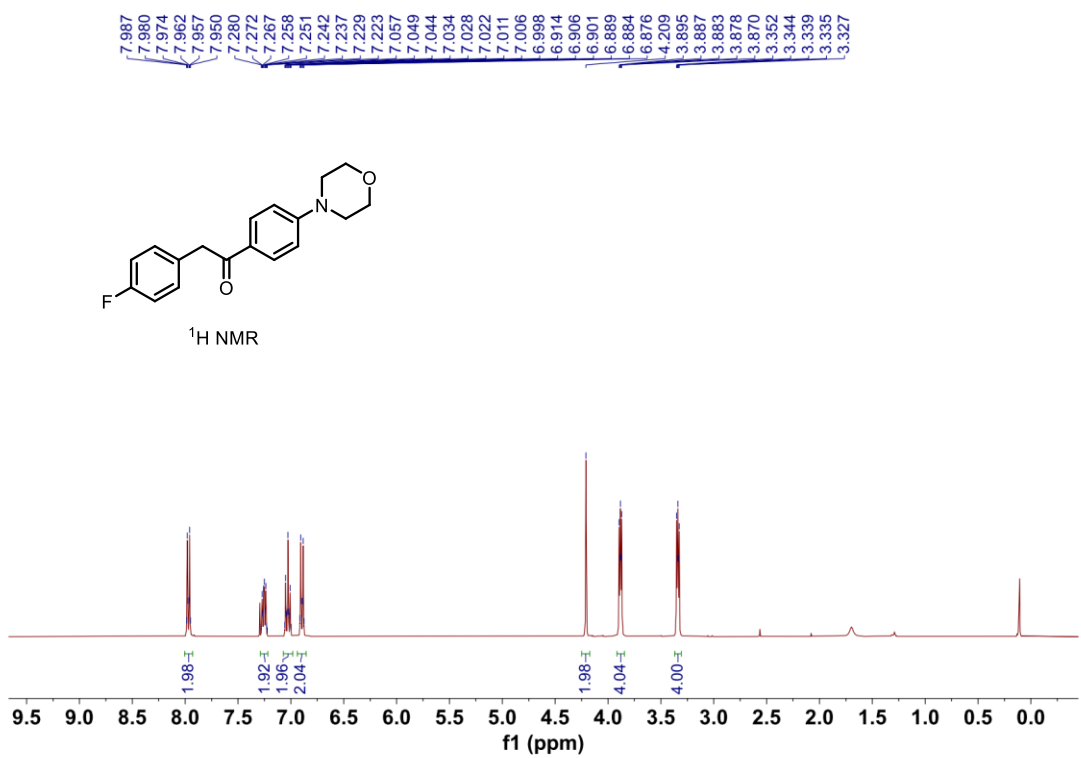

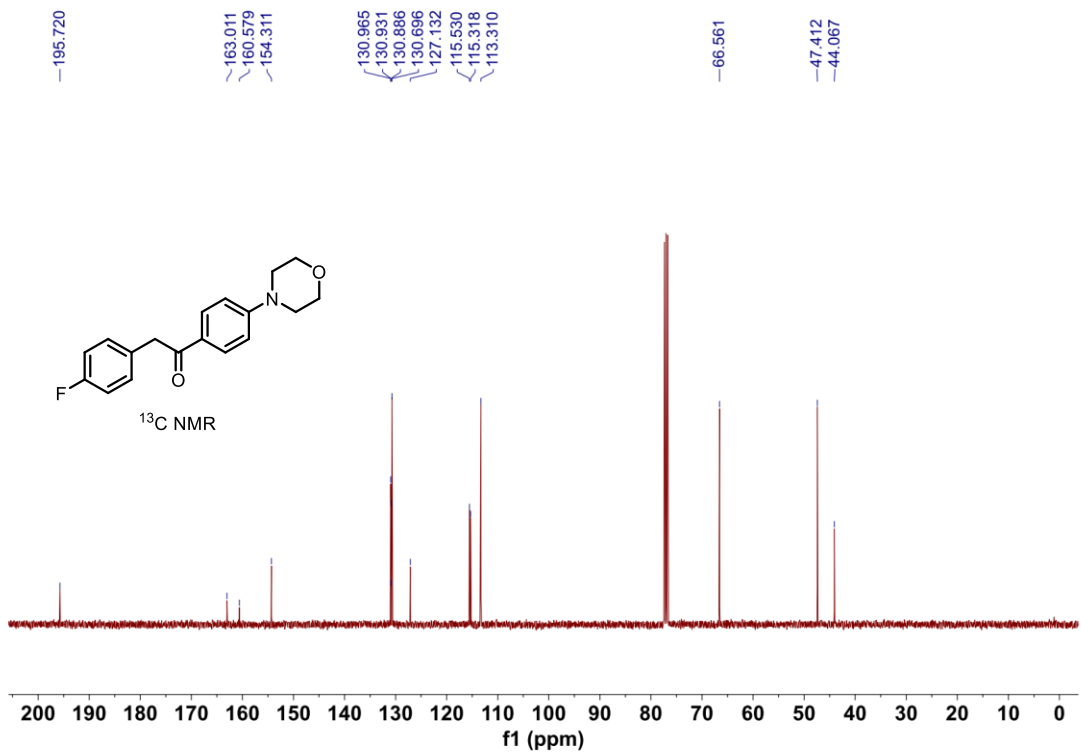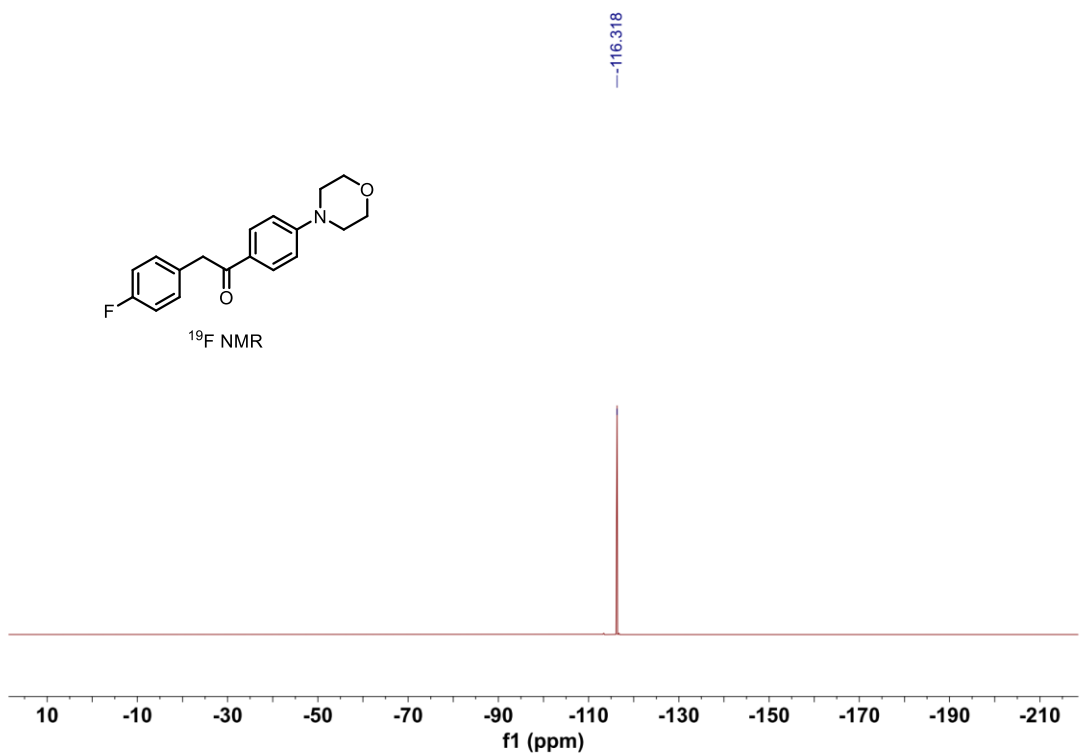

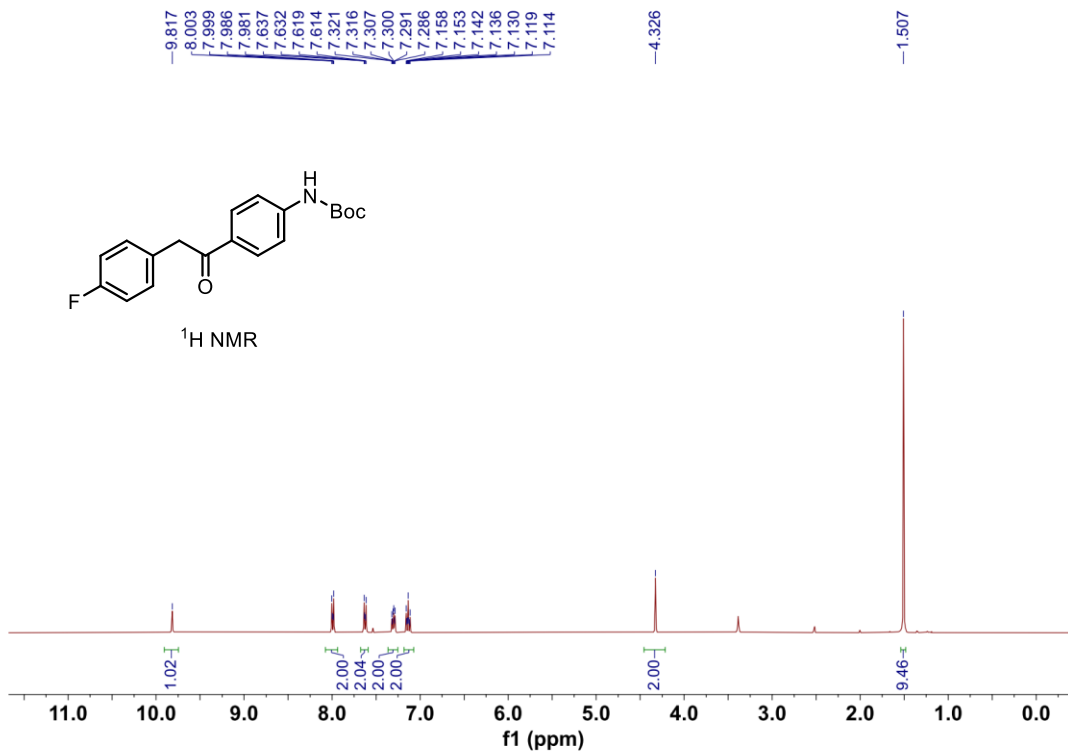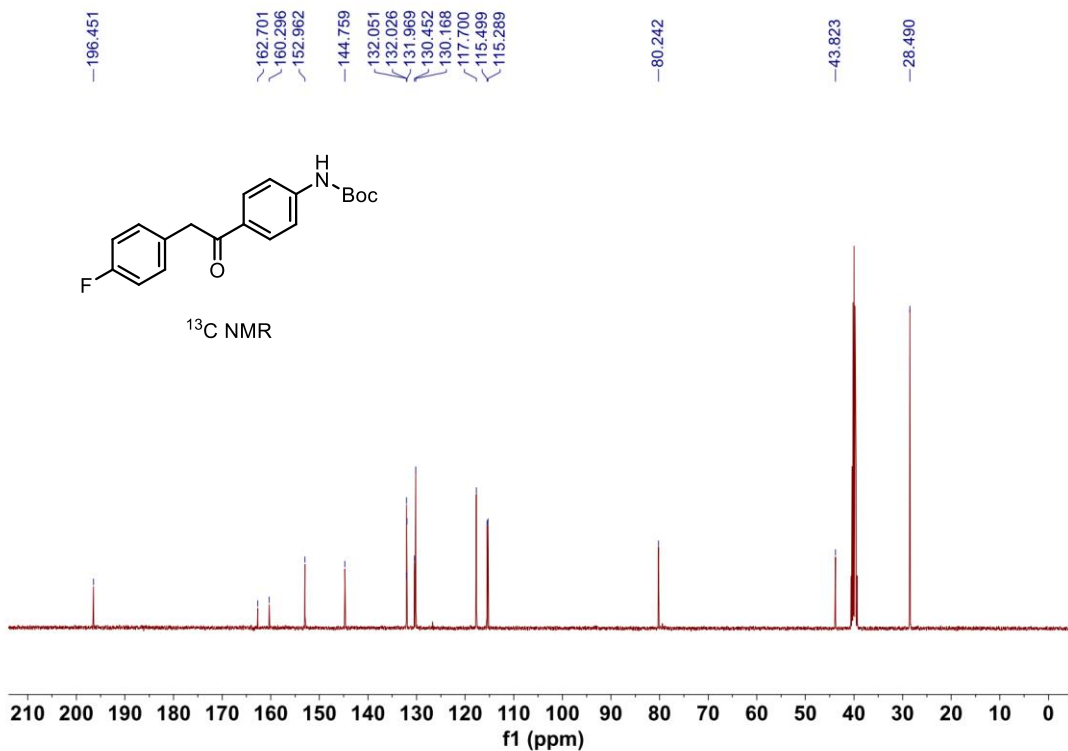

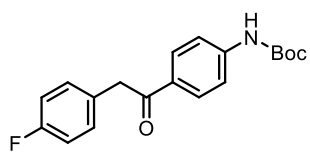

<sup>19</sup>F NMR

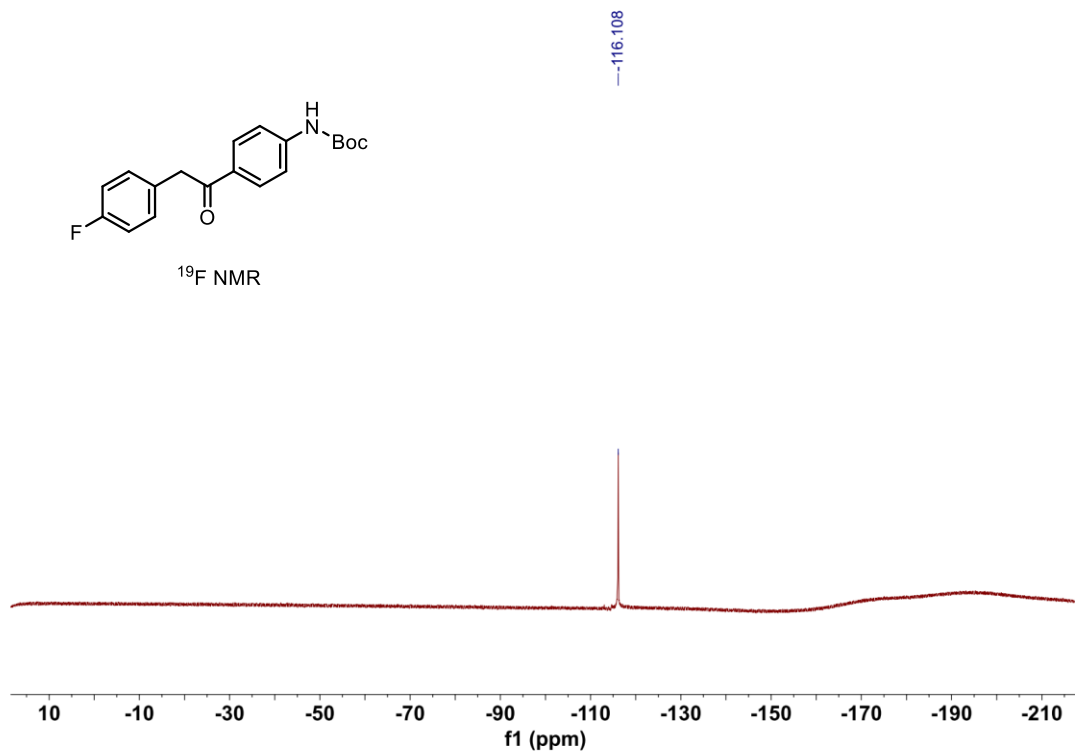

8.047  
8.039  
8.034  
8.022  
8.017  
8.009  
7.537  
7.533  
7.519  
7.514  
7.500  
7.495  
7.404  
7.400  
7.391  
7.385  
7.380  
7.371  
7.366  
7.360  
7.352  
7.347  
7.271  
7.266  
7.257  
7.250  
7.241  
7.236  
7.230  
7.227  
7.221  
7.209  
7.183  
7.180  
7.168  
7.165  
7.147  
7.143  
7.139  
7.122  
7.119  
7.079  
7.071  
7.066  
7.061  
7.054  
7.049  
7.044  
7.039  
7.028  
7.023  
7.014  
5.231  
4.243

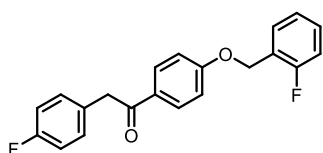

<sup>1</sup>H NMR

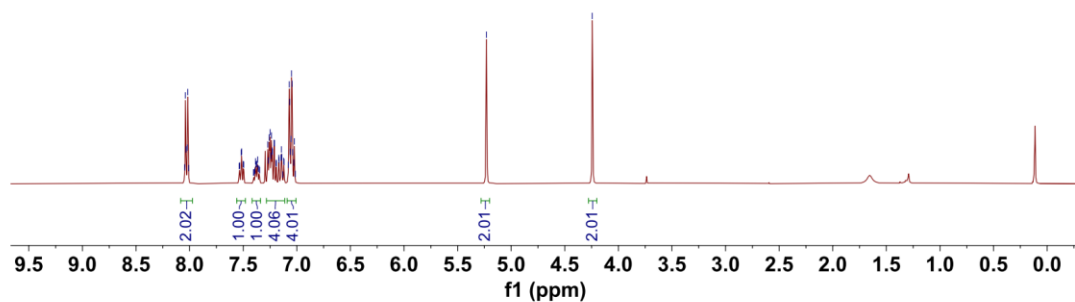

2.02  
1.00  
1.00  
4.06  
4.01  
2.01  
2.01

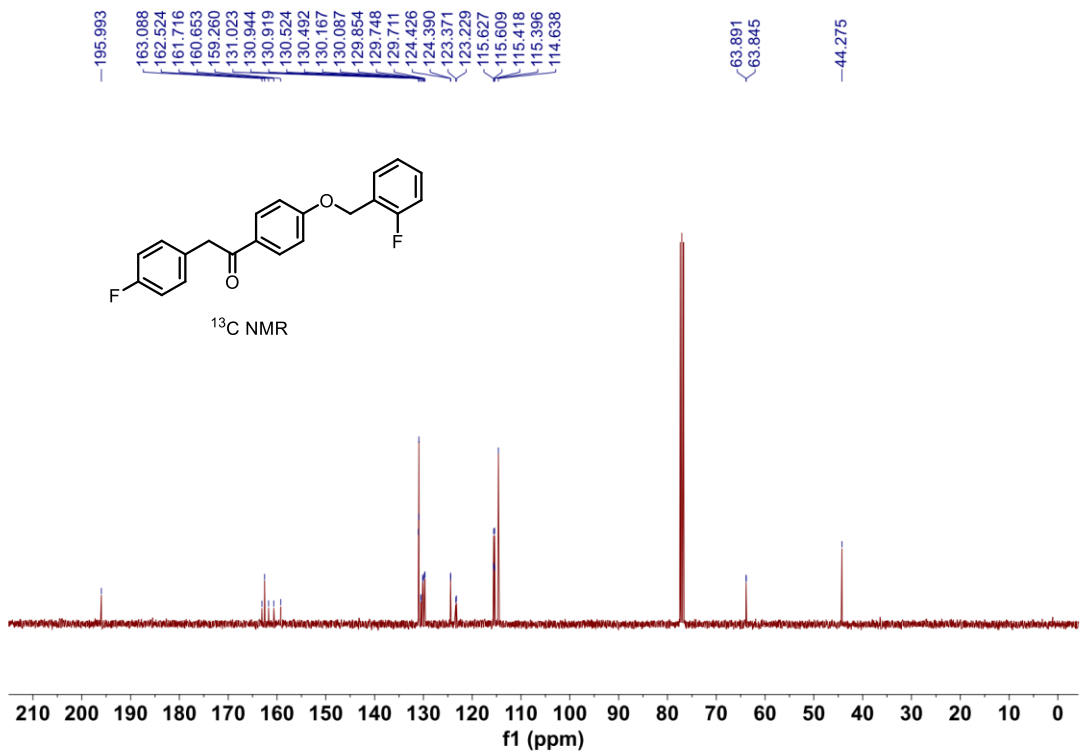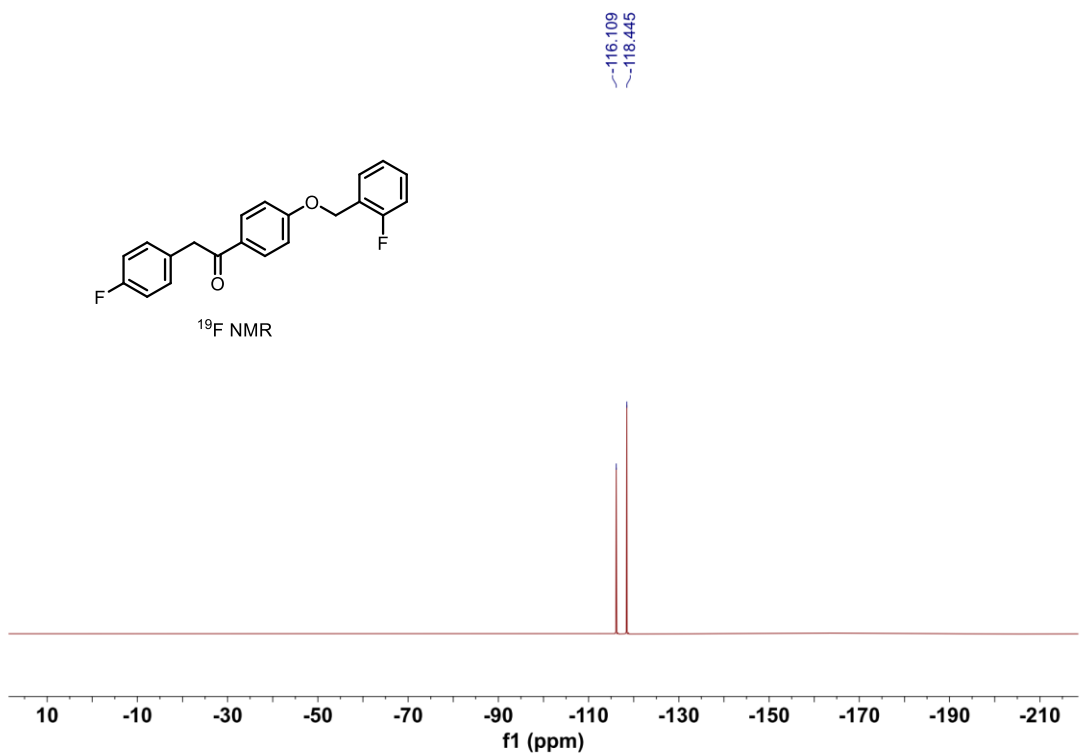

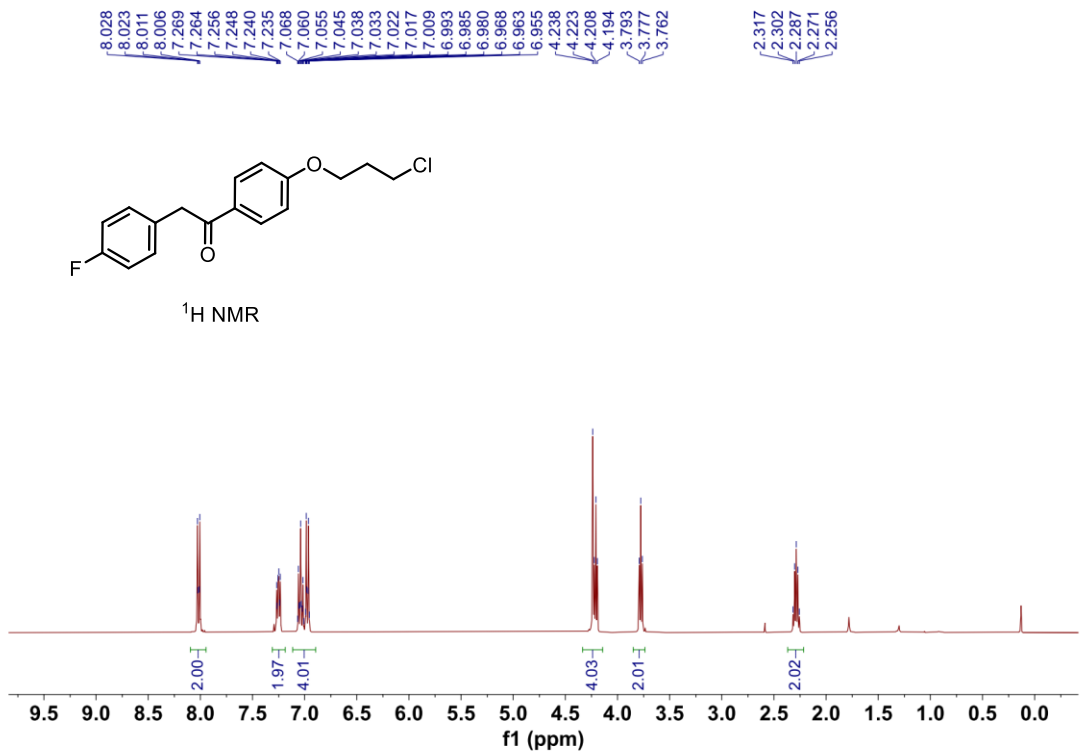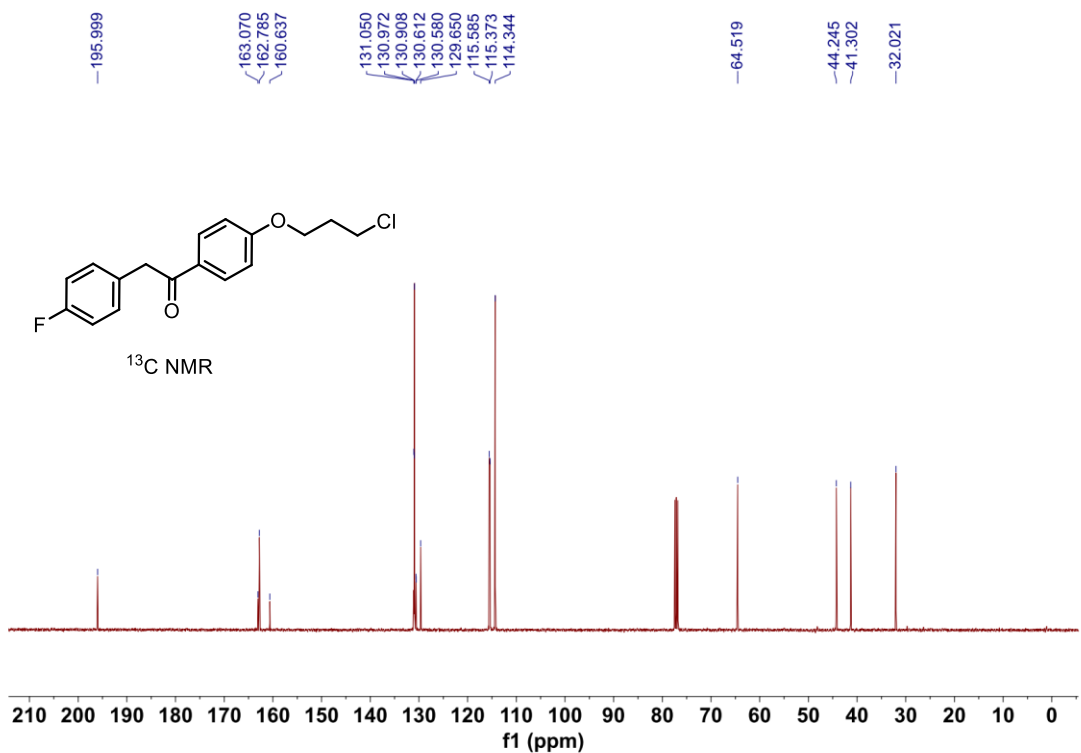

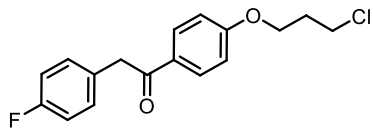

<sup>19</sup>F NMR

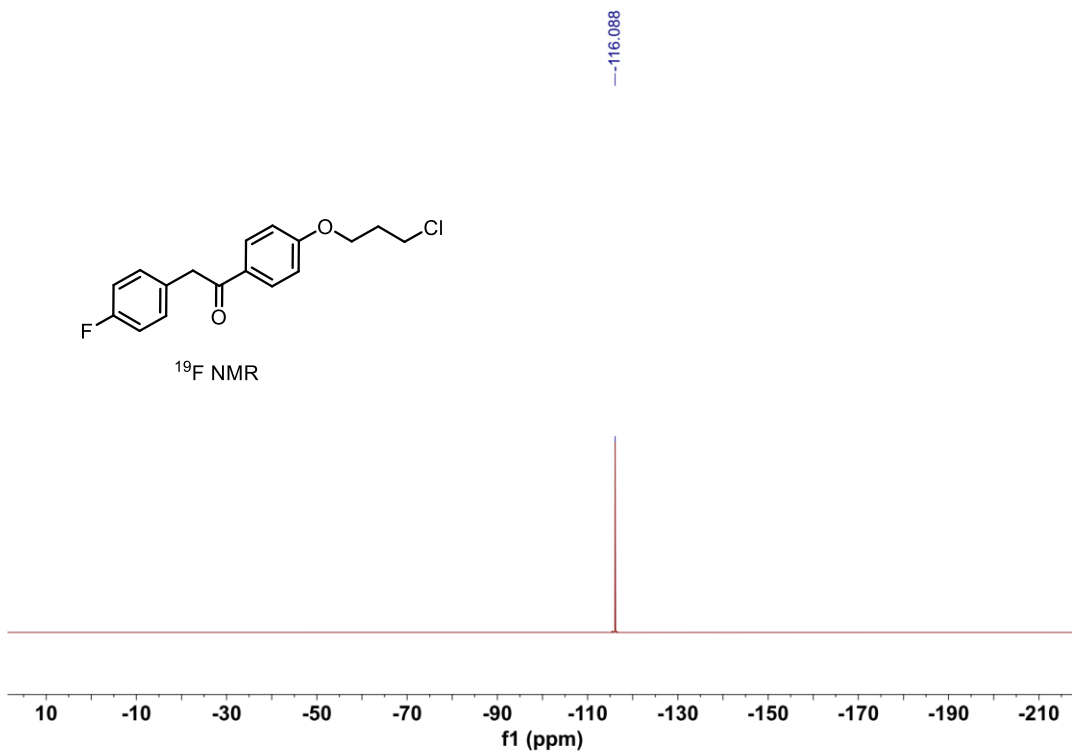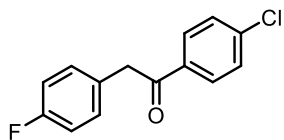

<sup>1</sup>H NMR

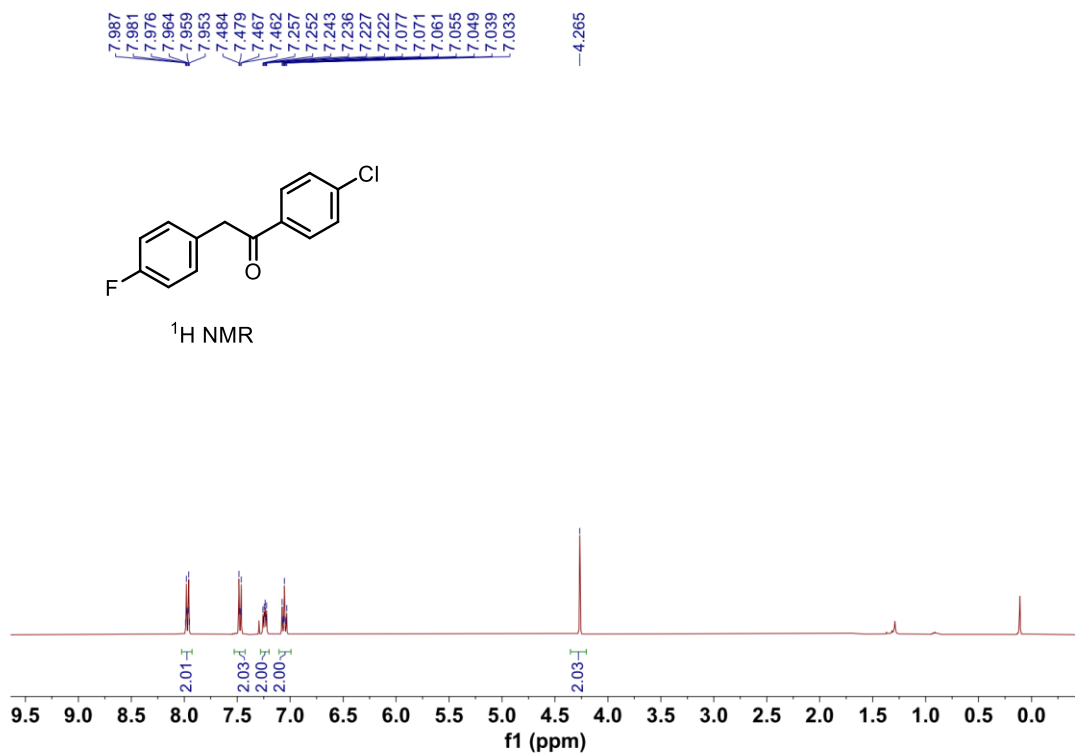

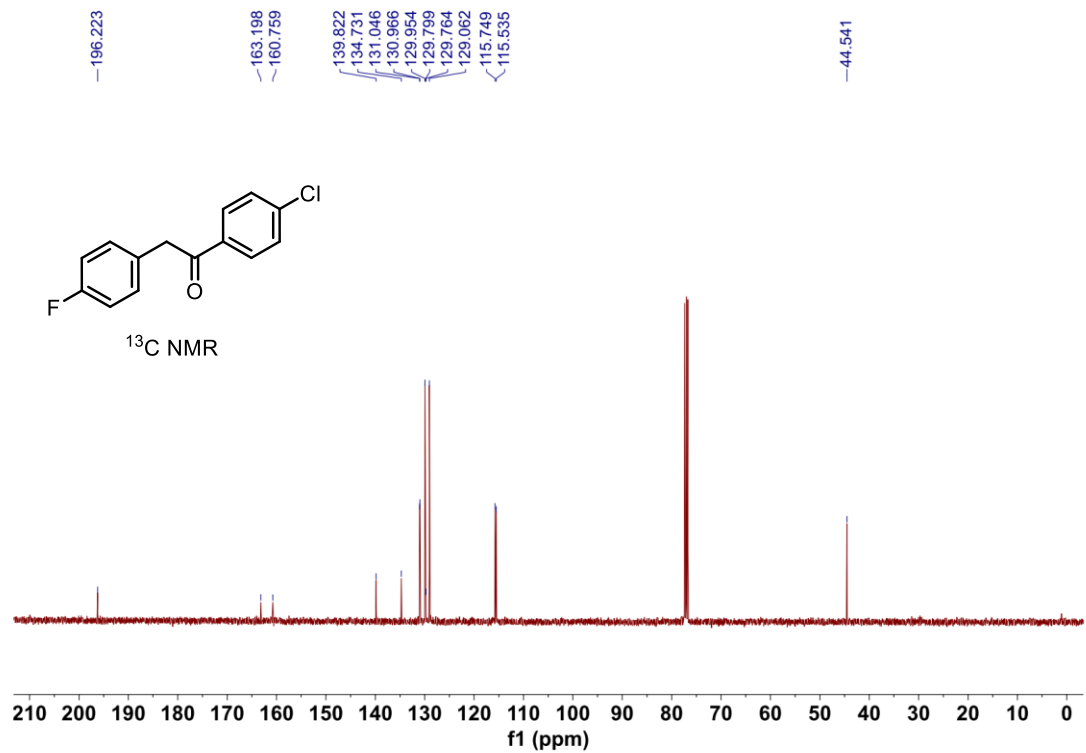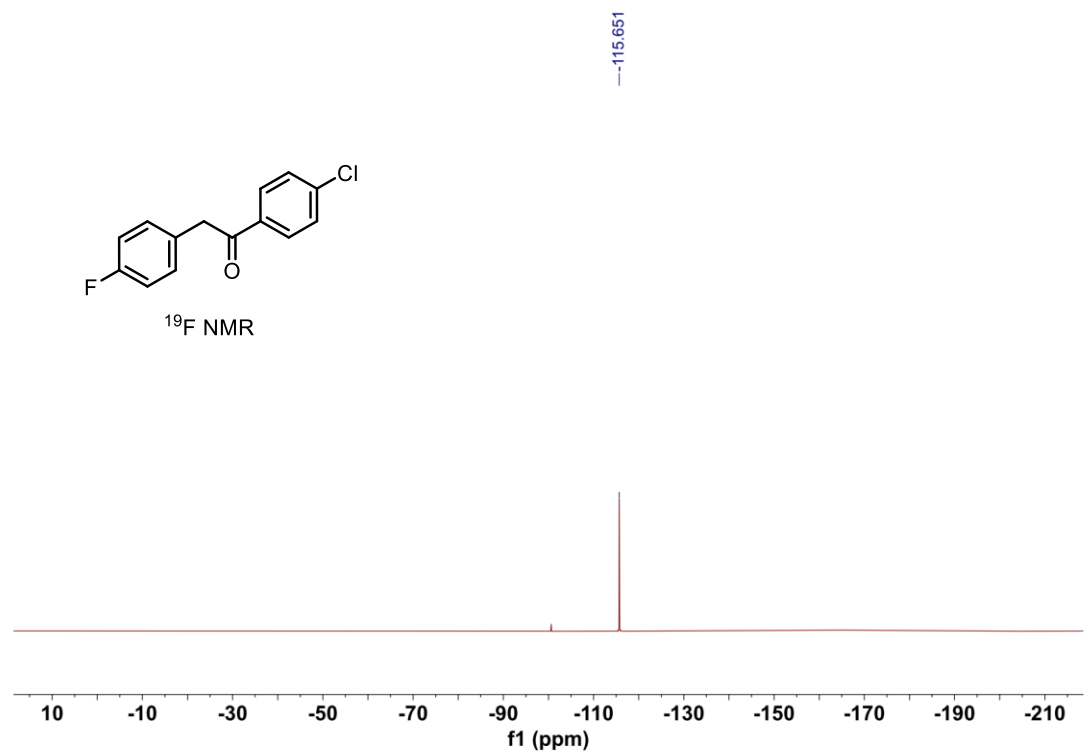



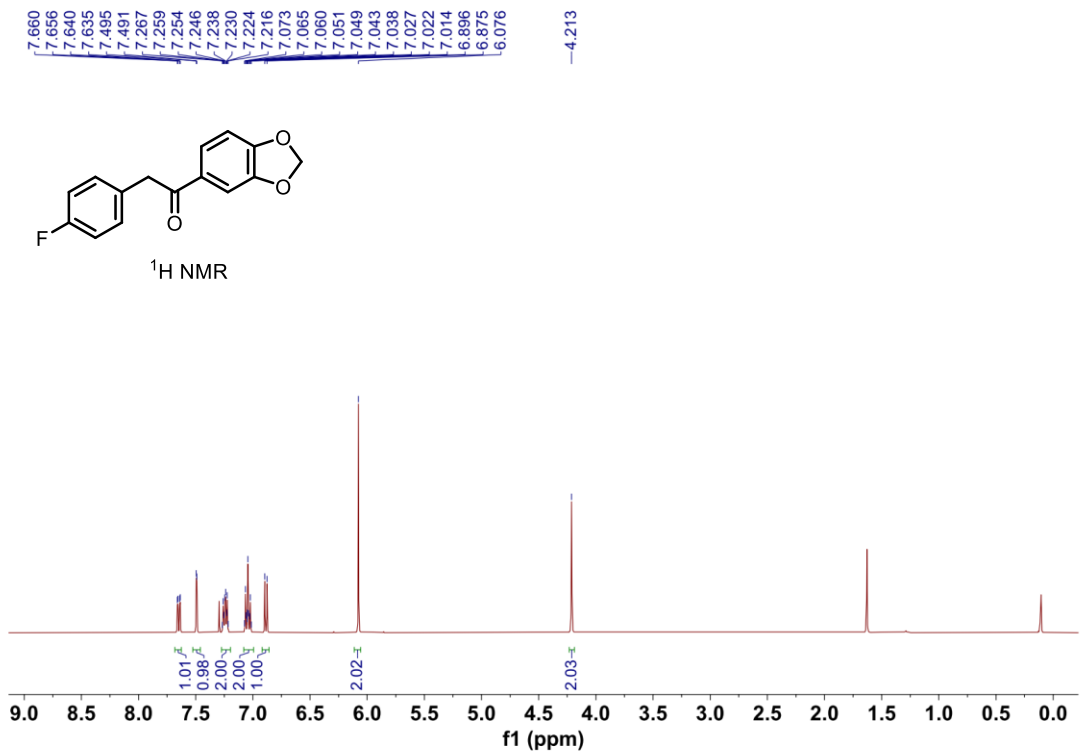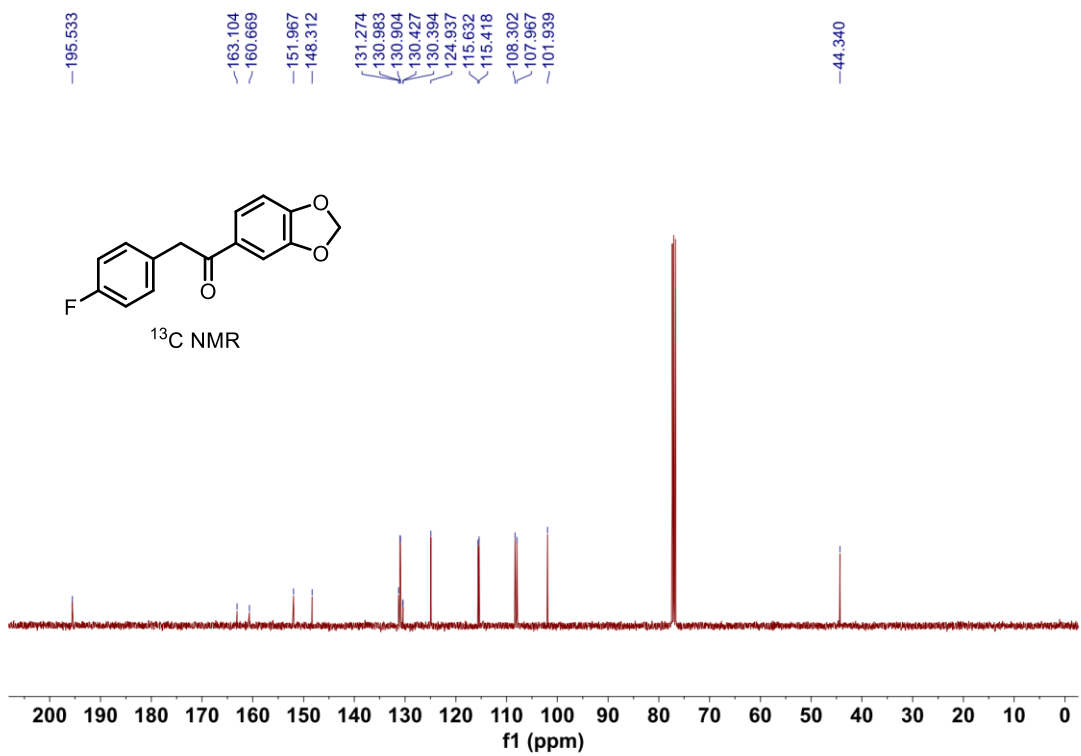

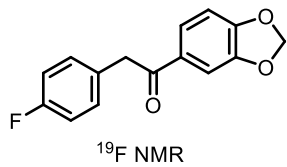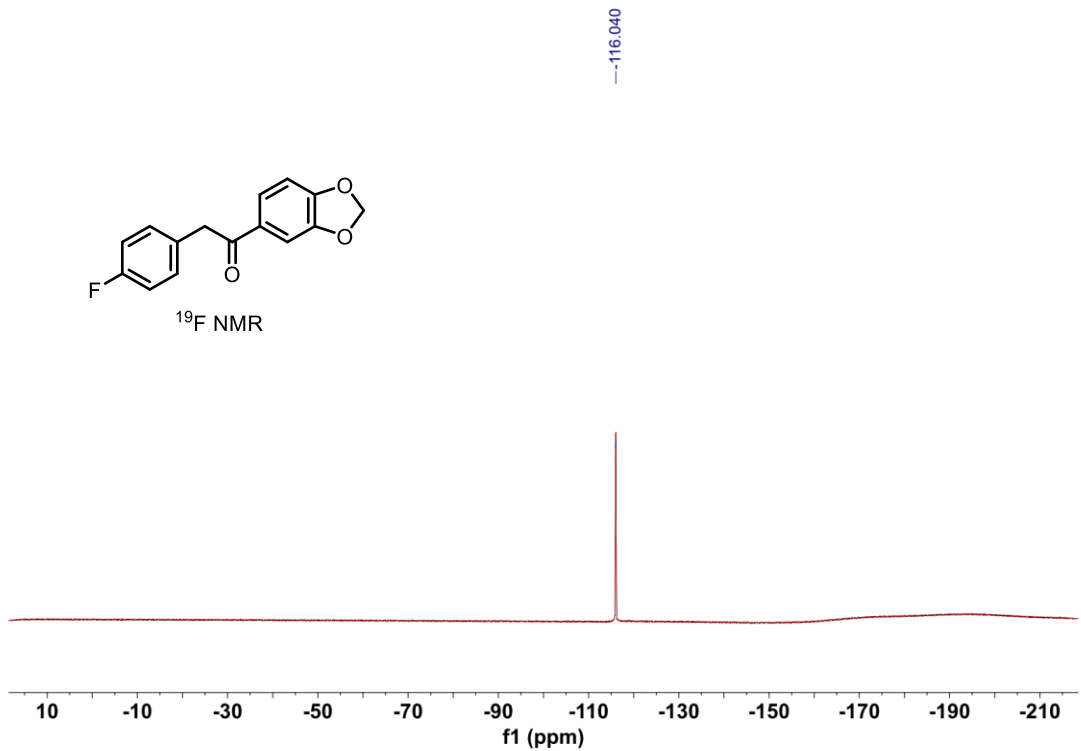

7.971  
 7.967  
 7.966  
 7.951  
 7.761  
 7.759  
 7.755  
 7.741  
 7.737  
 7.295  
 7.289  
 7.284  
 7.270  
 7.266  
 7.261  
 7.258  
 7.253  
 7.245  
 7.240  
 7.231  
 7.224  
 7.218  
 7.205  
 7.201  
 7.190  
 7.184  
 7.089  
 7.081  
 7.075  
 7.065  
 7.059  
 7.053  
 7.043  
 7.037  
 7.029  
 6.667  
 6.659  
 5.403  
 4.235

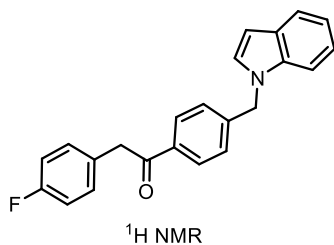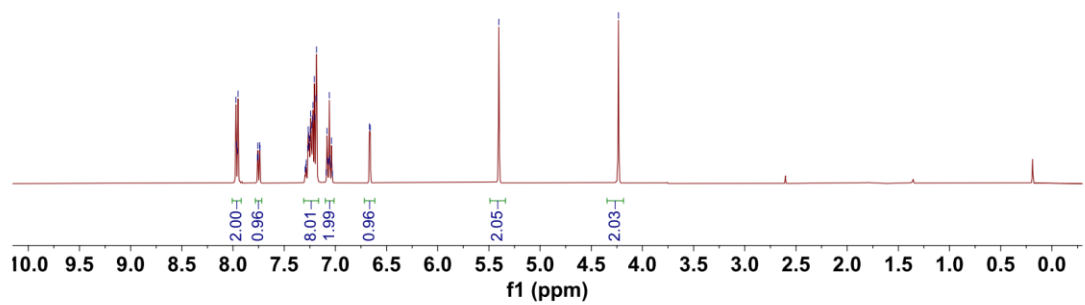

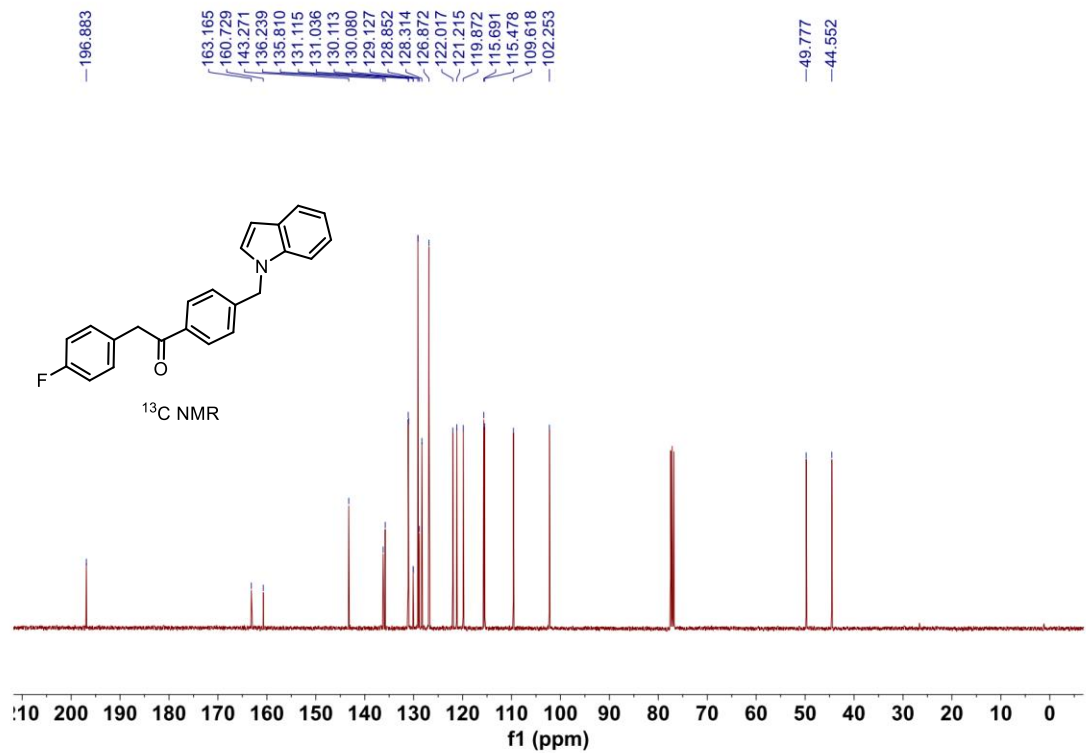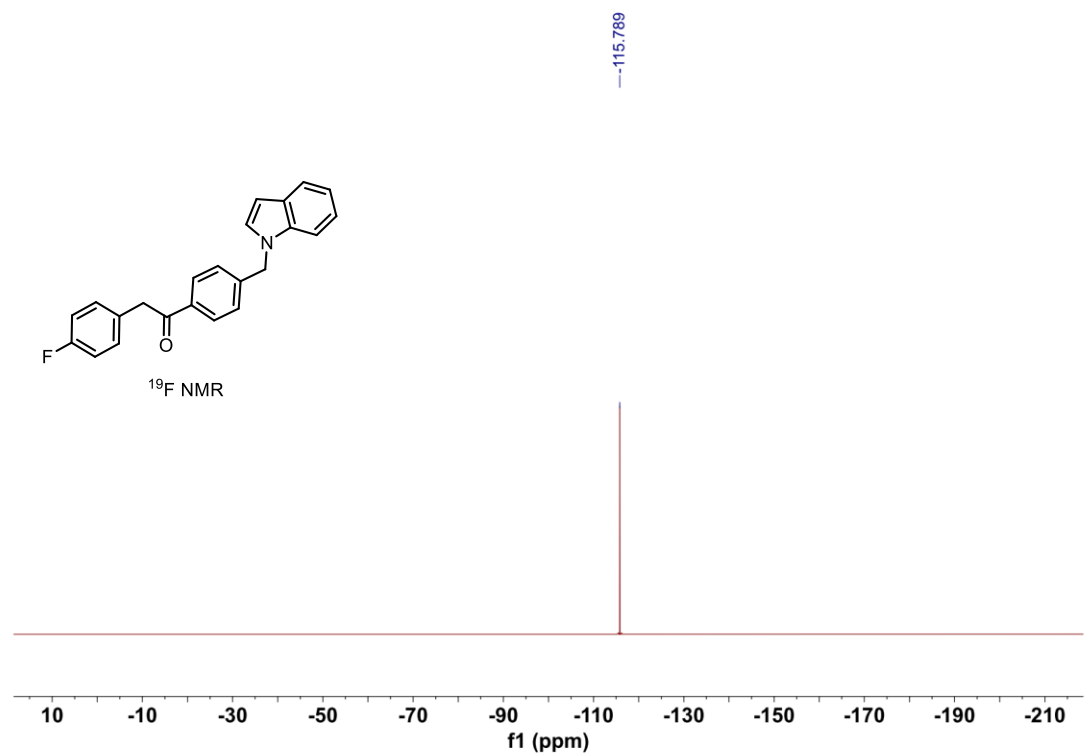

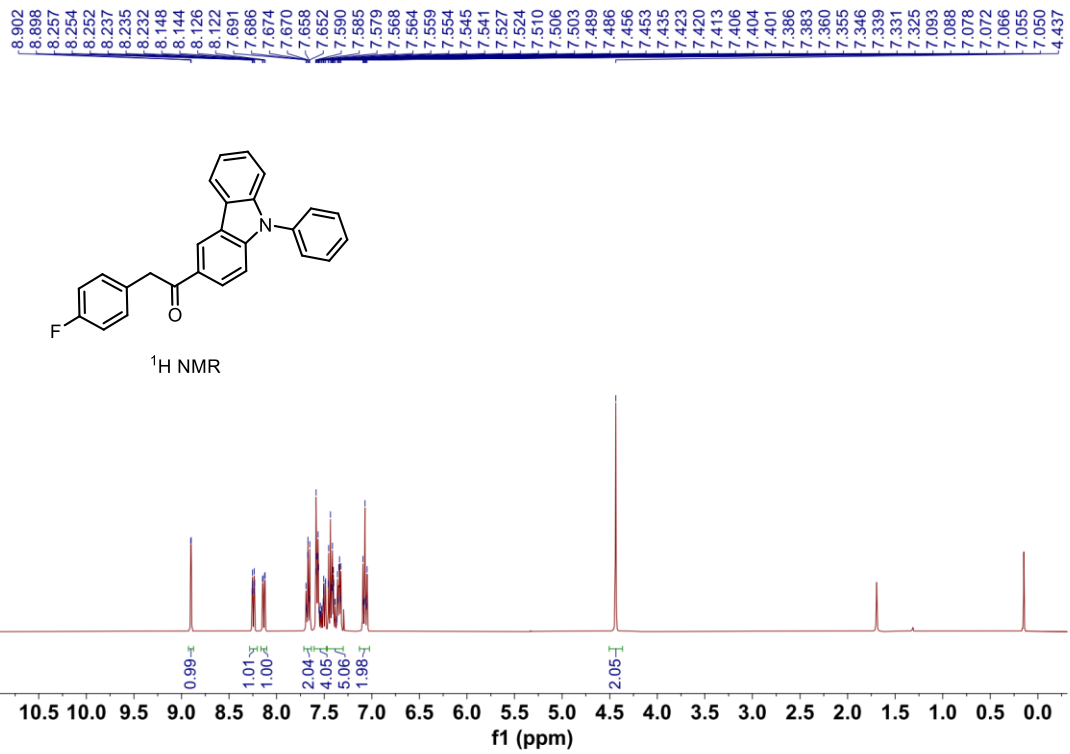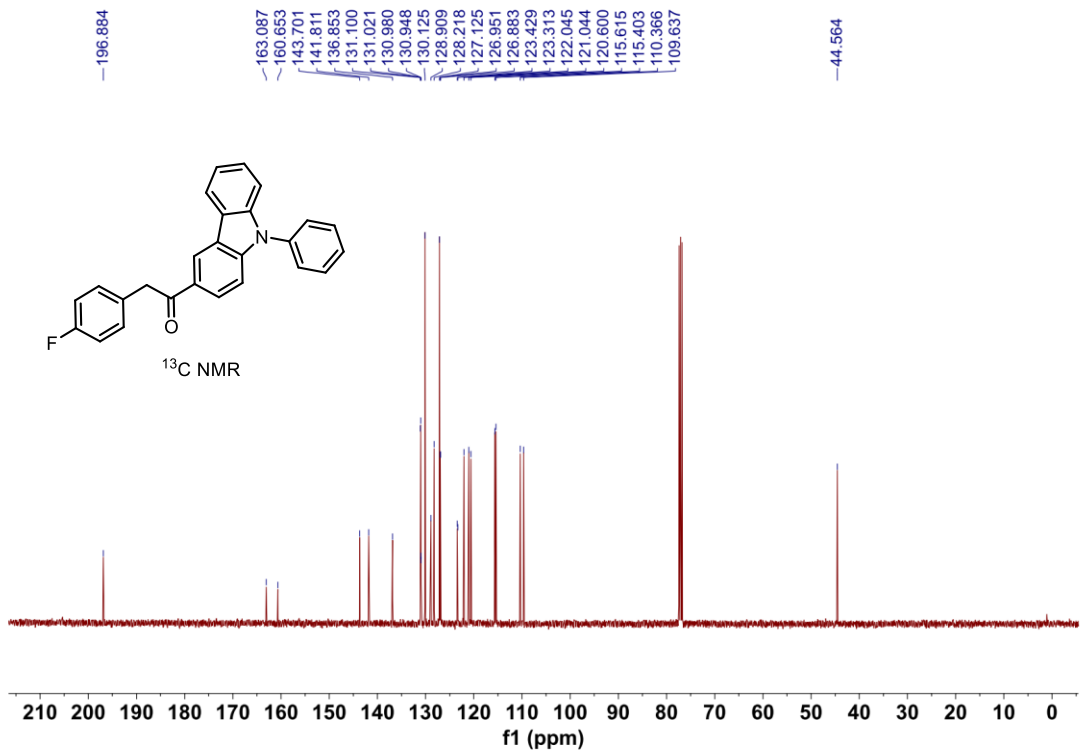

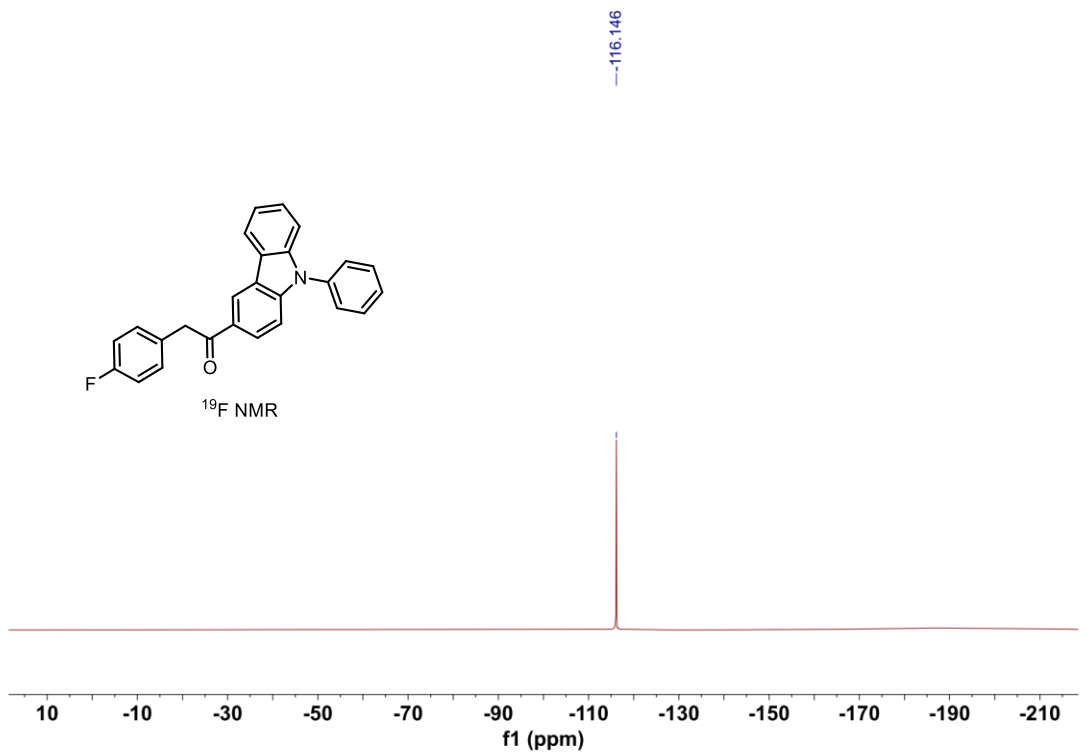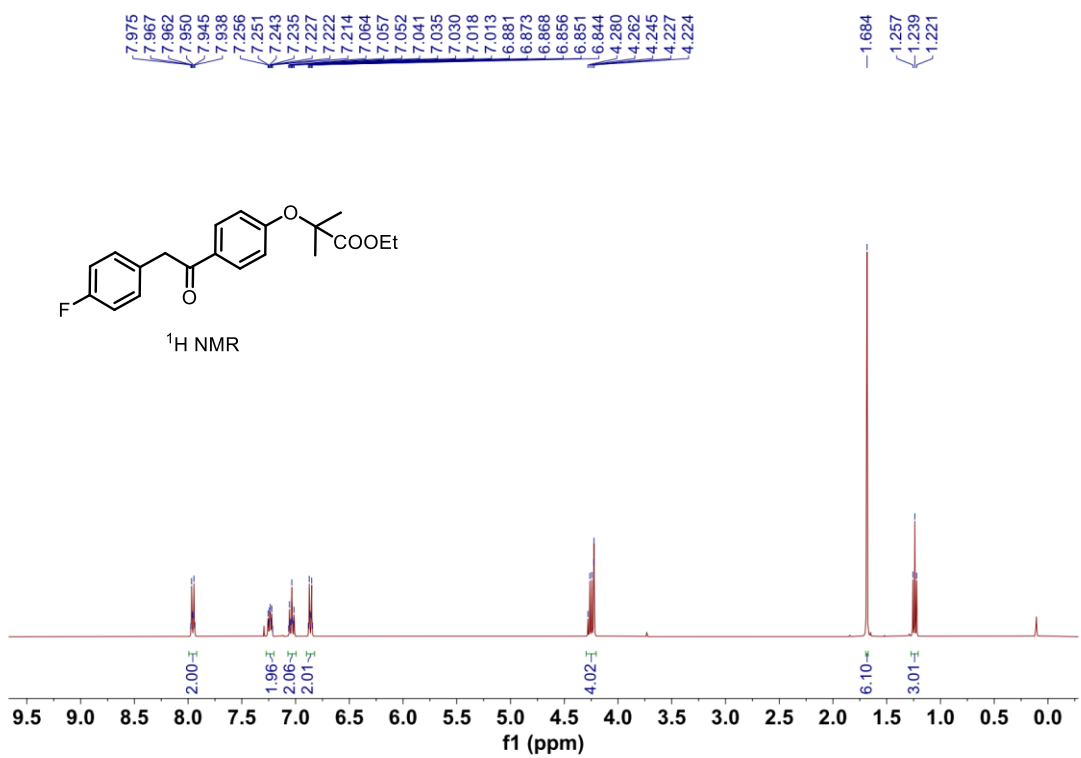

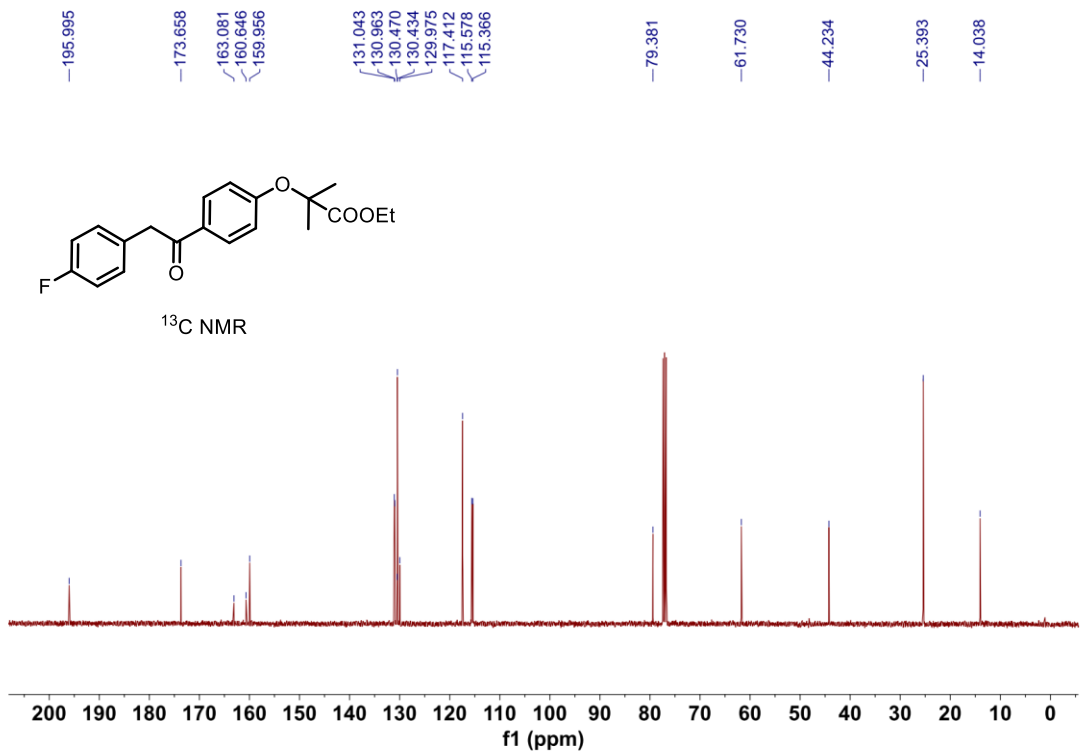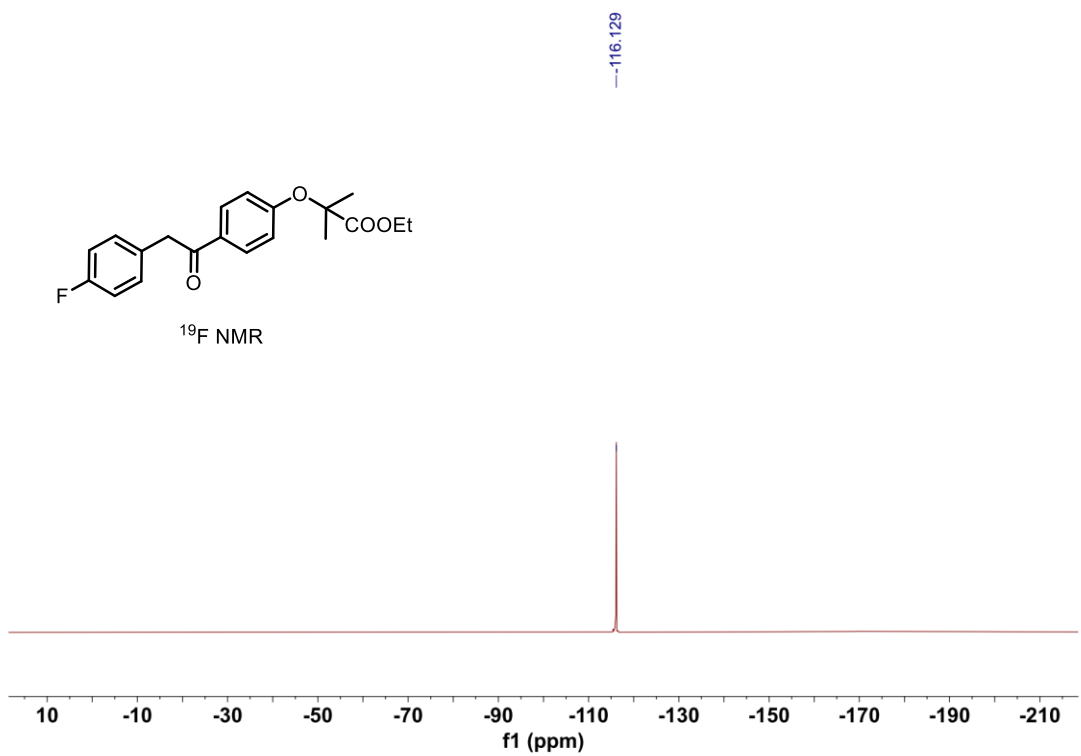

7.982  
7.977  
7.973  
7.961  
7.956  
7.951  
7.576  
7.572  
7.560  
7.556  
7.448  
7.434  
7.242  
7.237  
7.229  
7.221  
7.213  
7.207  
7.049  
7.043  
7.033  
7.027  
7.021  
7.011  
7.005  
6.011  
6.007  
6.003  
5.999  
5.995  
5.991  
5.987  
5.984  
5.228  
5.193  
5.154  
5.118  
4.249  
4.238  
4.229  
4.218  
4.023  
4.017  
4.001  
3.997  
2.440  
2.417  
2.401  
2.094  
2.091  
2.082  
2.078  
2.071  
2.069  
2.064  
2.057  
2.053  
2.046  
1.947

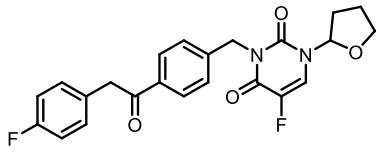

<sup>1</sup>H NMR

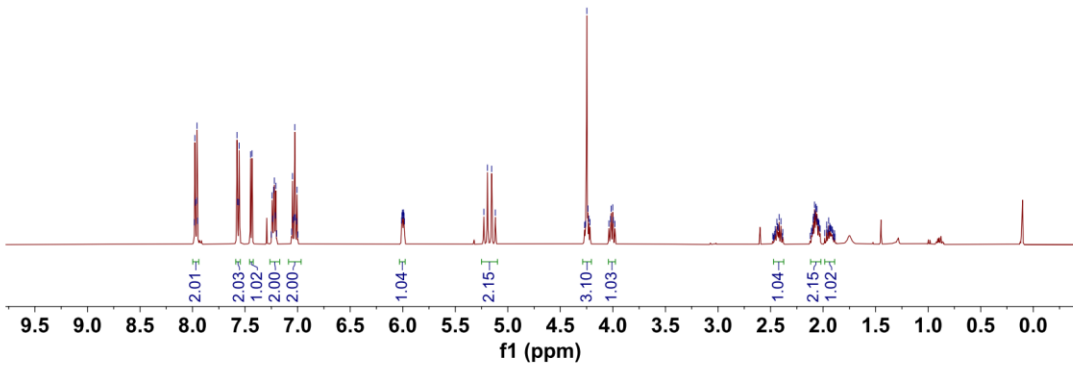

196.955  
163.112  
160.675  
157.194  
156.940  
148.997  
141.459  
141.109  
138.777  
135.908  
131.069  
130.990  
130.095  
130.062  
129.321  
128.825  
122.217  
121.880  
115.636  
115.424  
88.180  
70.384  
44.552  
44.388  
33.047  
23.760

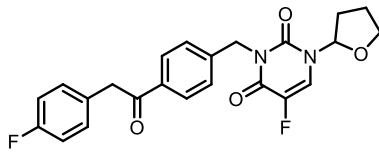

<sup>13</sup>C NMR

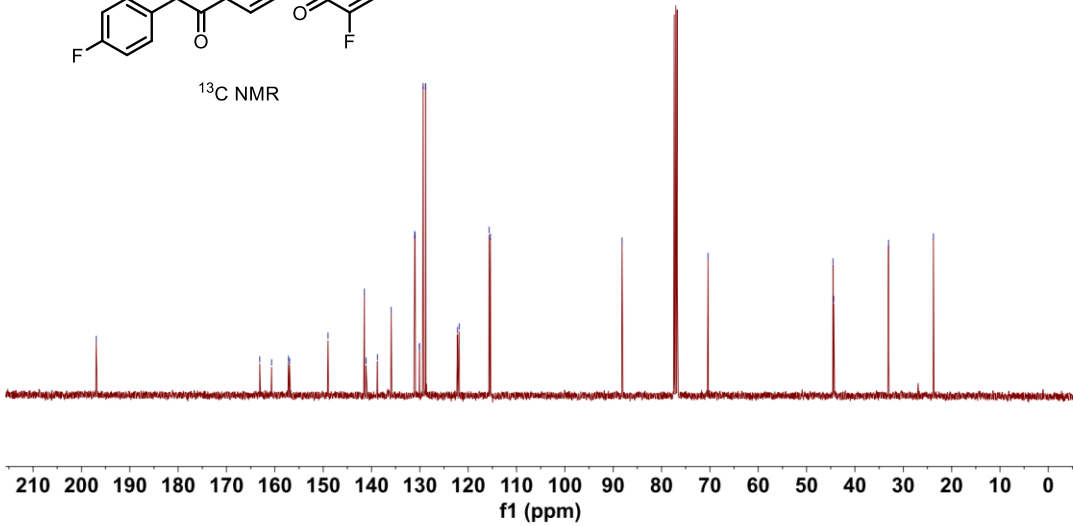

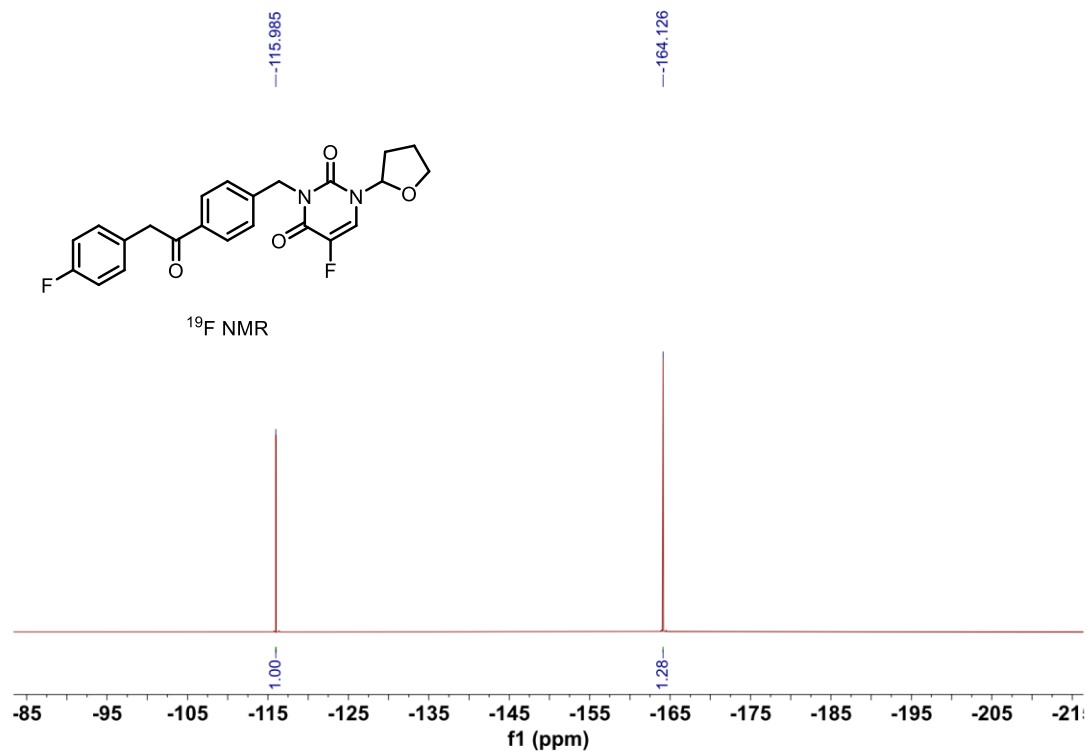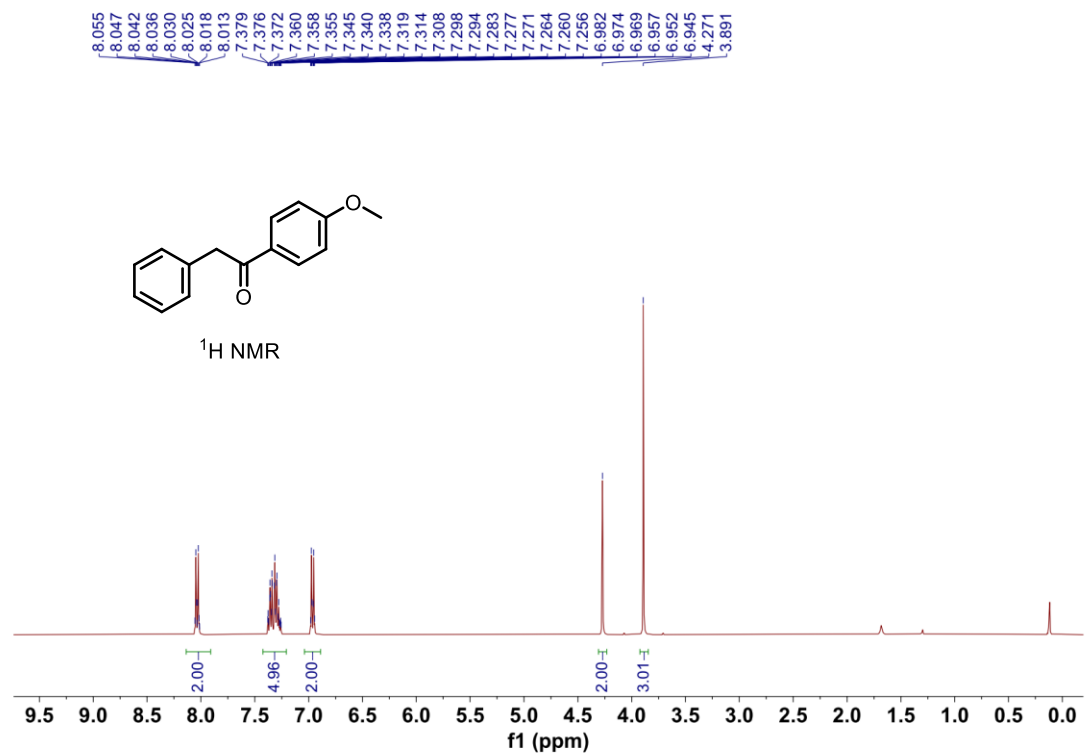



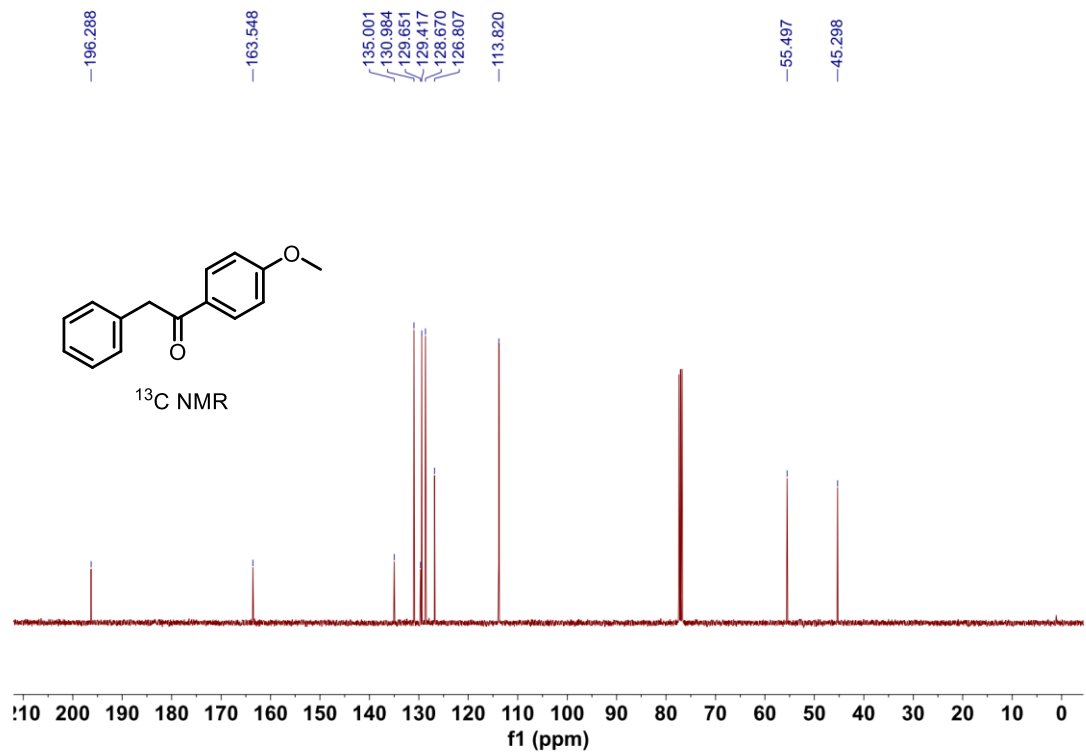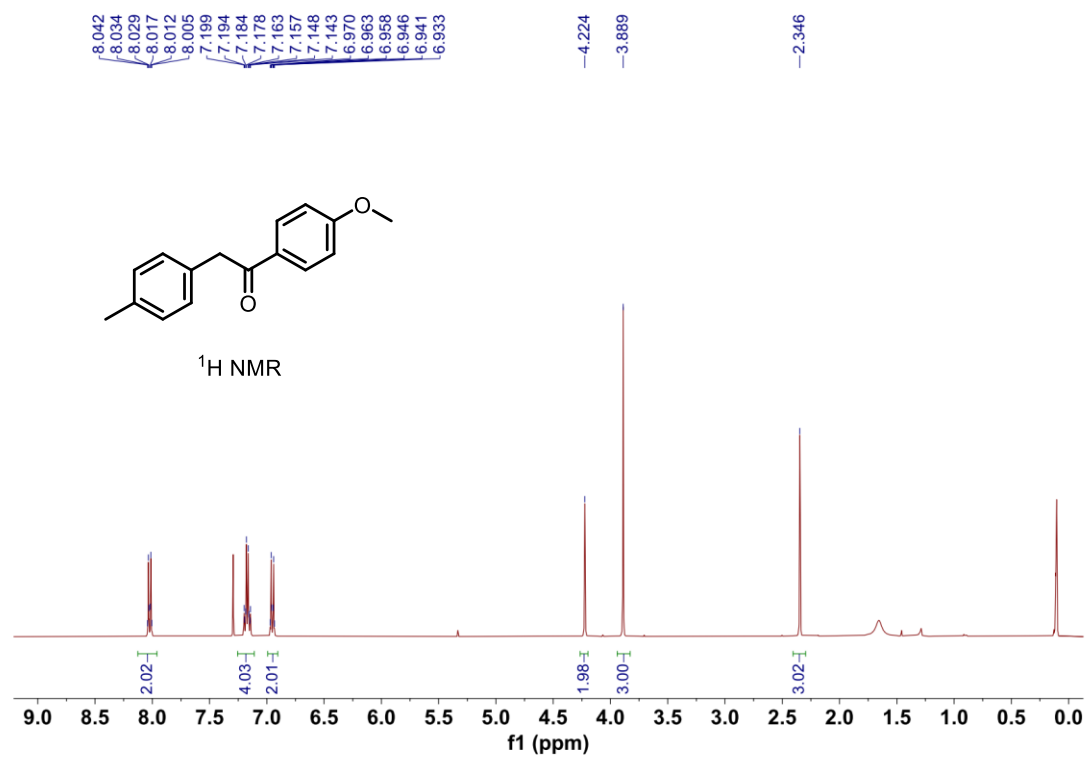

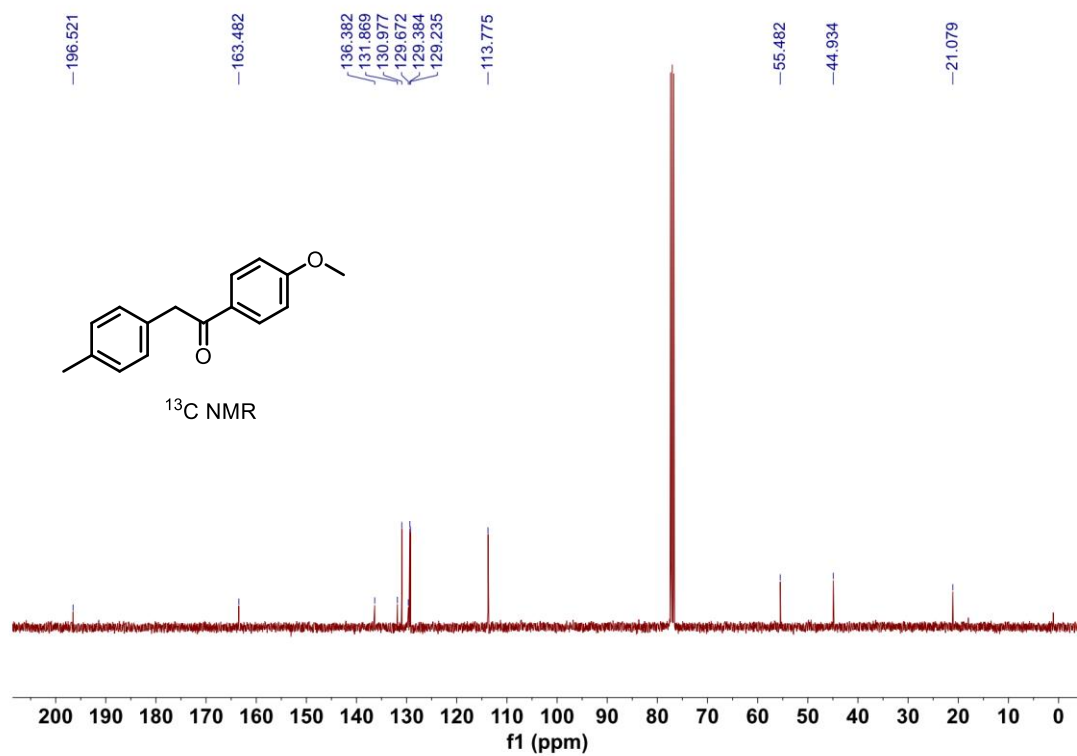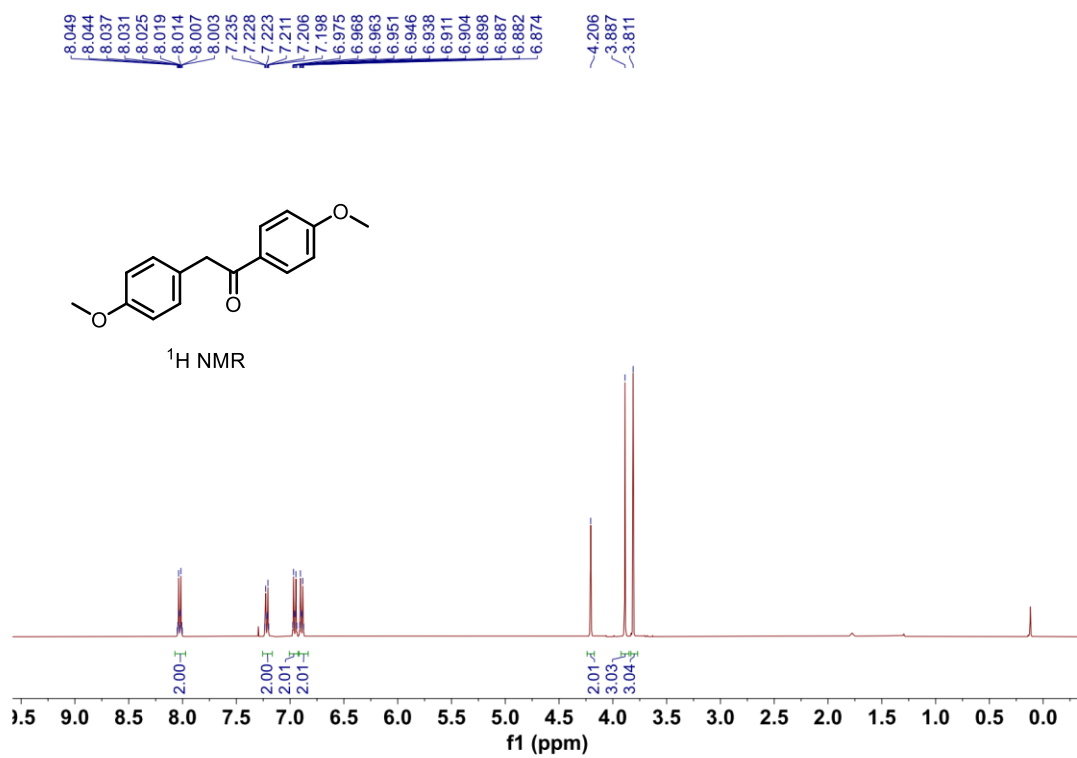

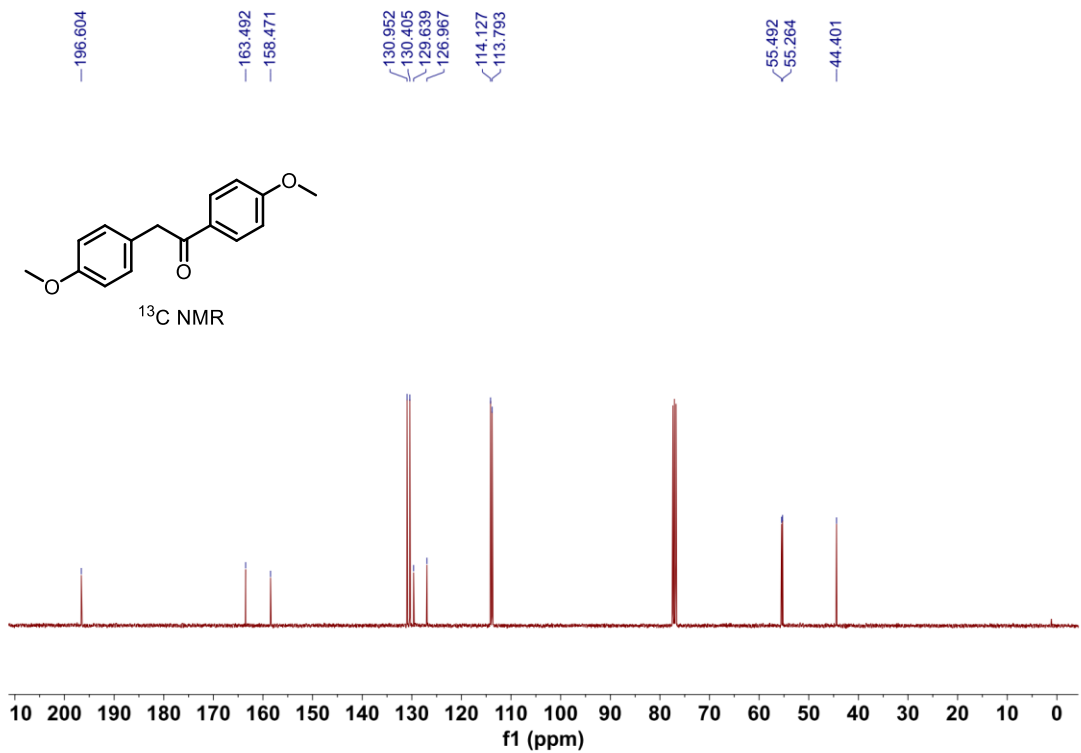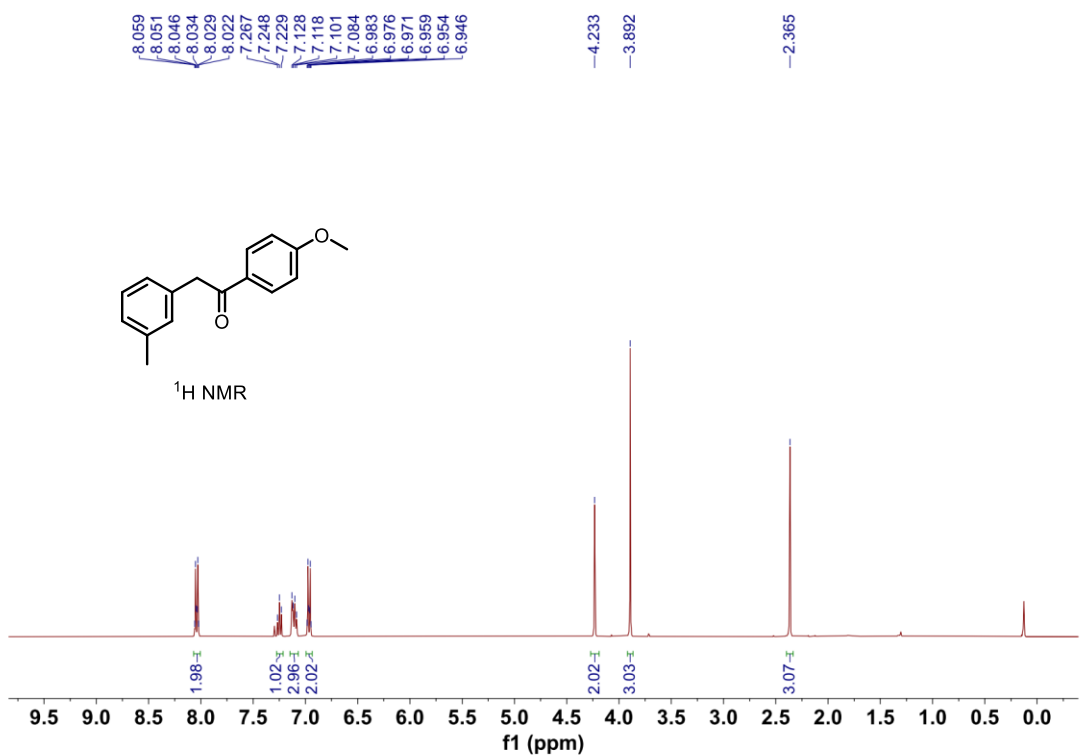

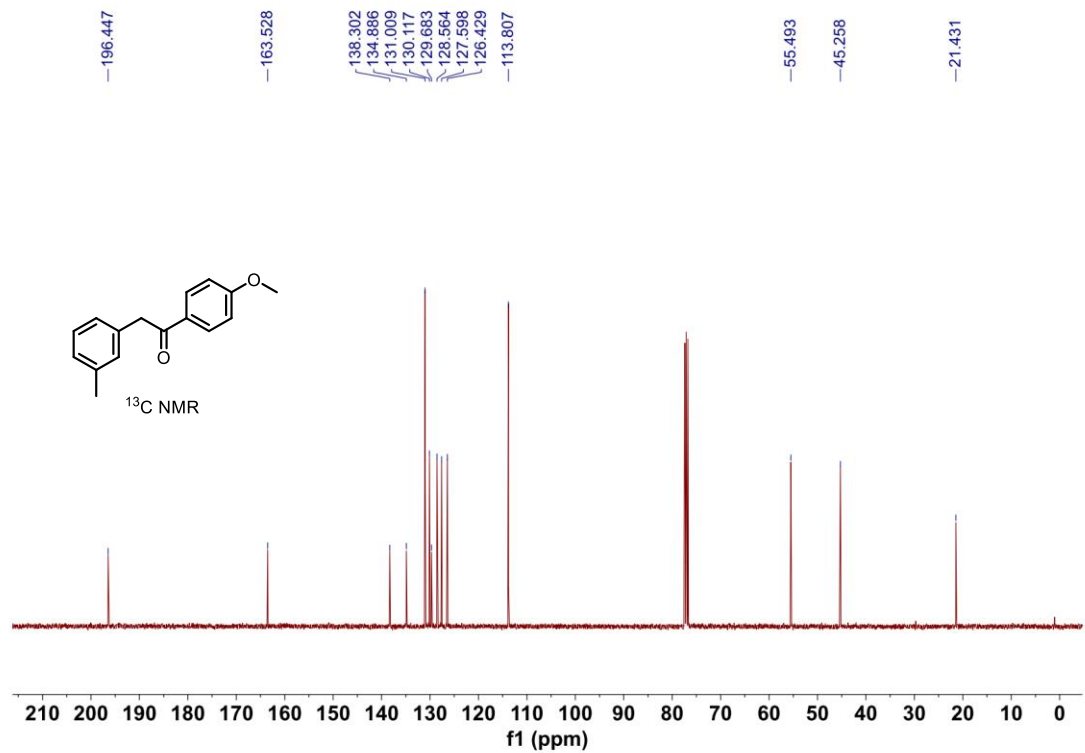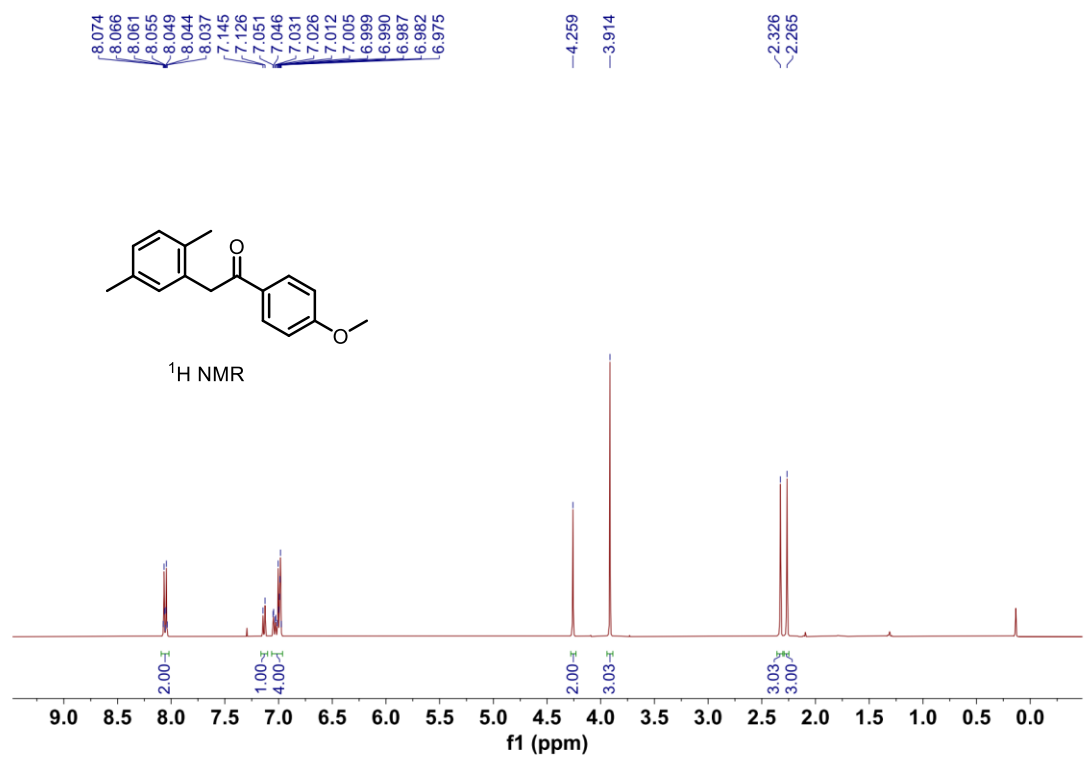

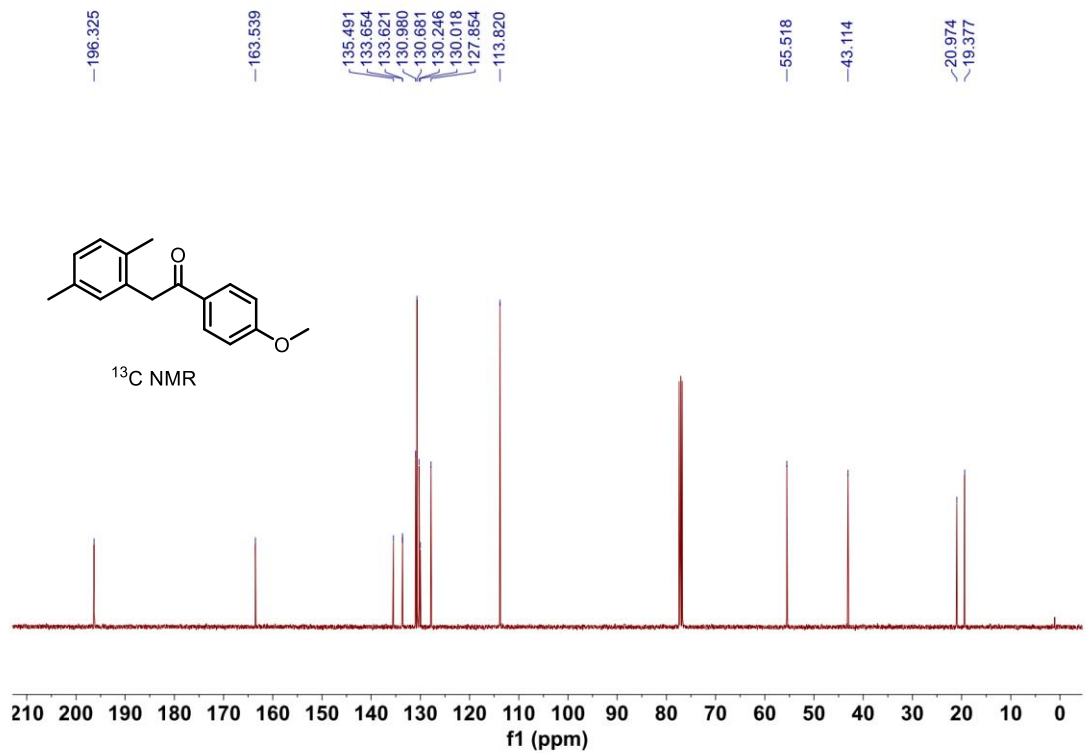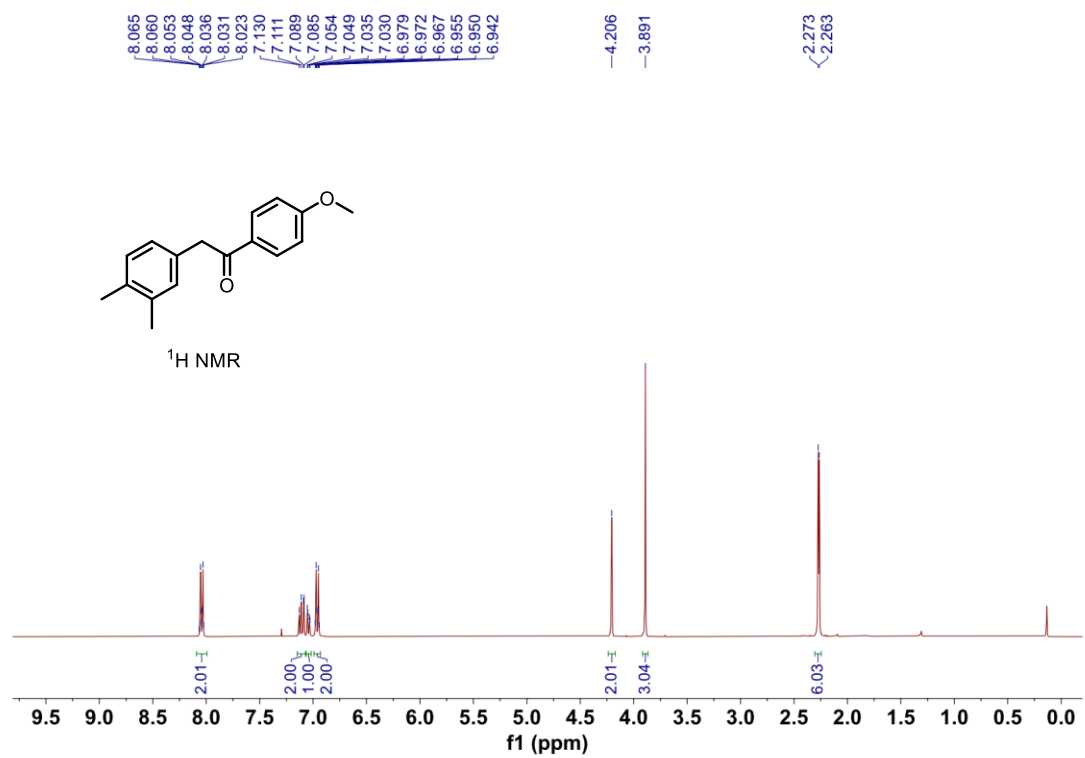

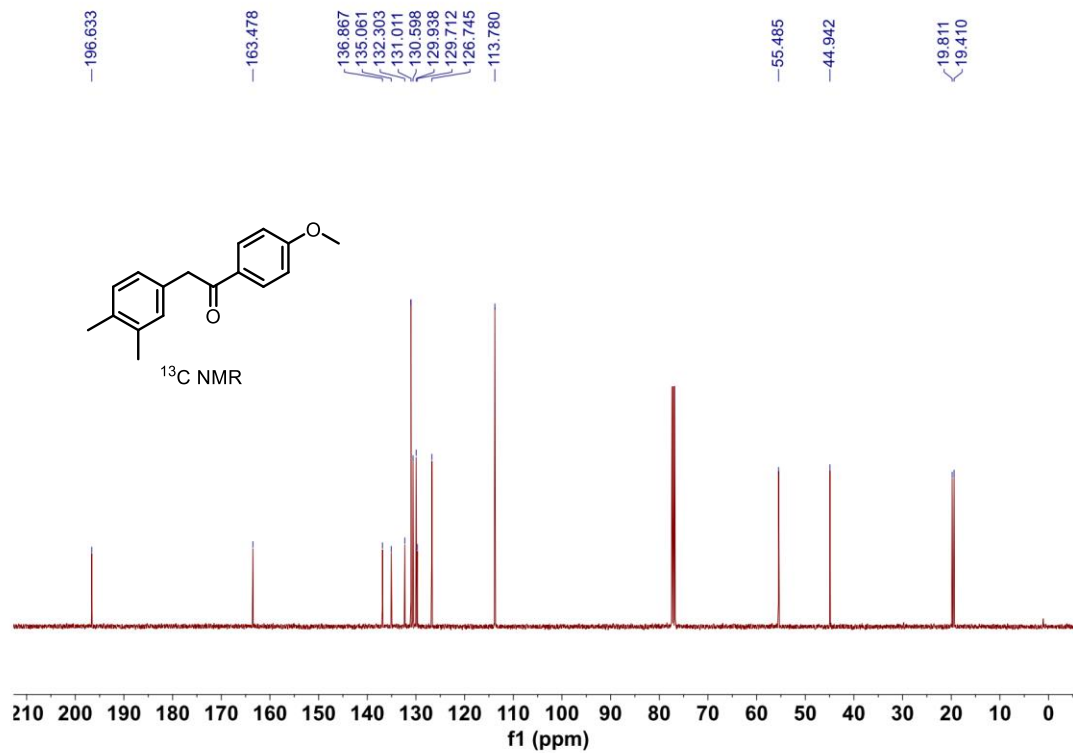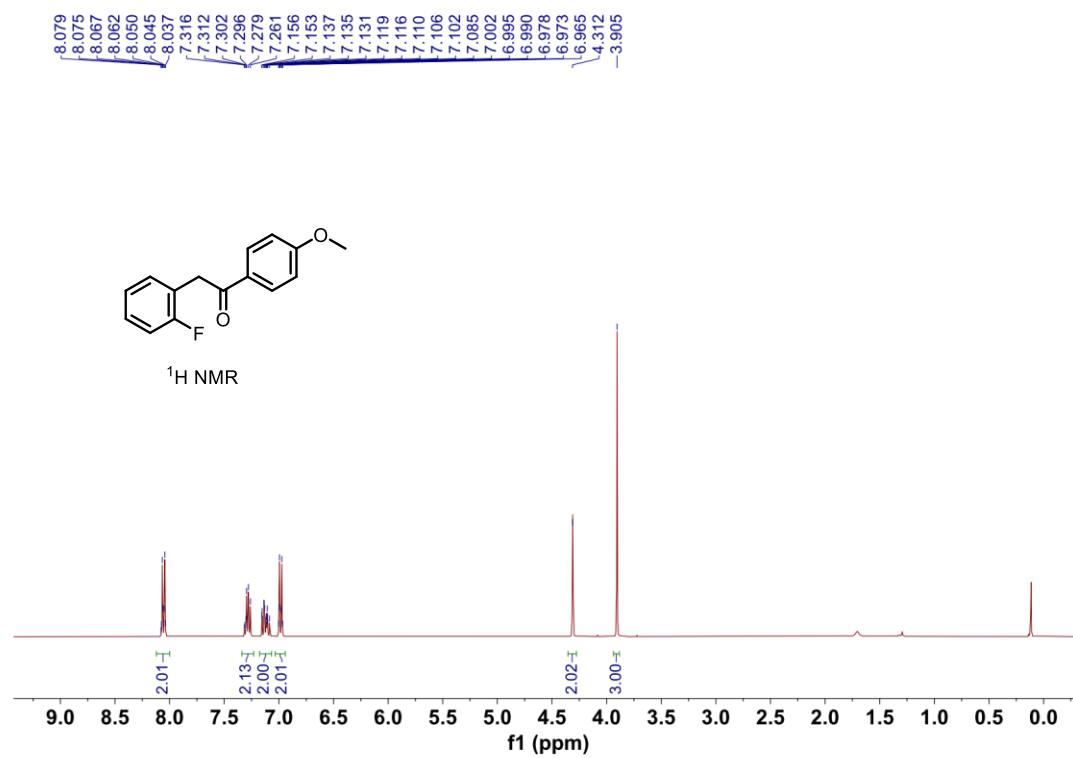

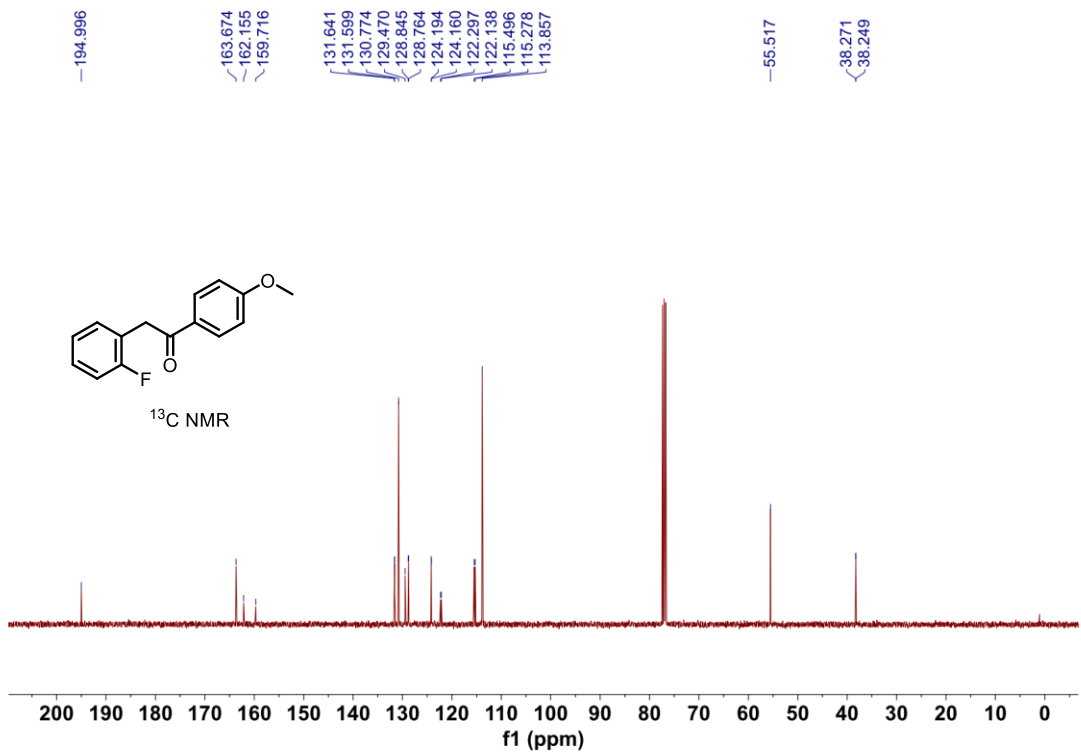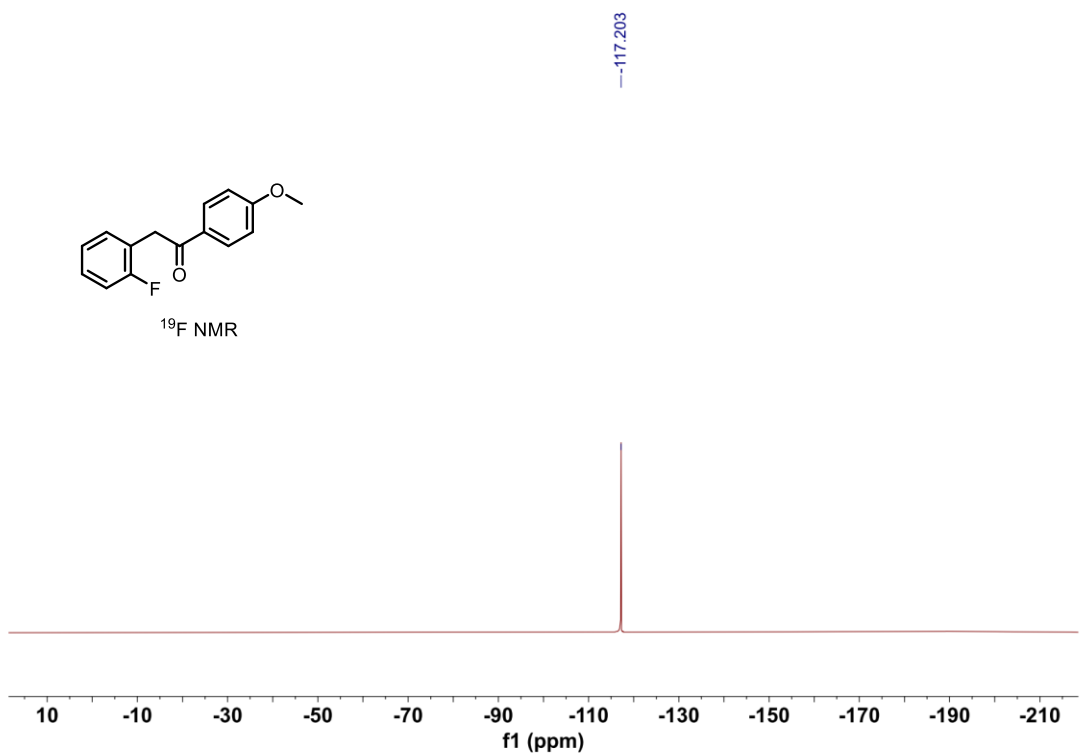

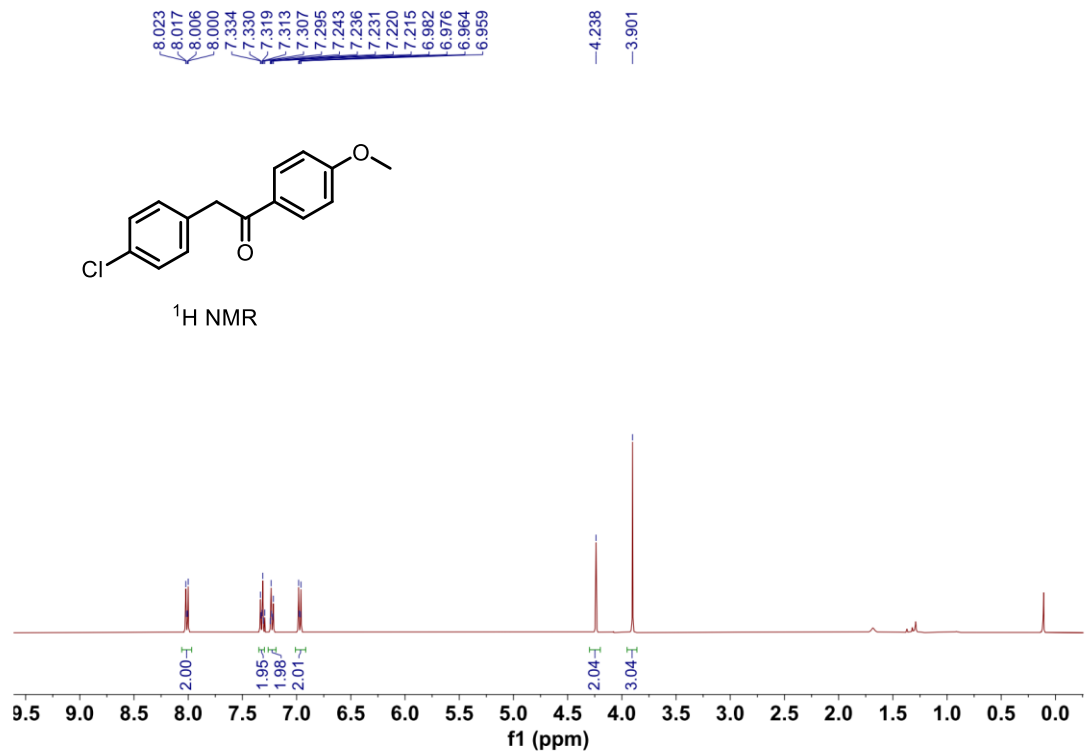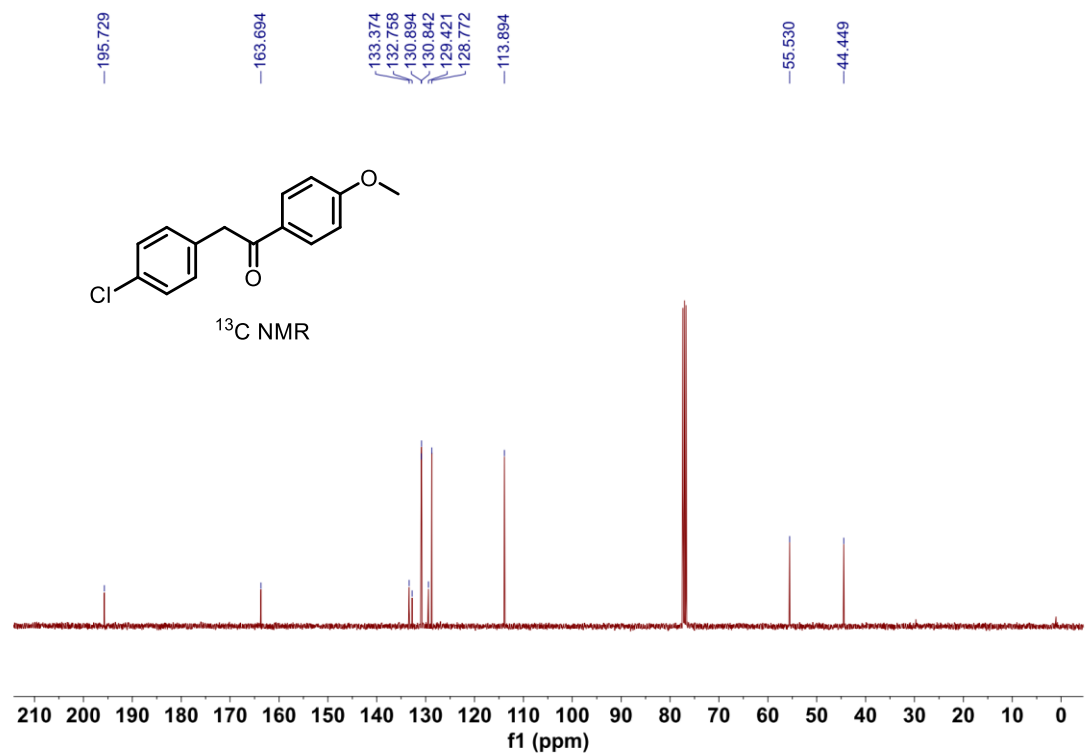



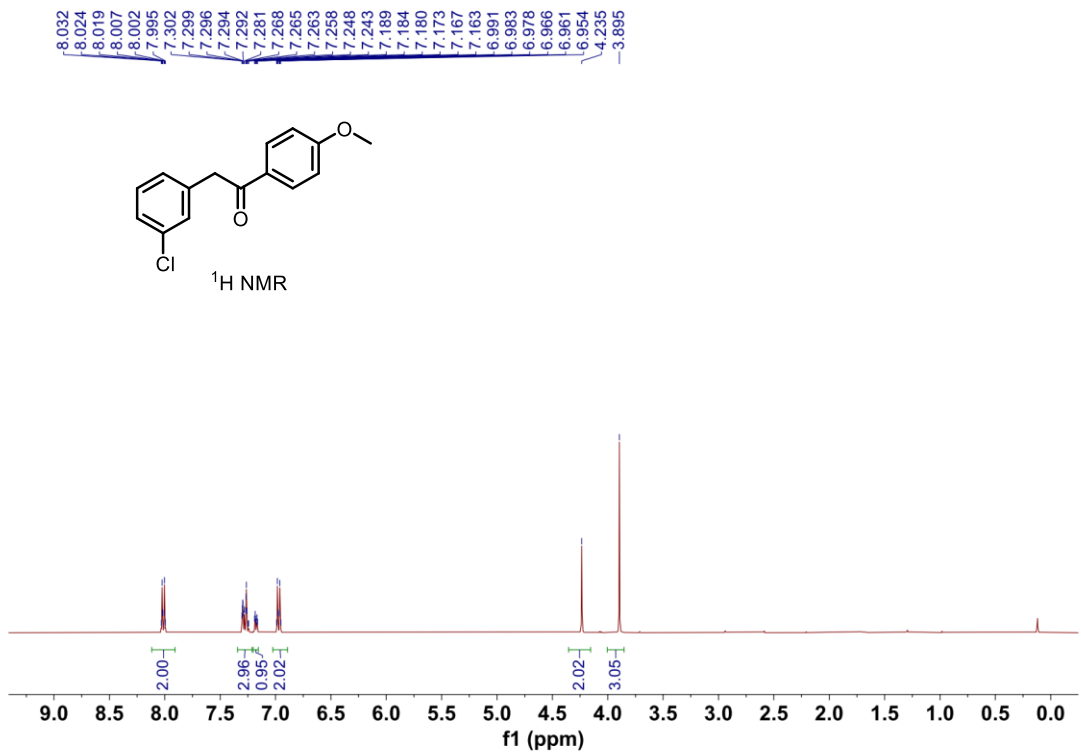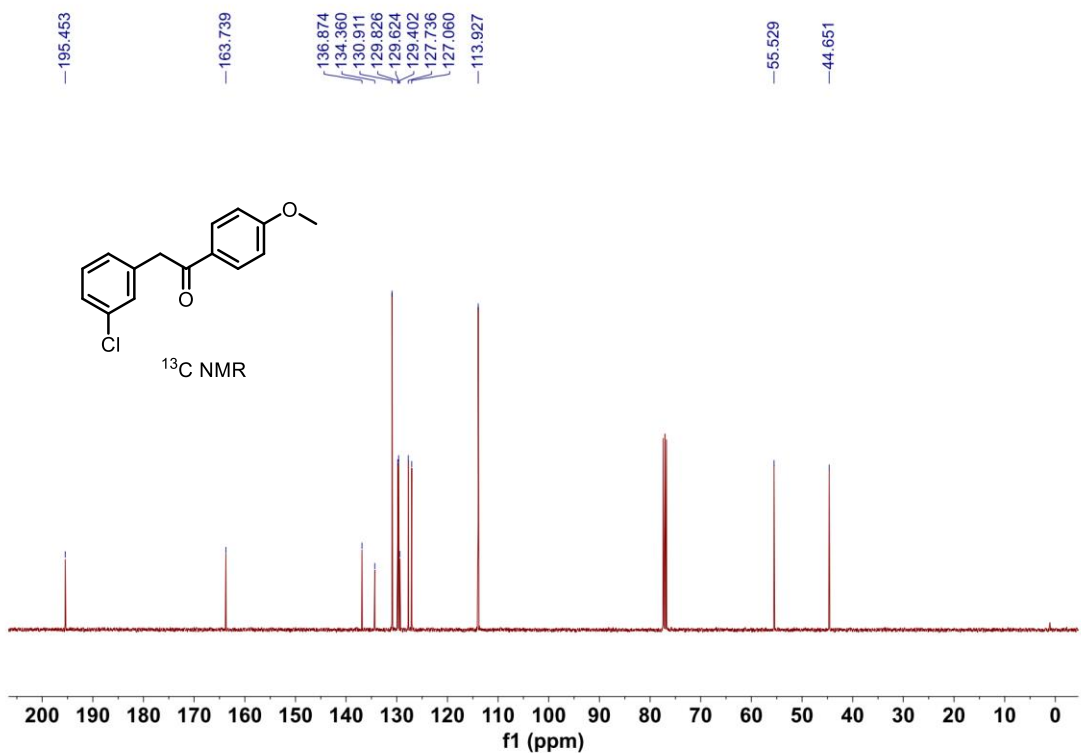

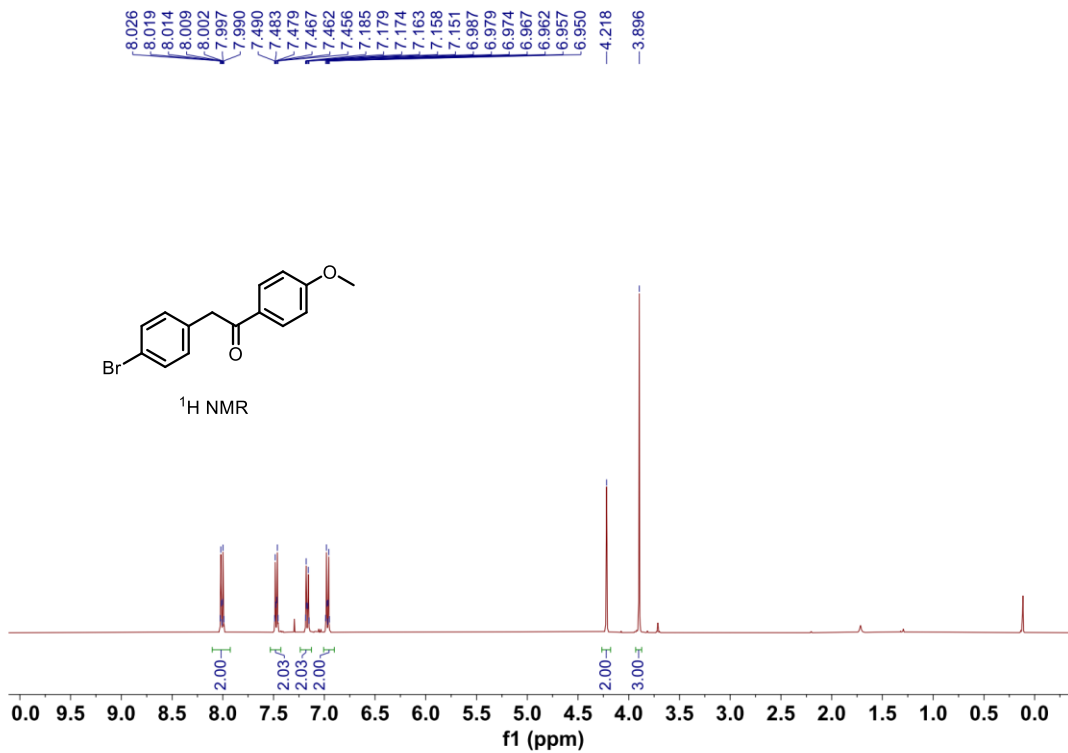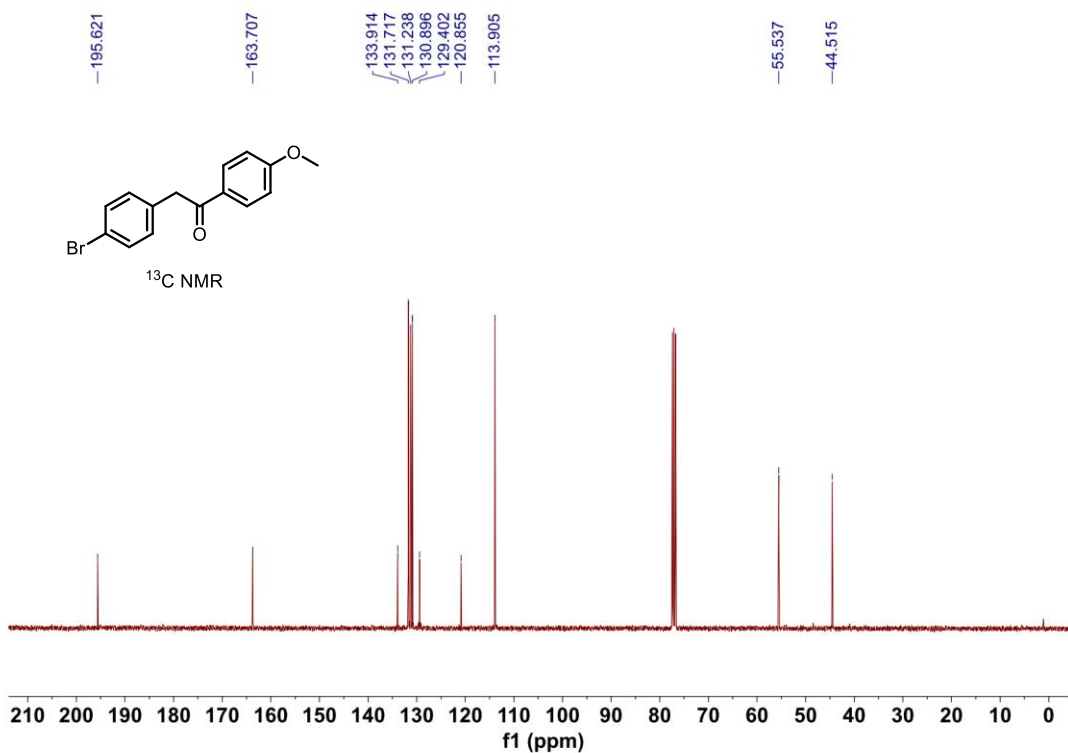

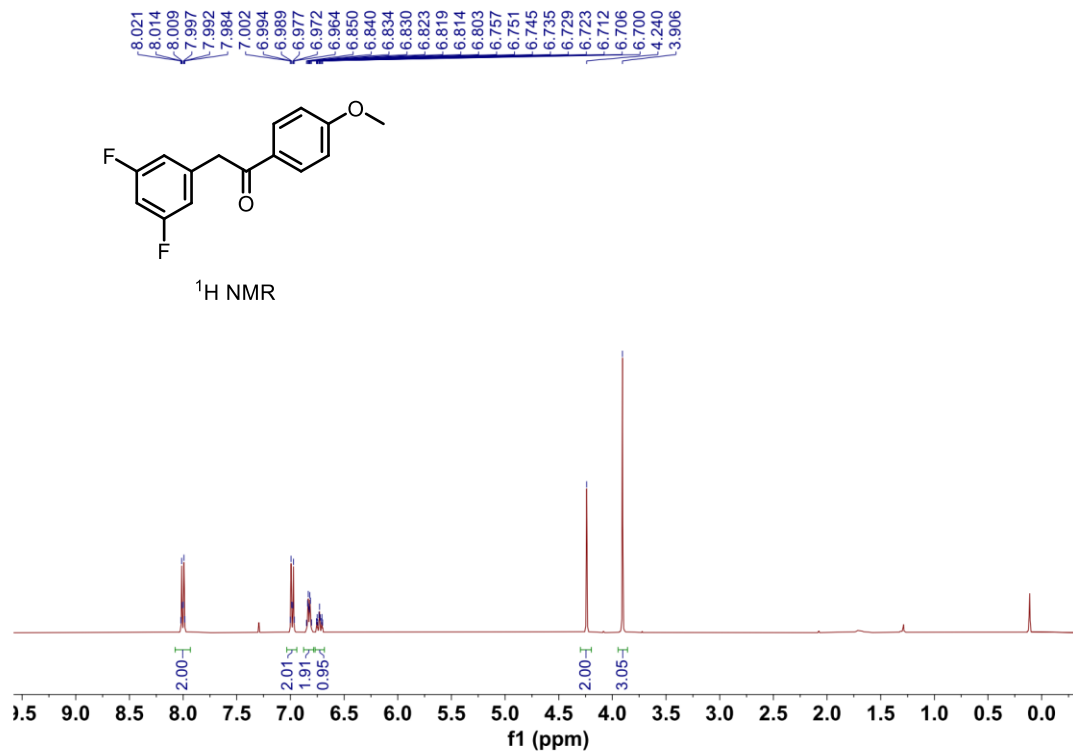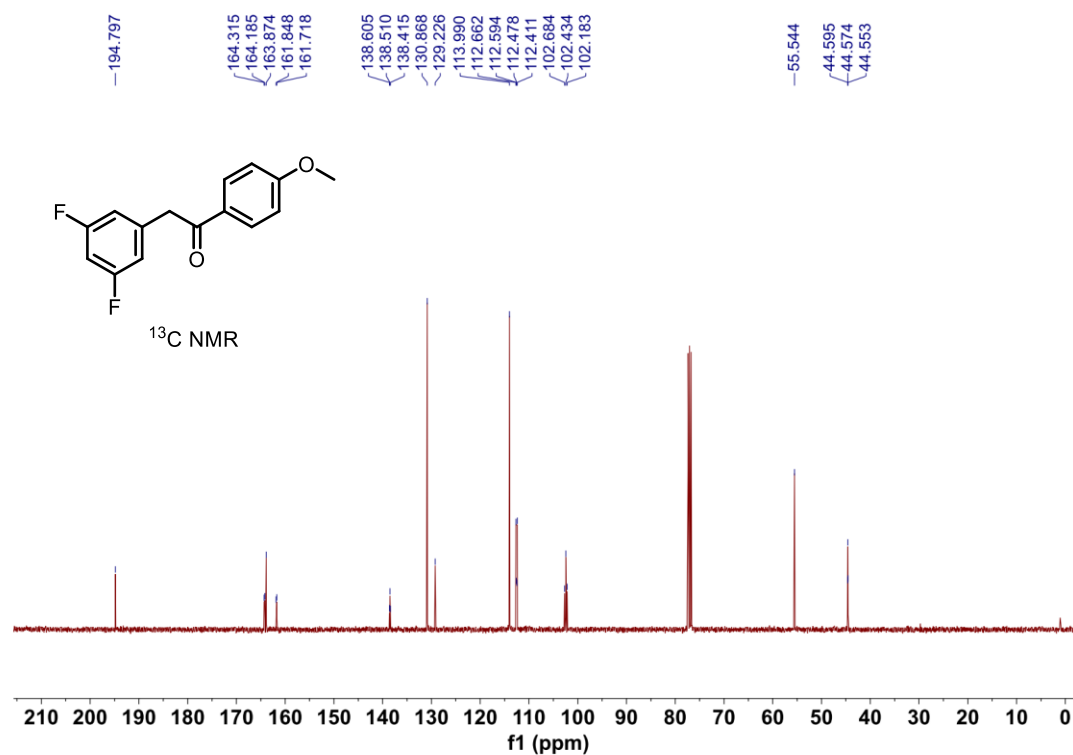

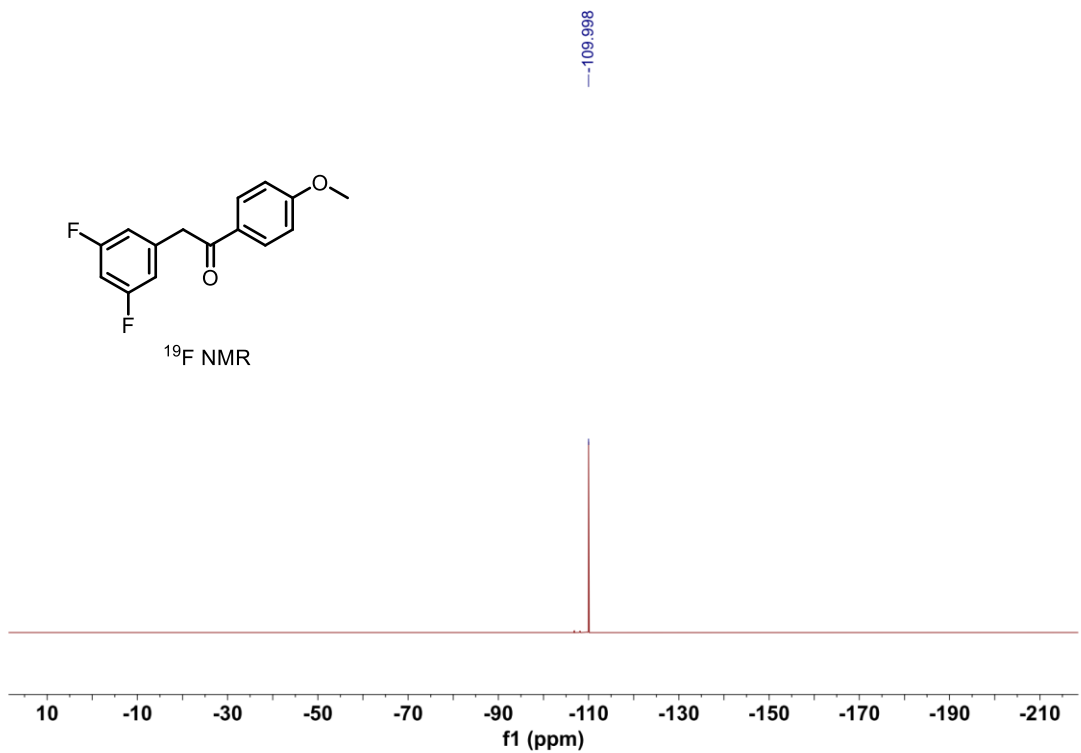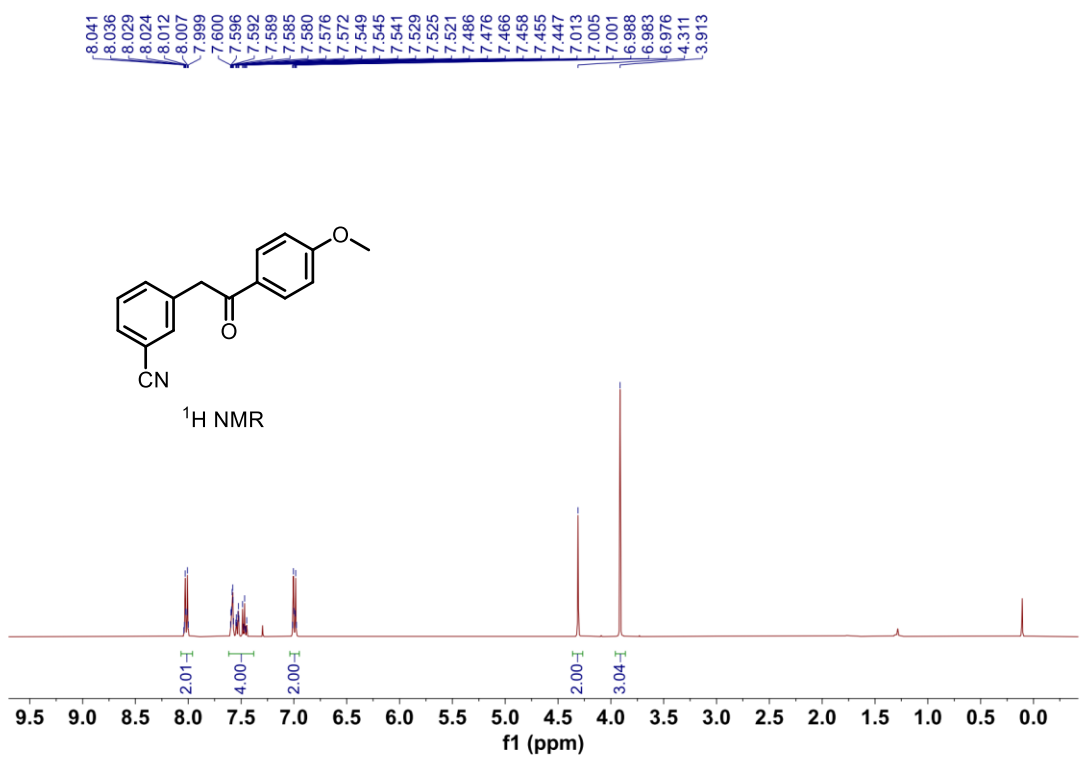

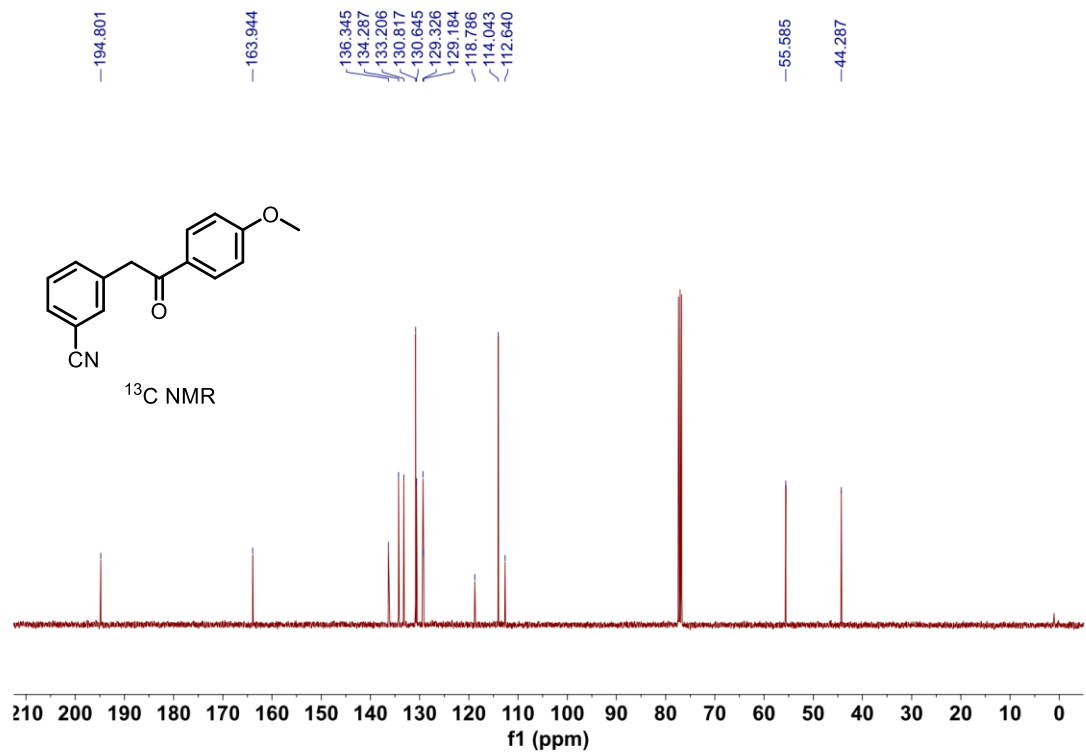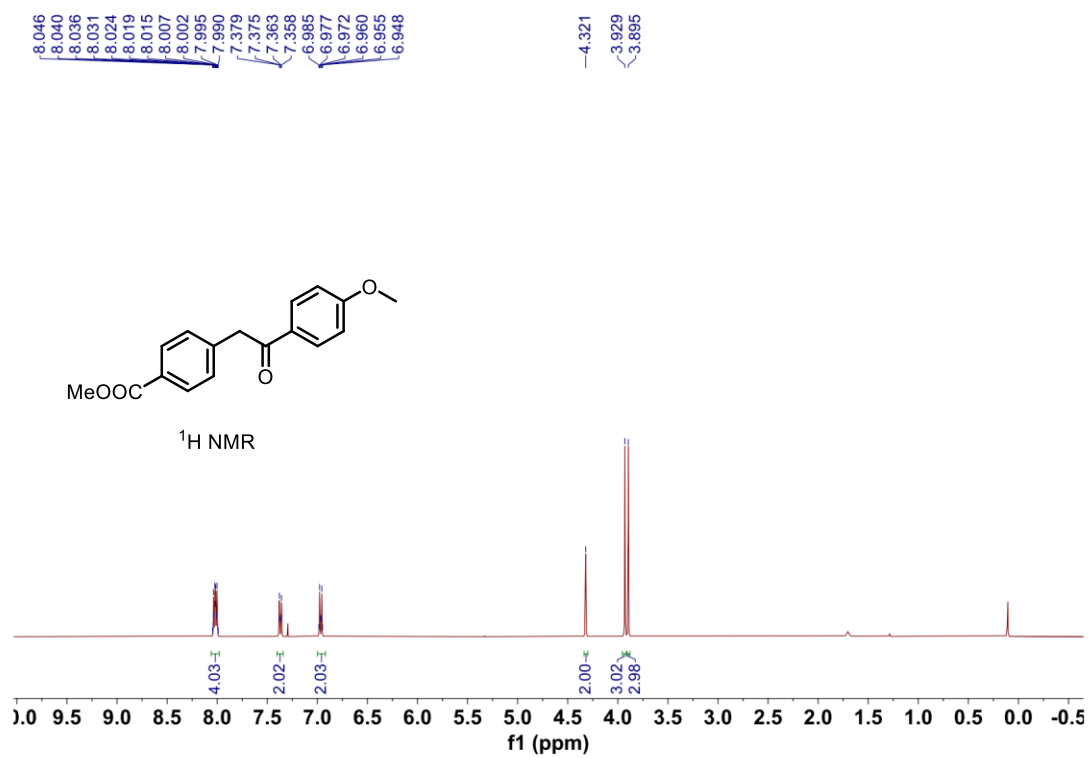

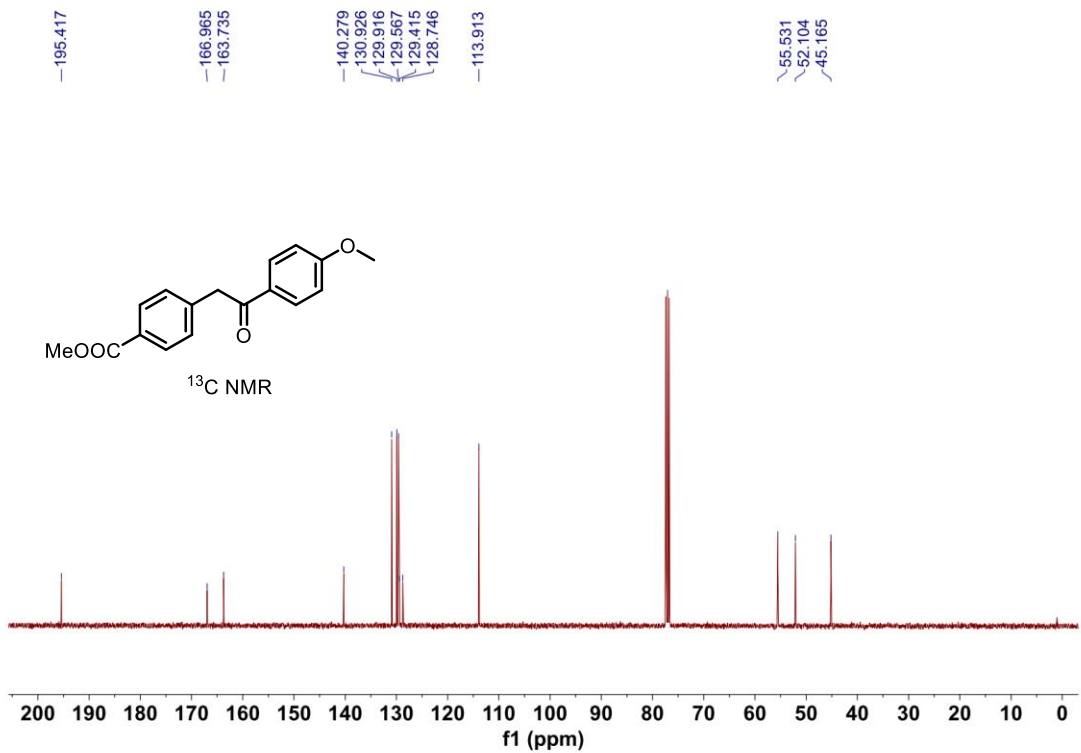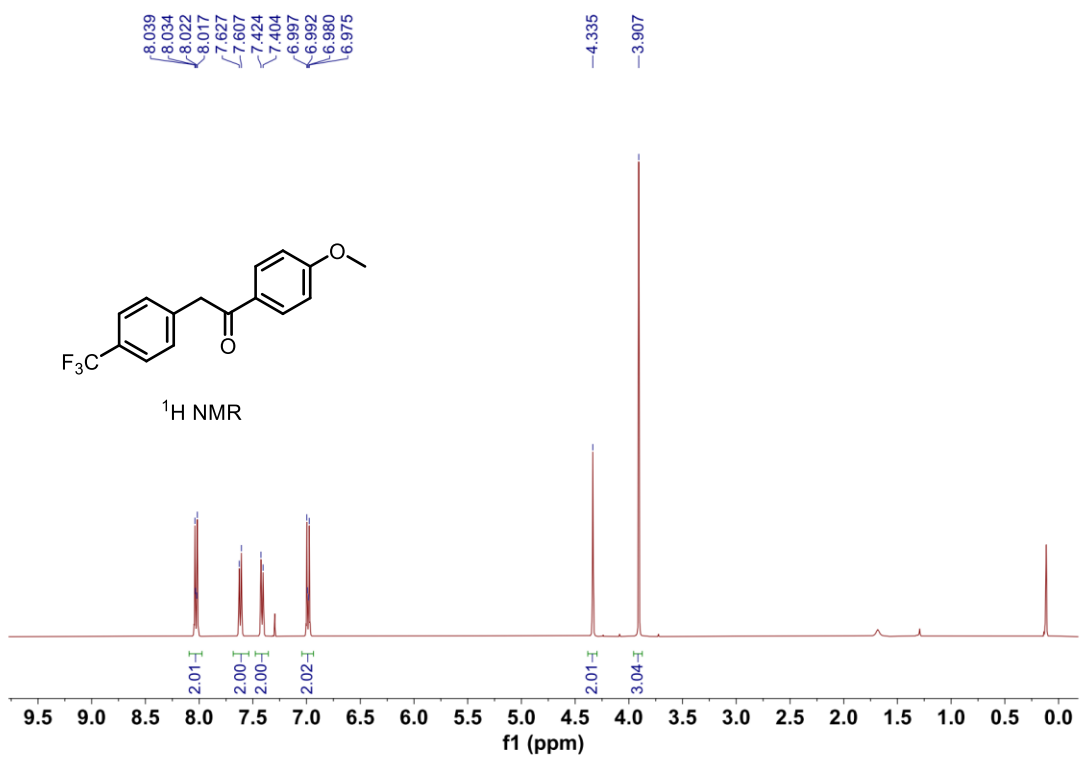

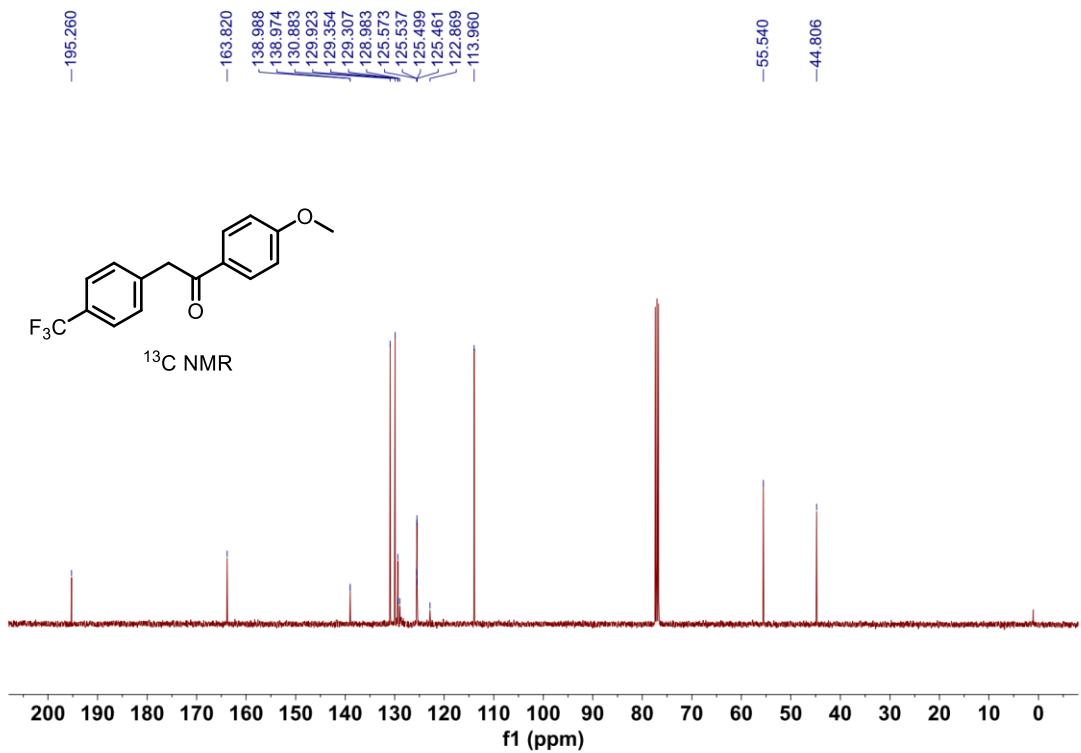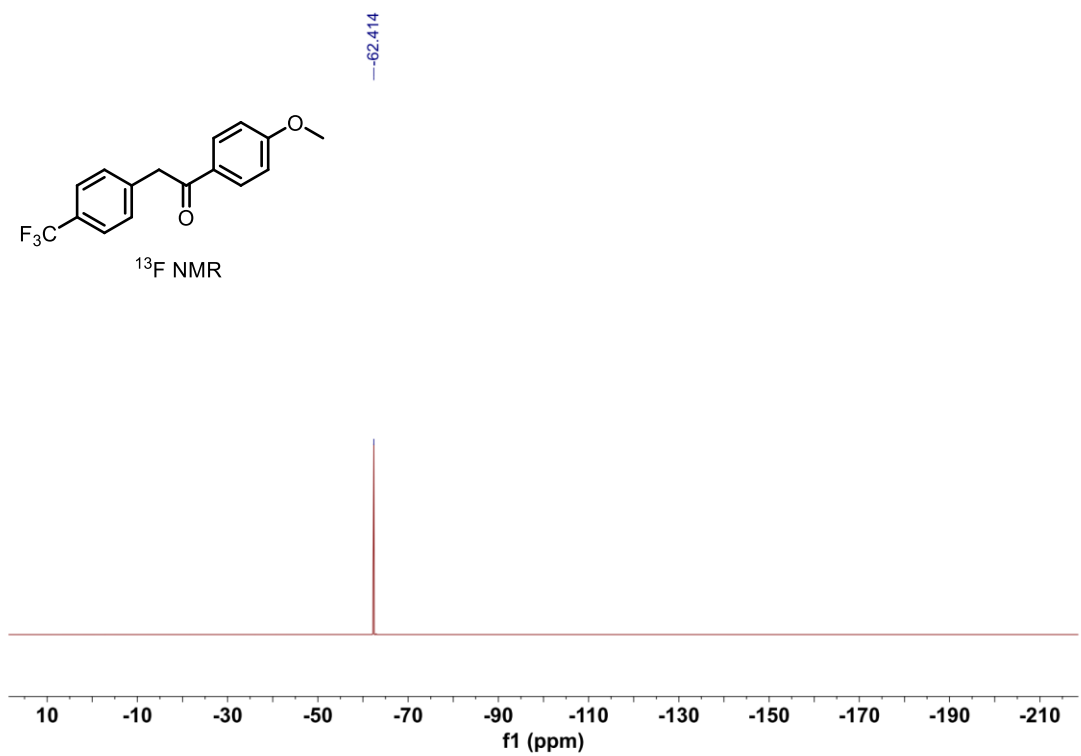

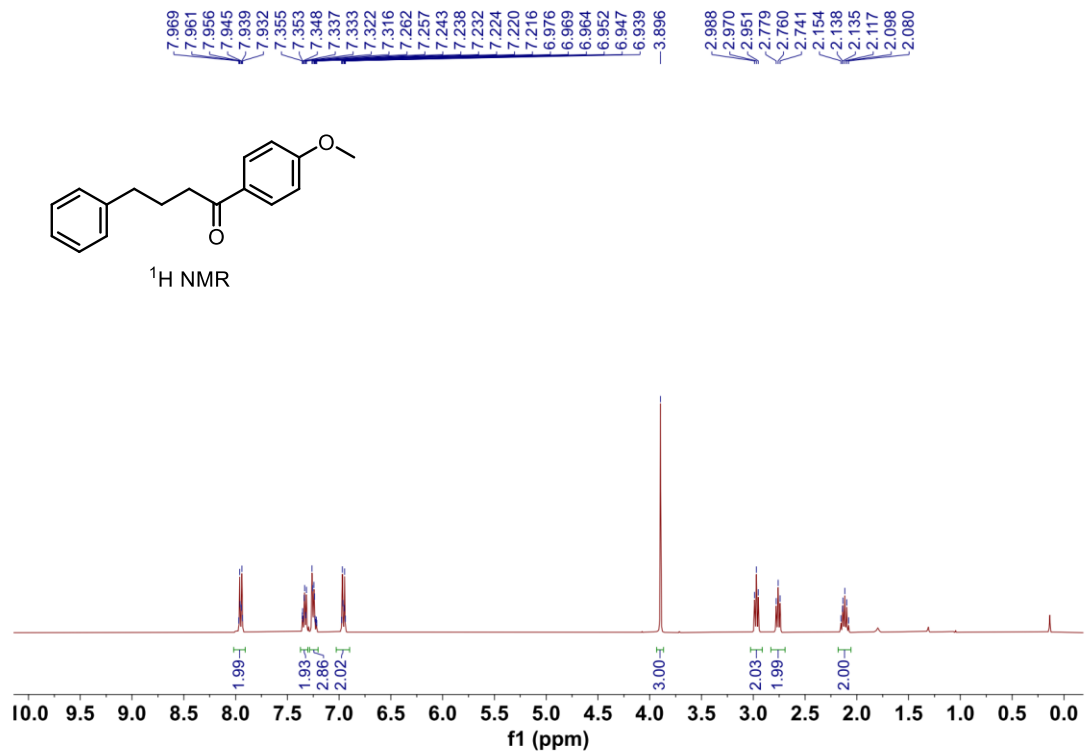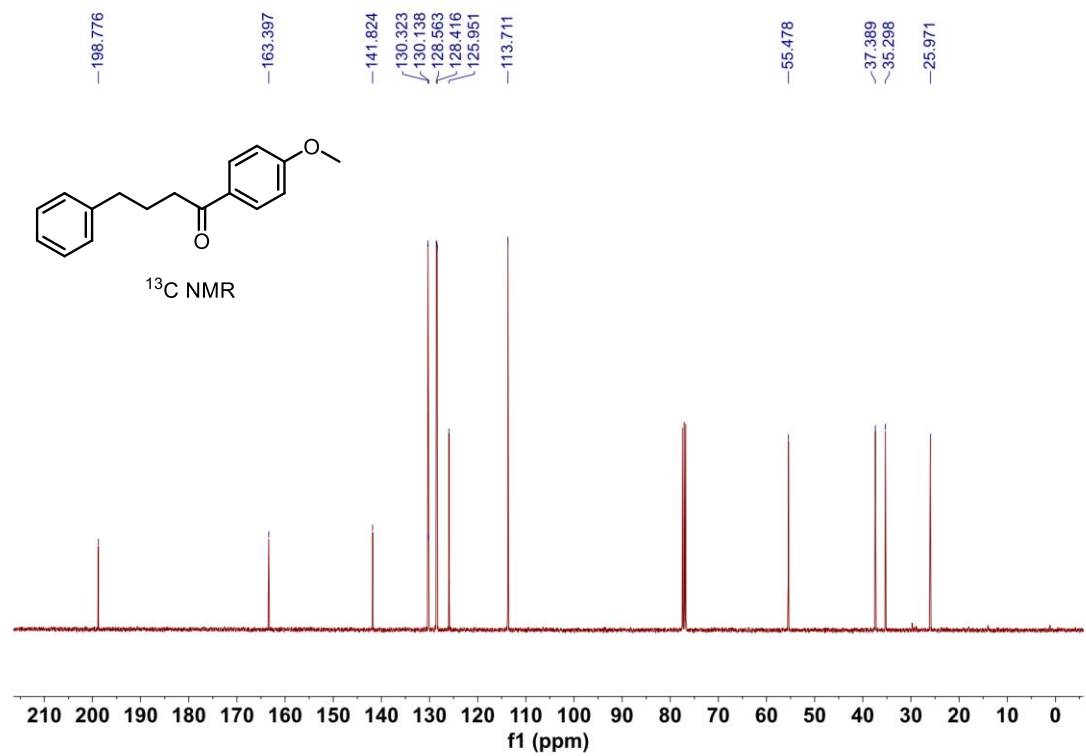



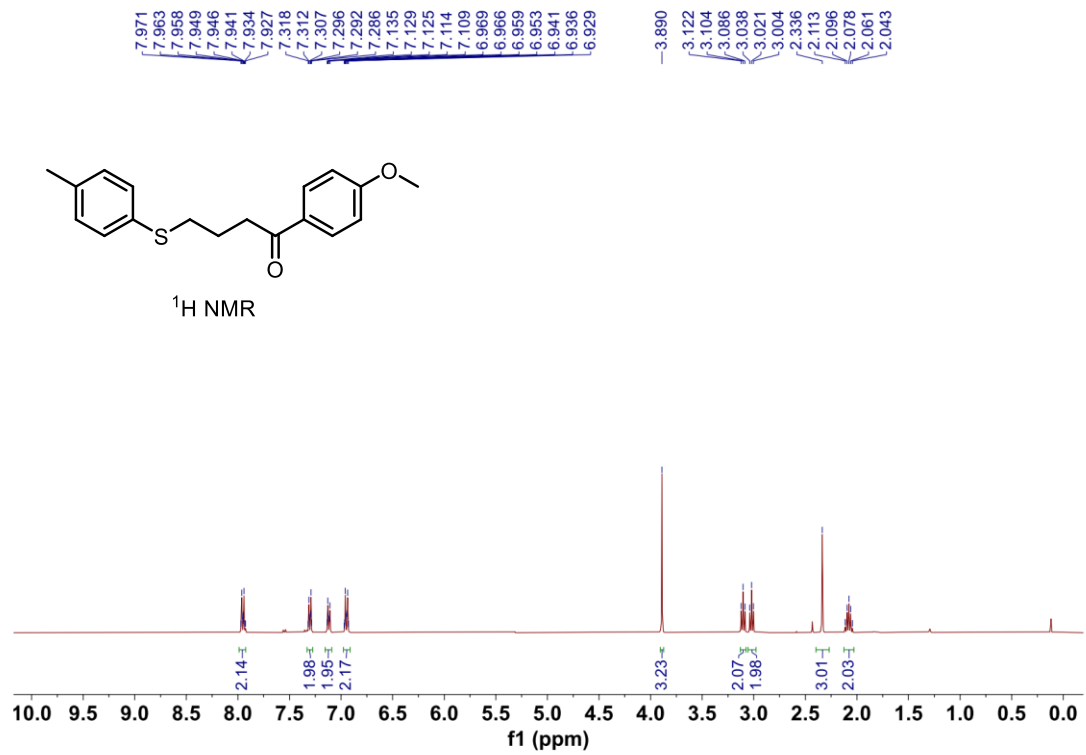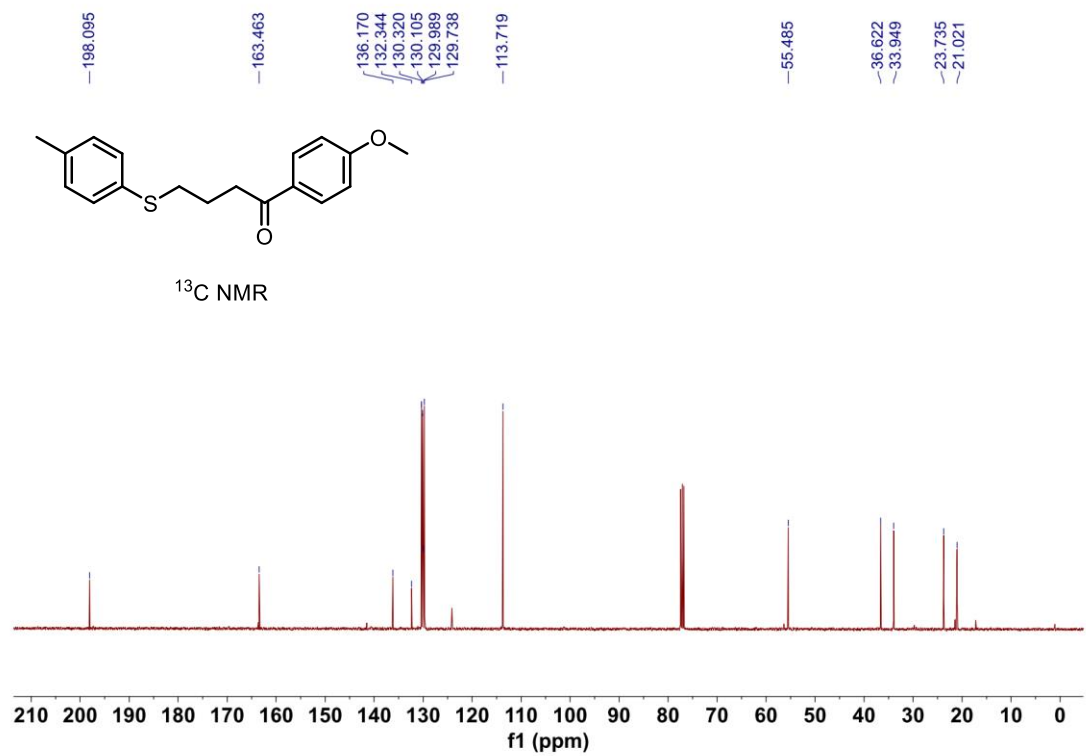

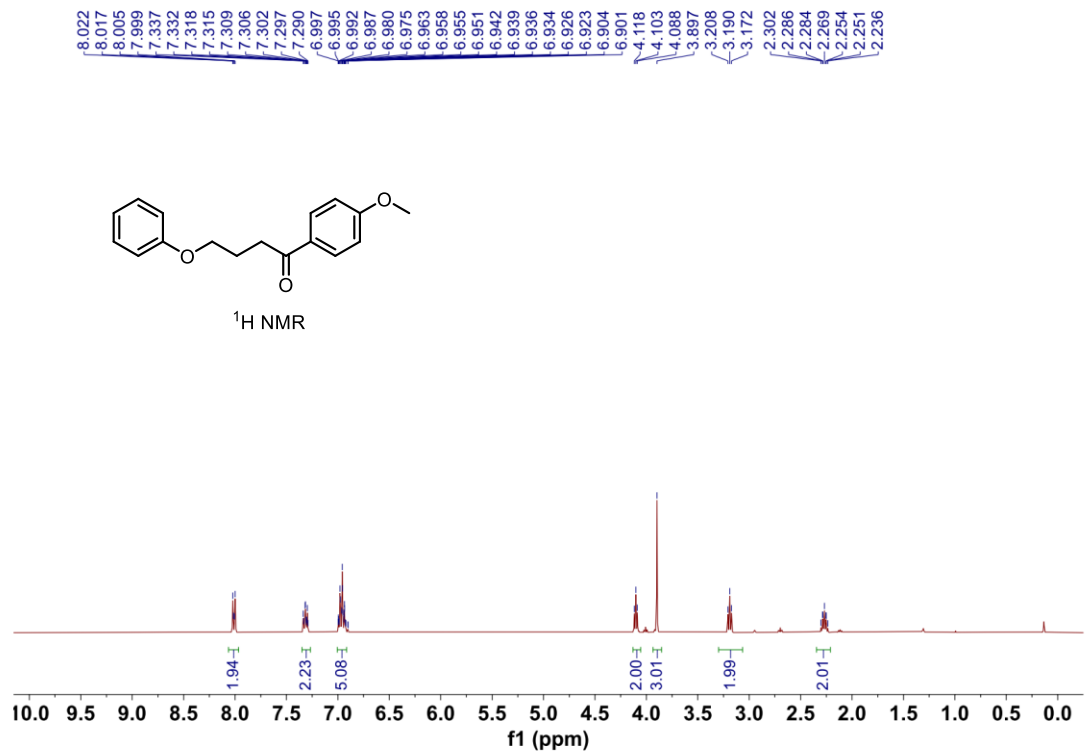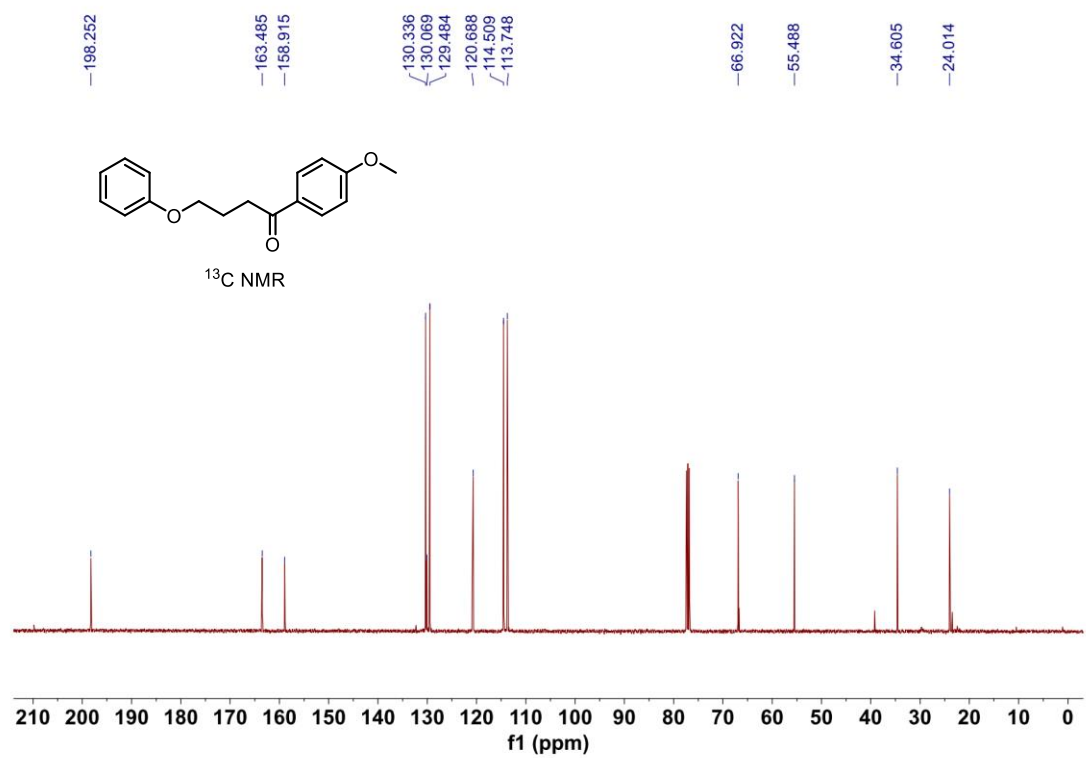

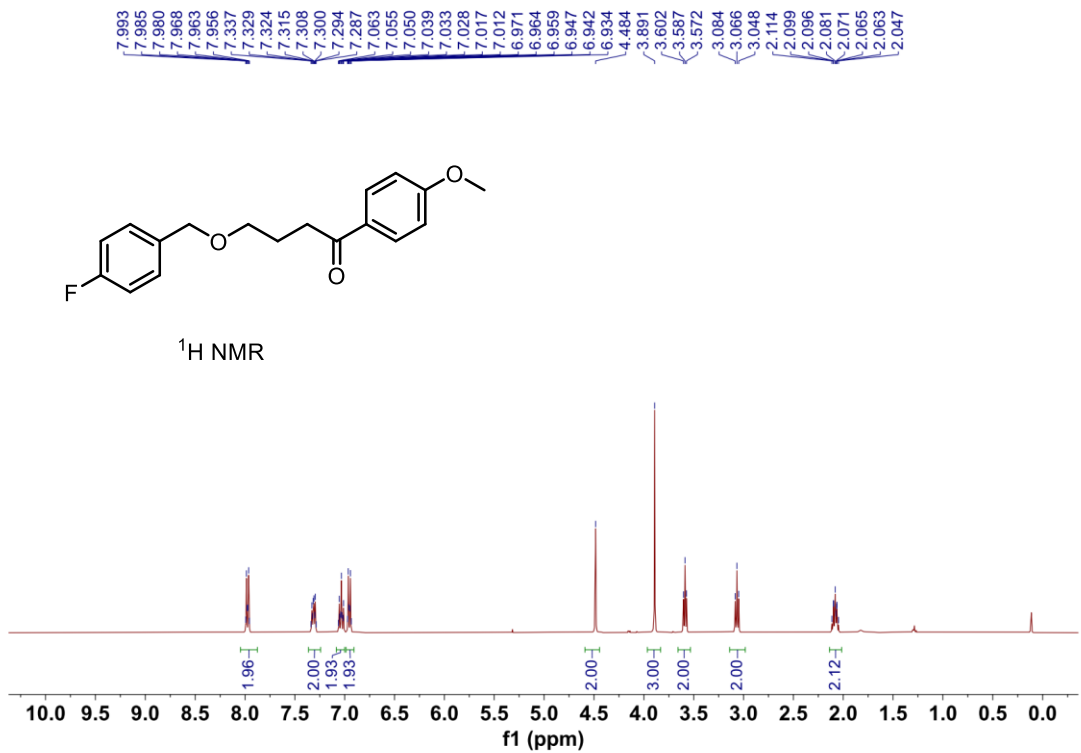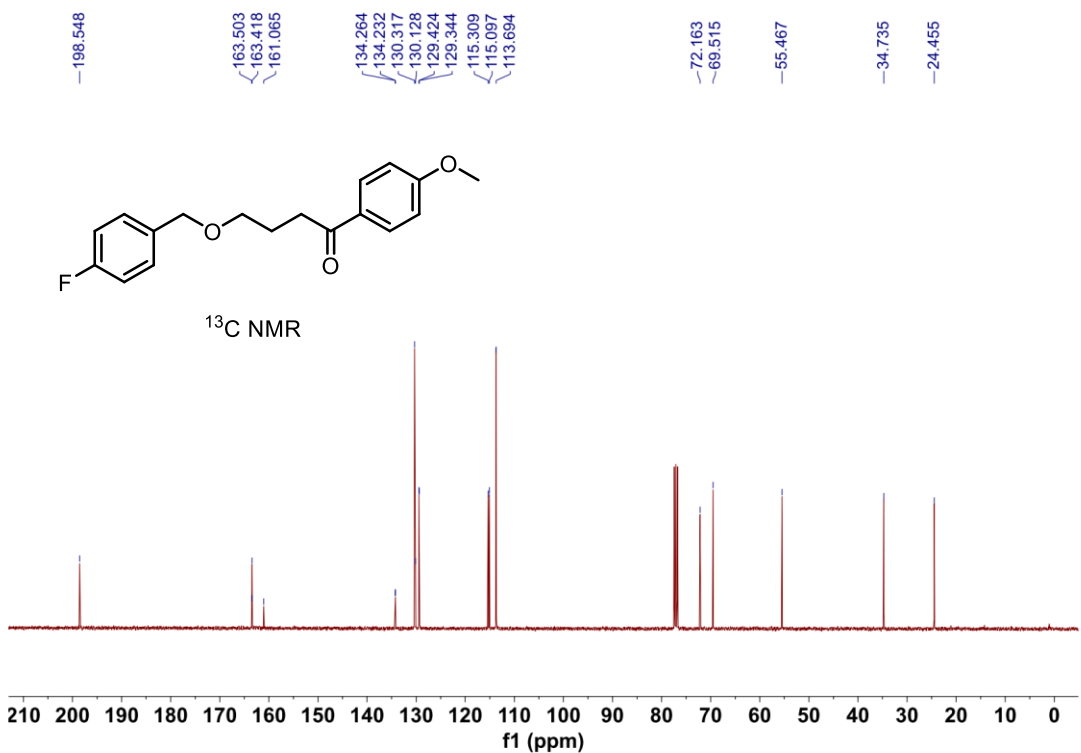

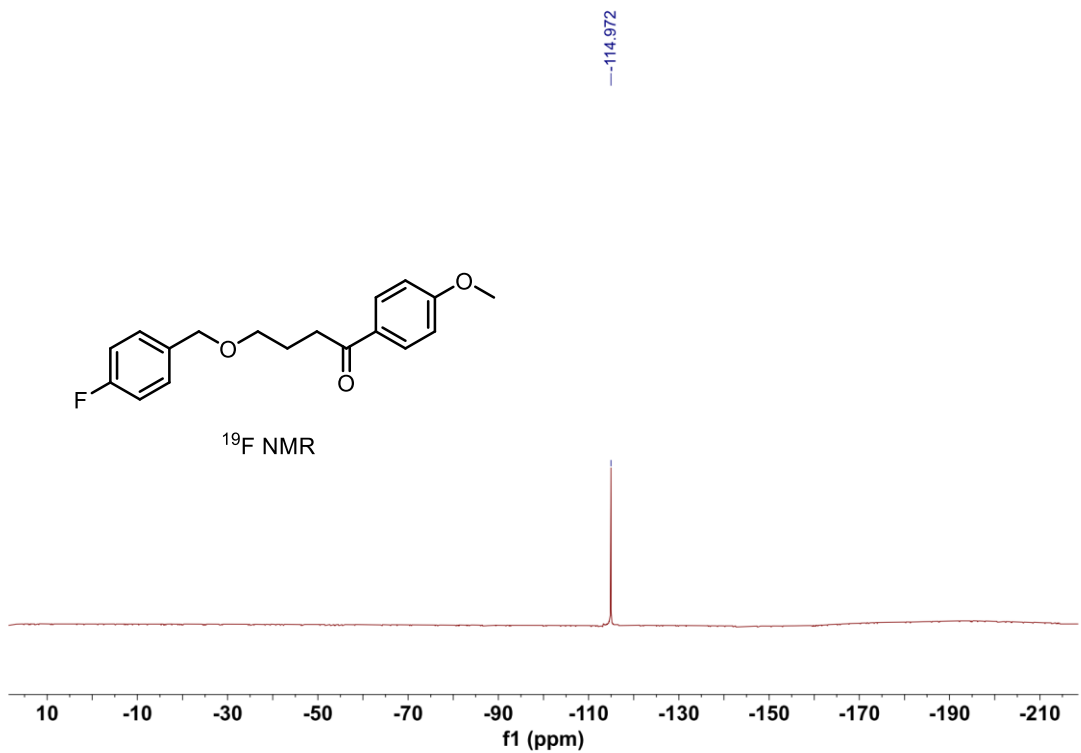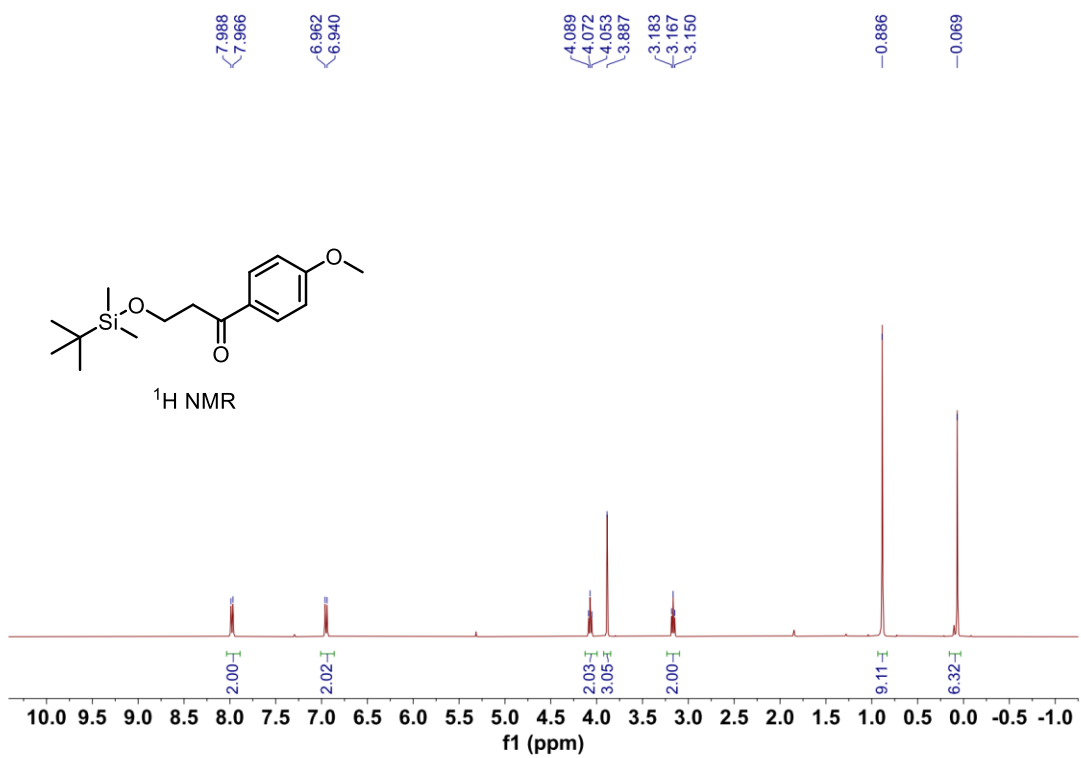

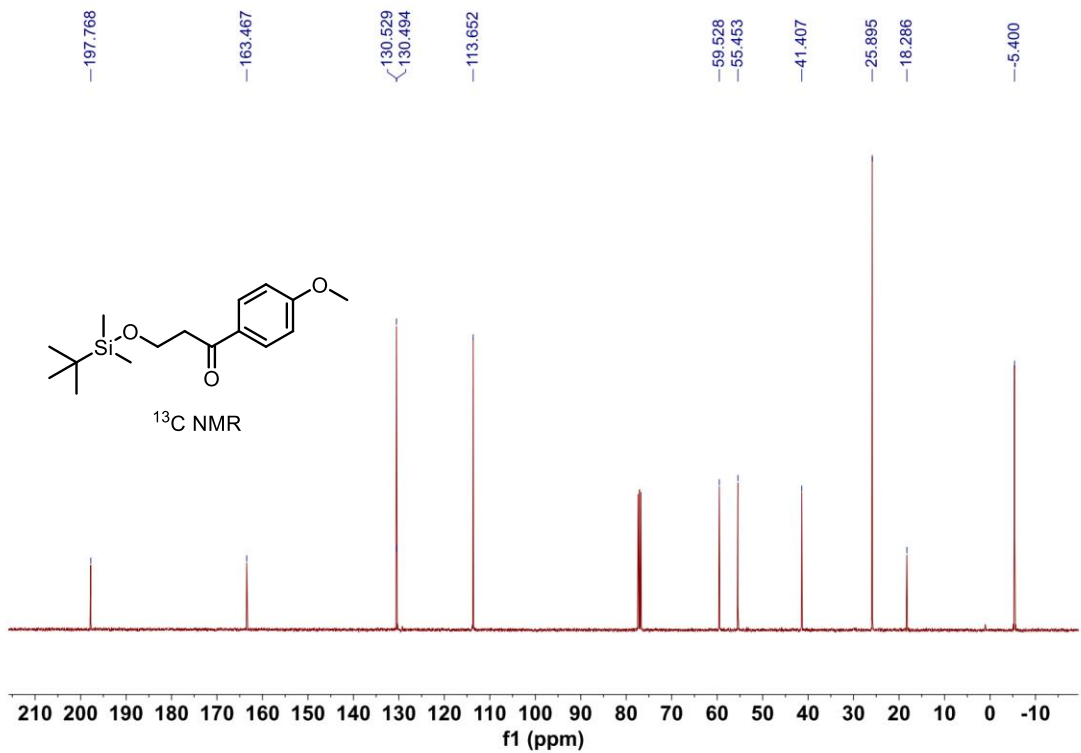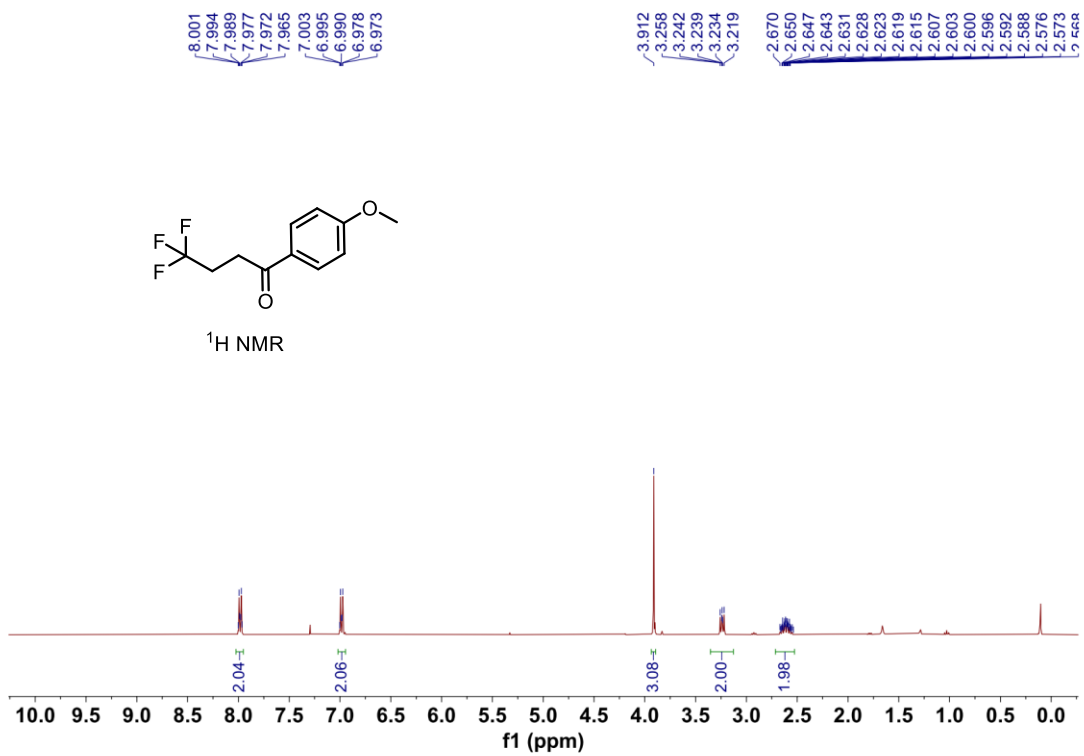

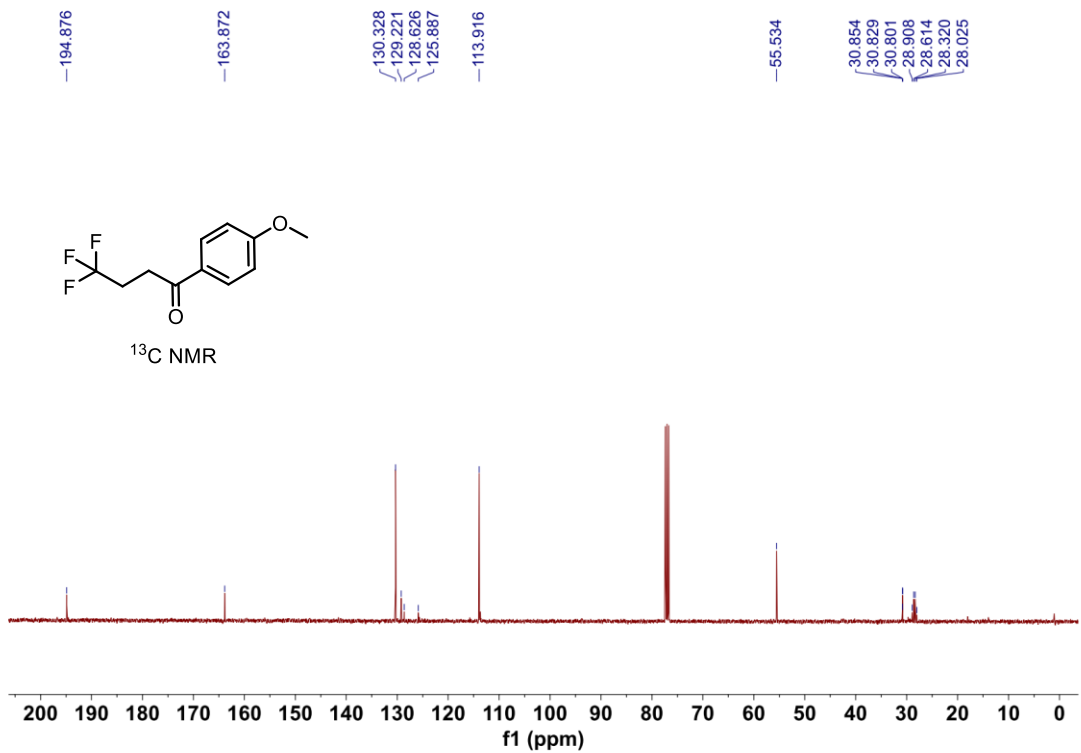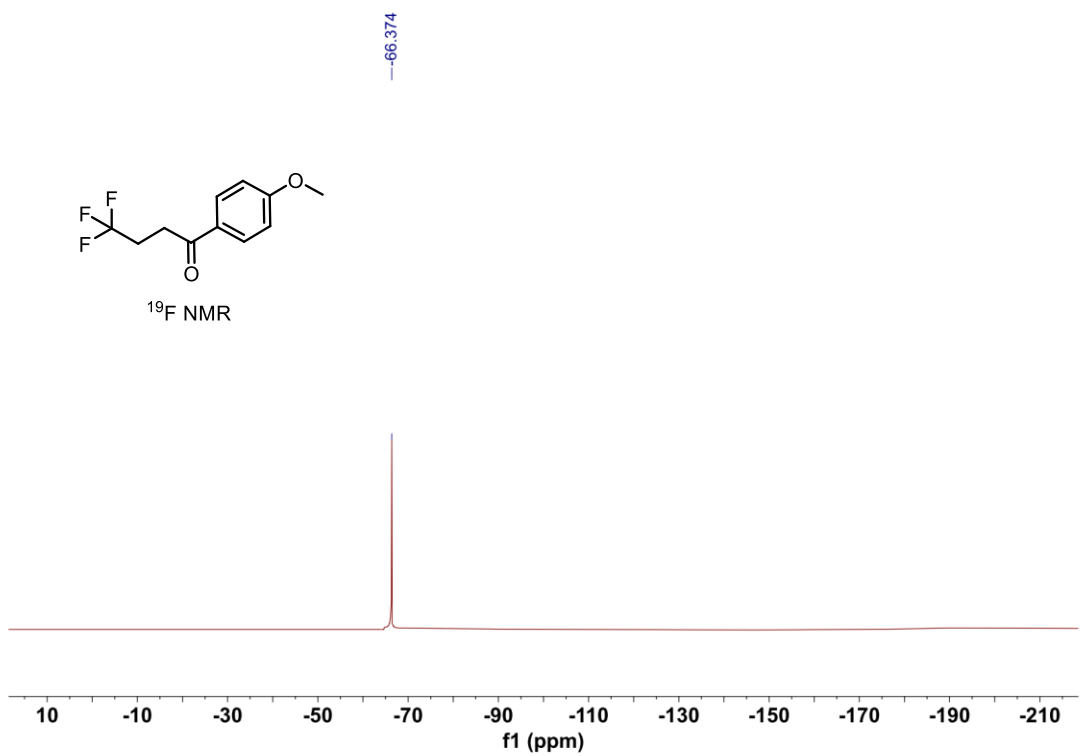

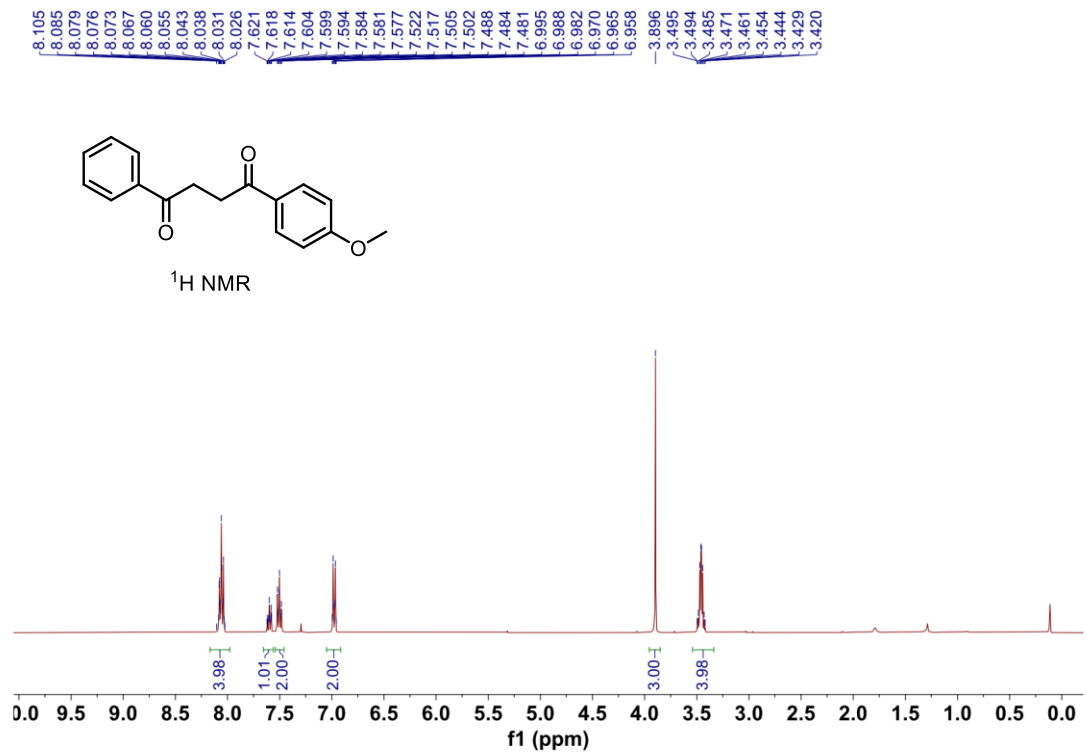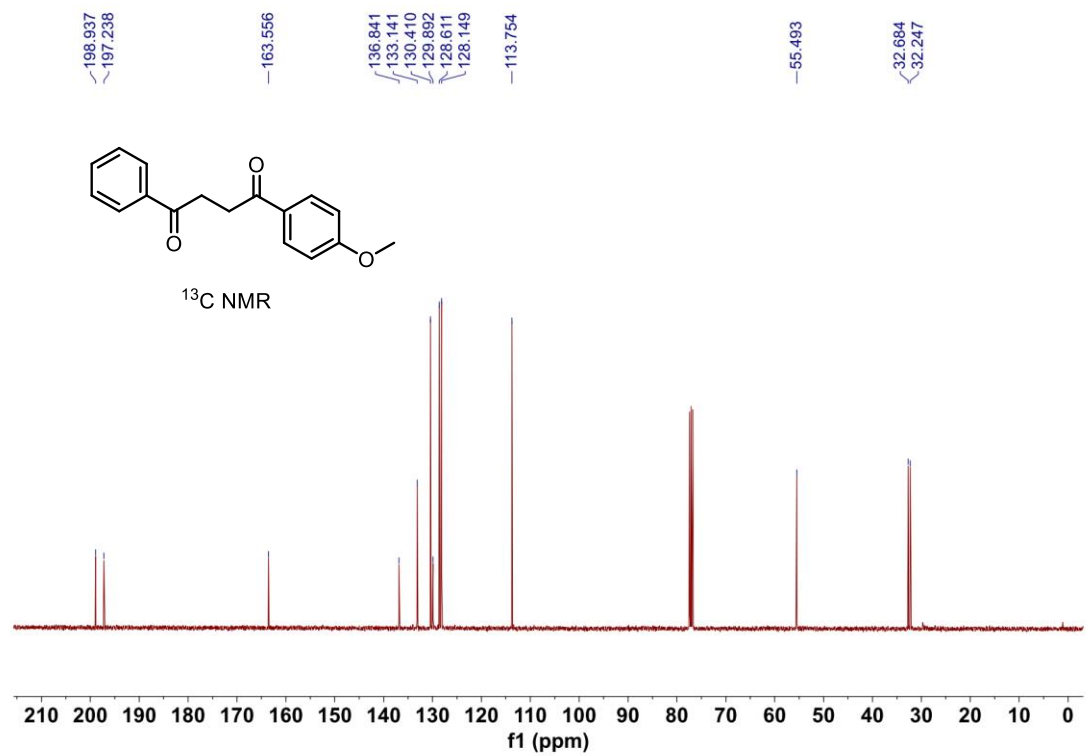

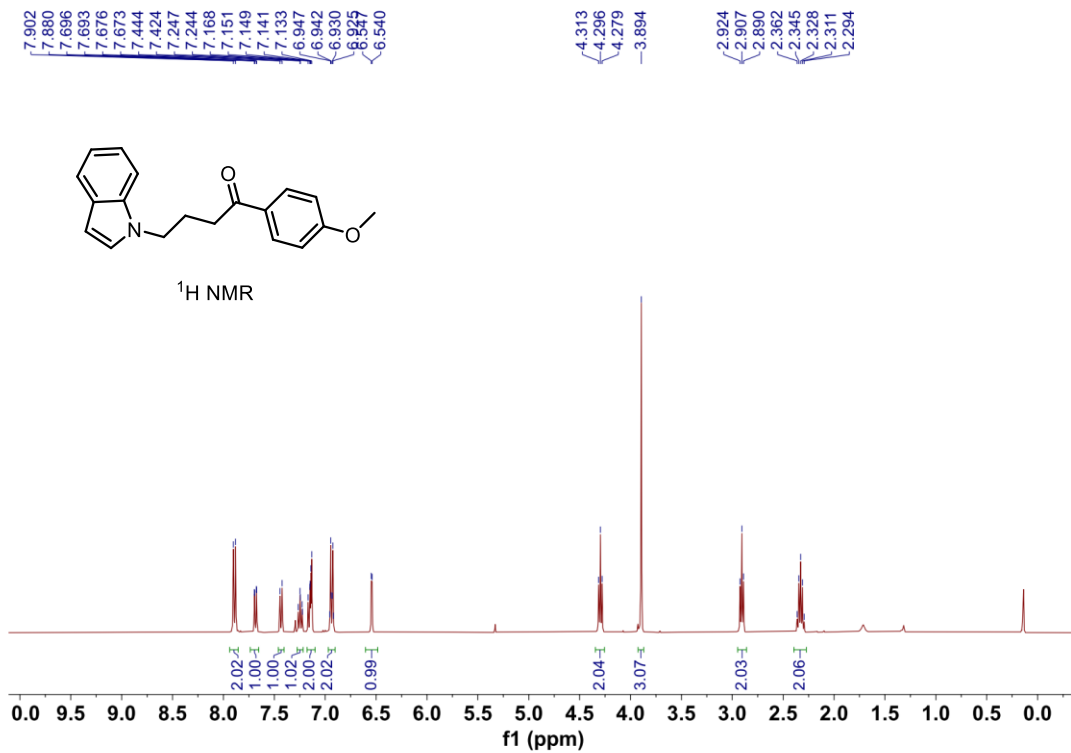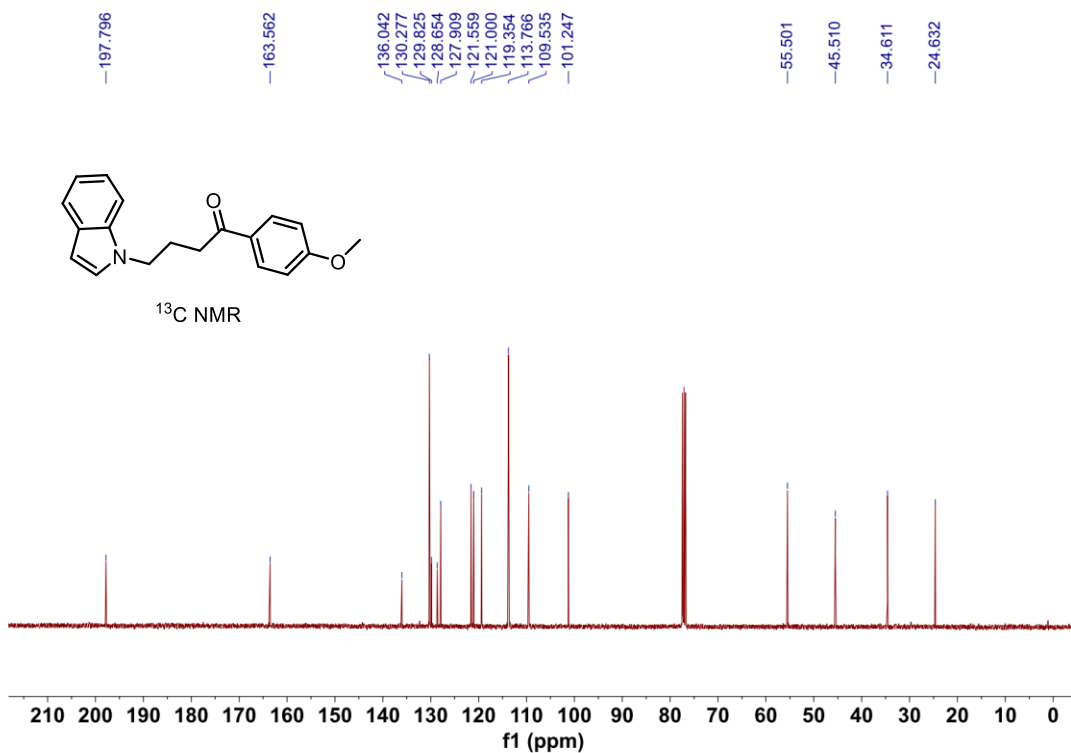



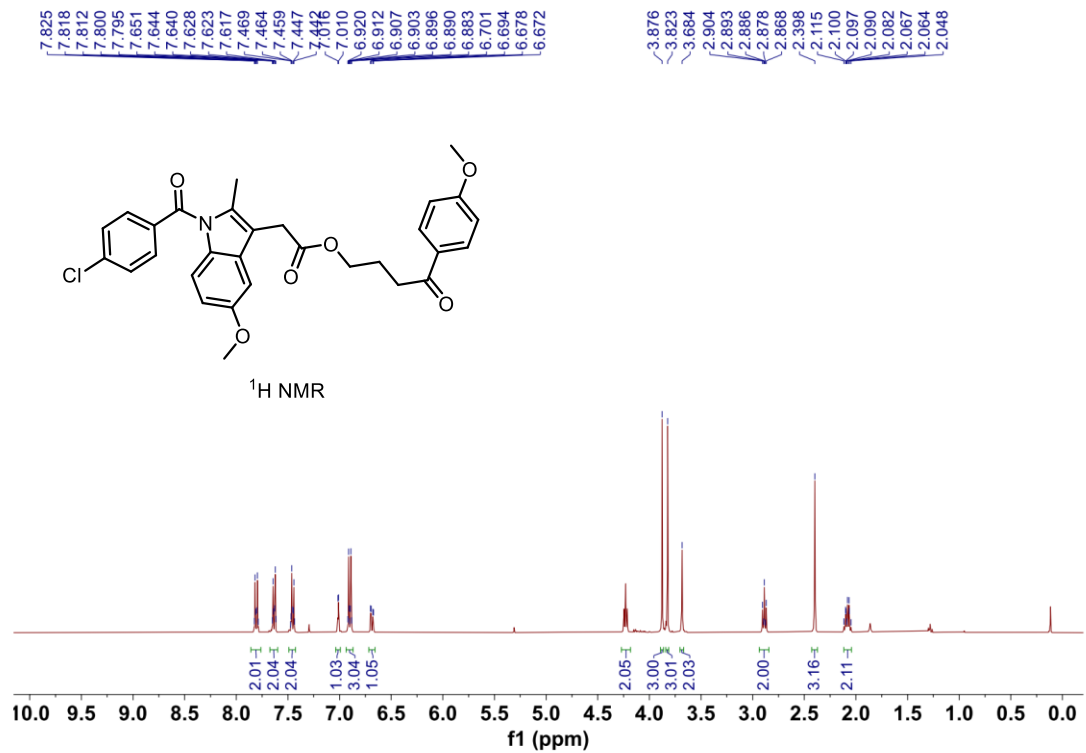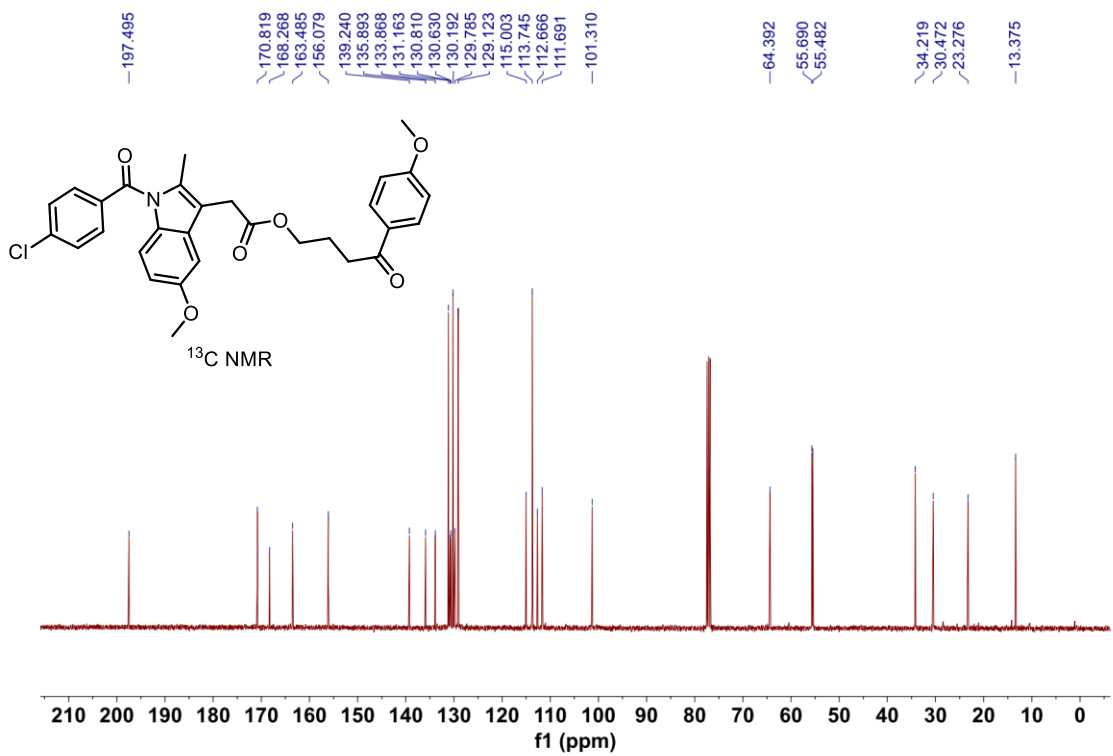

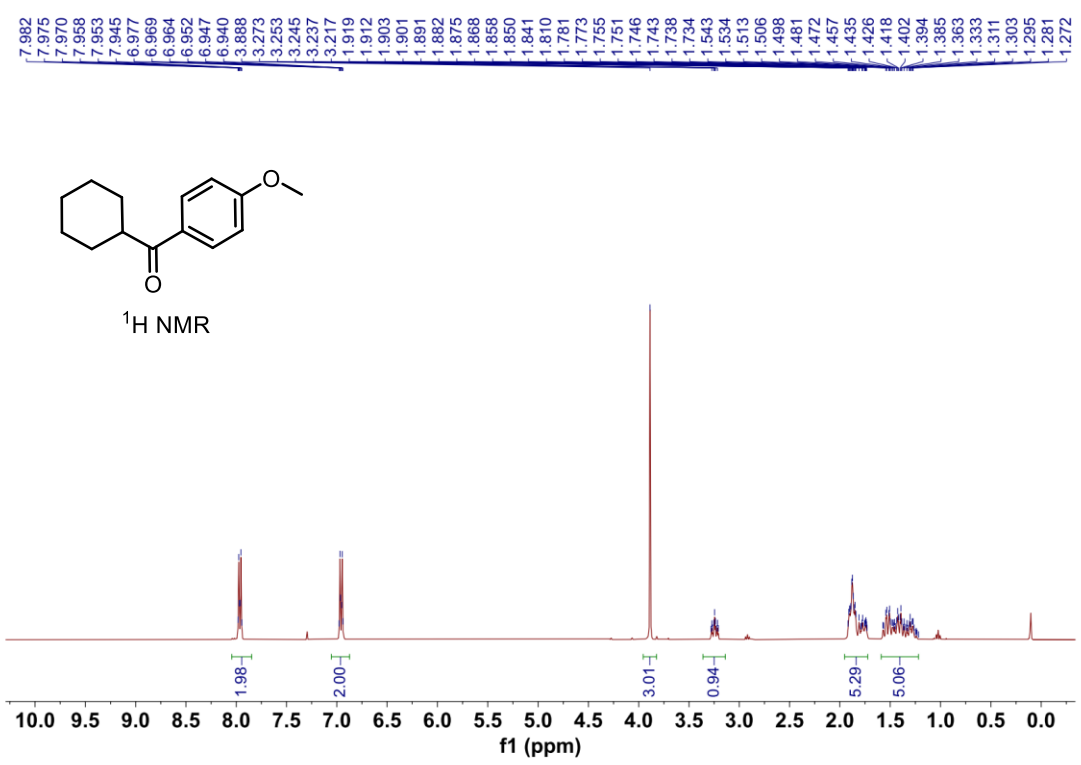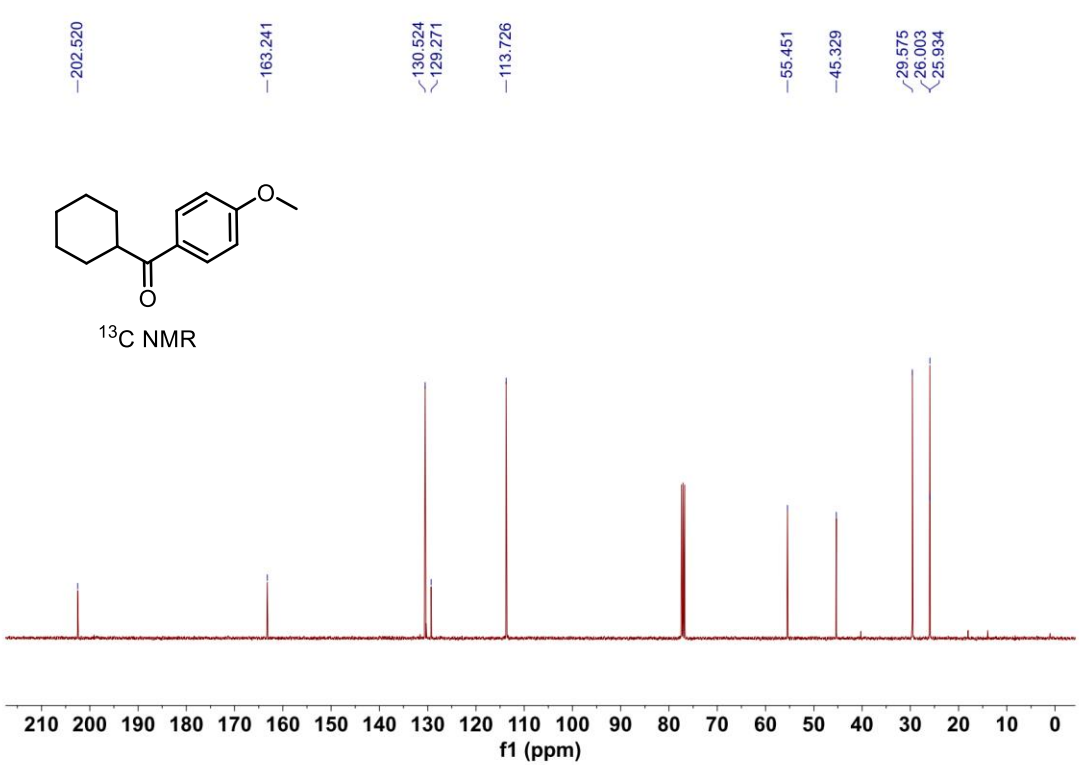

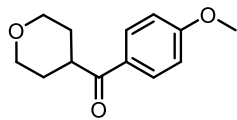

<sup>1</sup>H NMR

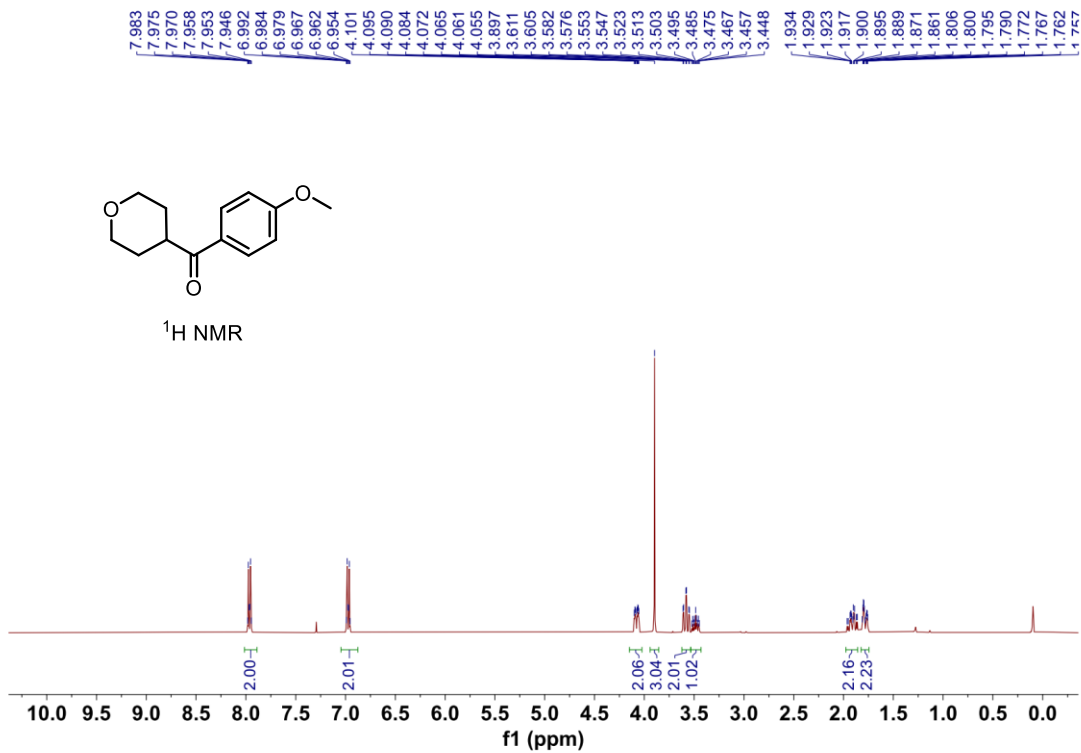

Chemical shifts (ppm): -200.370, -163.492, -130.569, -128.719, -113.902, -67.371, -55.504, -42.262, -29.235.

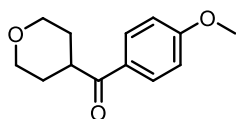

<sup>13</sup>C NMR

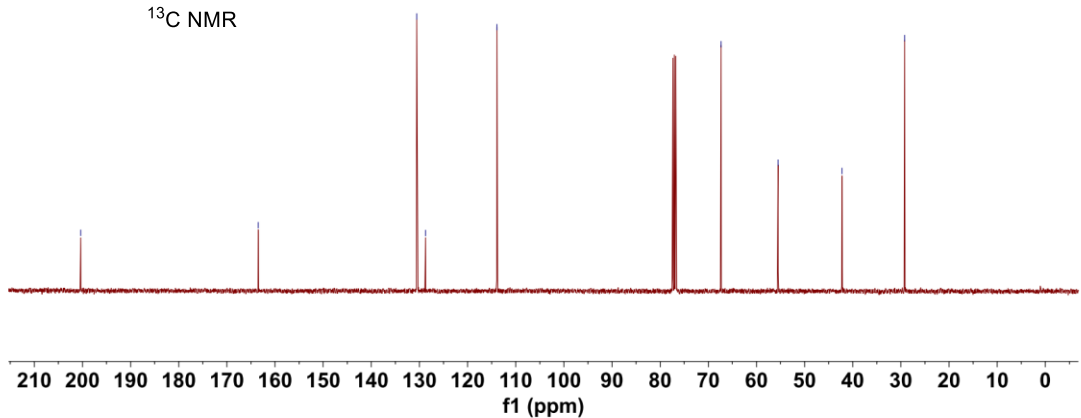

7.969  
7.964  
7.952  
7.947  
6.976  
6.971  
6.959  
6.953  
3.895  
3.428  
3.418  
1.966  
1.957  
1.949  
1.941  
1.939  
1.931  
1.922  
1.913  
1.906  
1.847  
1.839  
1.824  
1.815  
1.806  
1.768  
1.744  
1.736  
1.733  
1.725  
1.719  
1.709  
1.700  
1.688  
1.684  
1.676  
1.673  
1.667  
1.663  
1.659  
1.654  
1.651  
1.648  
1.647  
1.642  
1.638  
1.629  
1.625  
1.612  
1.607  
1.604  
1.596  
1.593  
1.586  
1.578  
1.574  
1.565  
1.562  
1.554

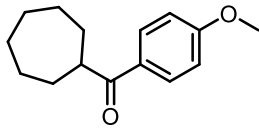

<sup>1</sup>H NMR

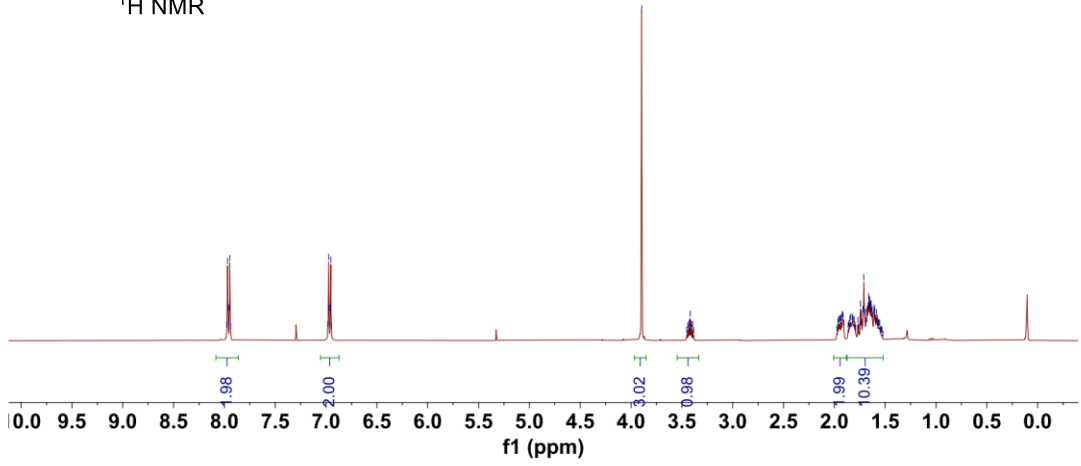

-203.001

-163.194

-130.554

-129.294

-113.719

-55.459

-46.324

-31.017

-28.358

-26.869

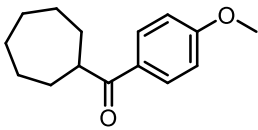

<sup>13</sup>C NMR

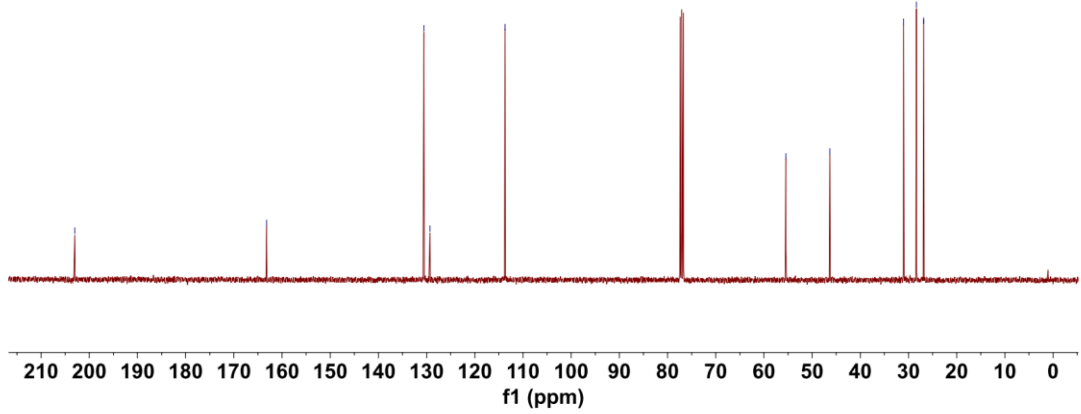

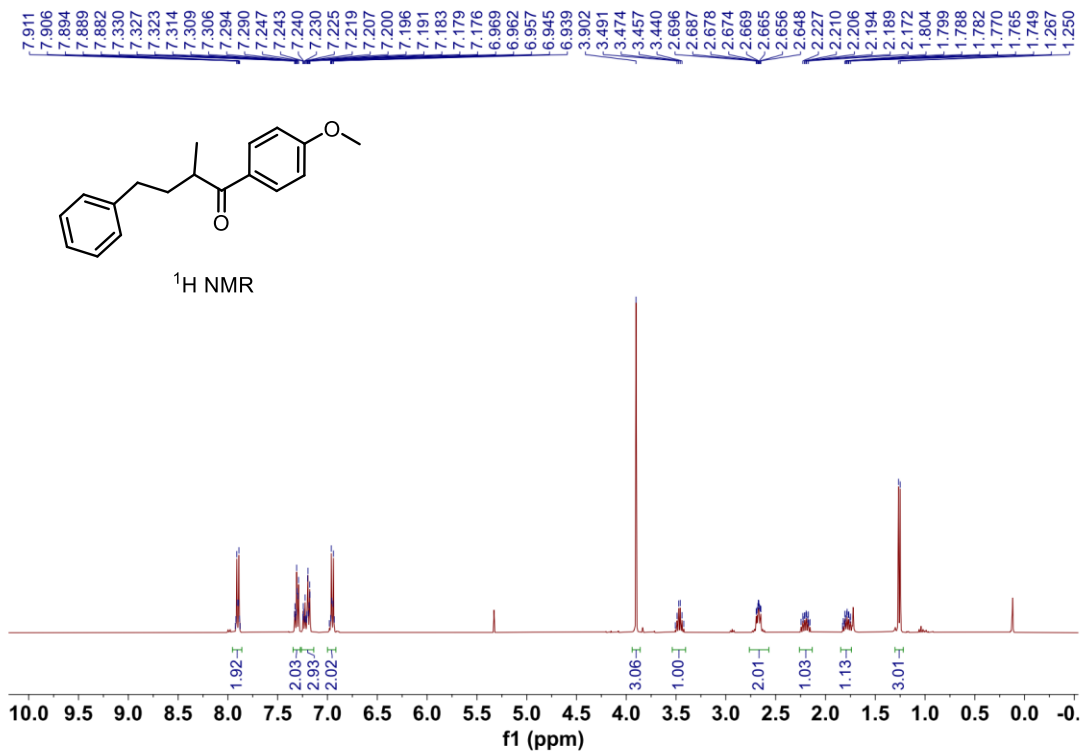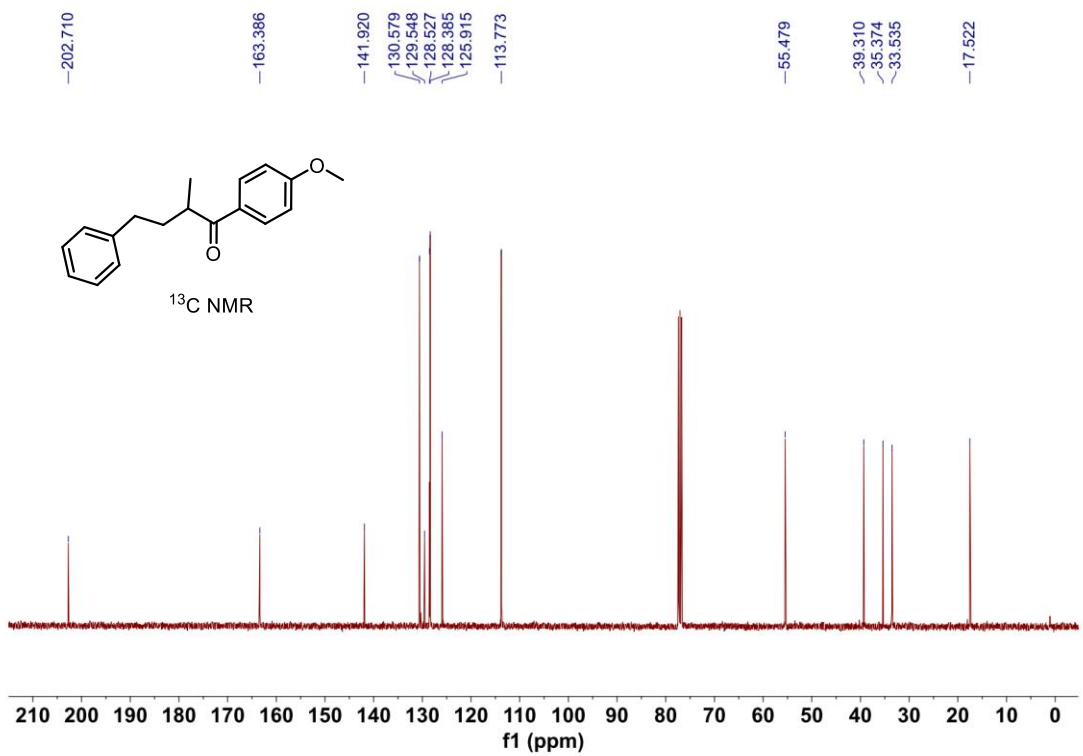

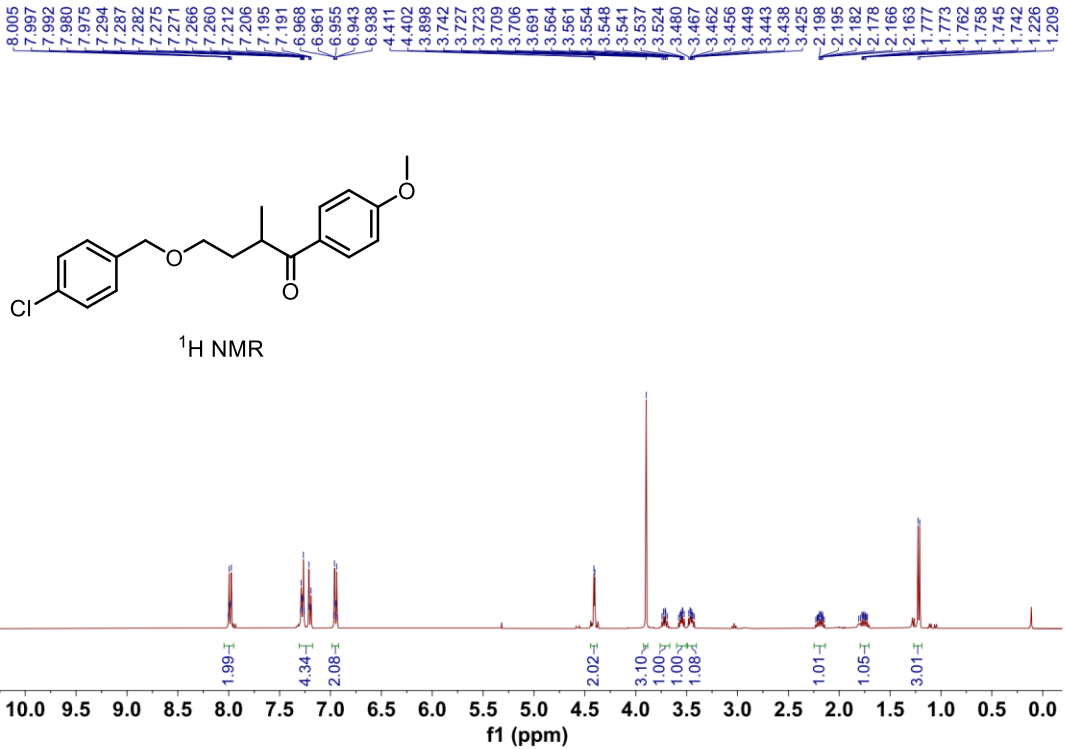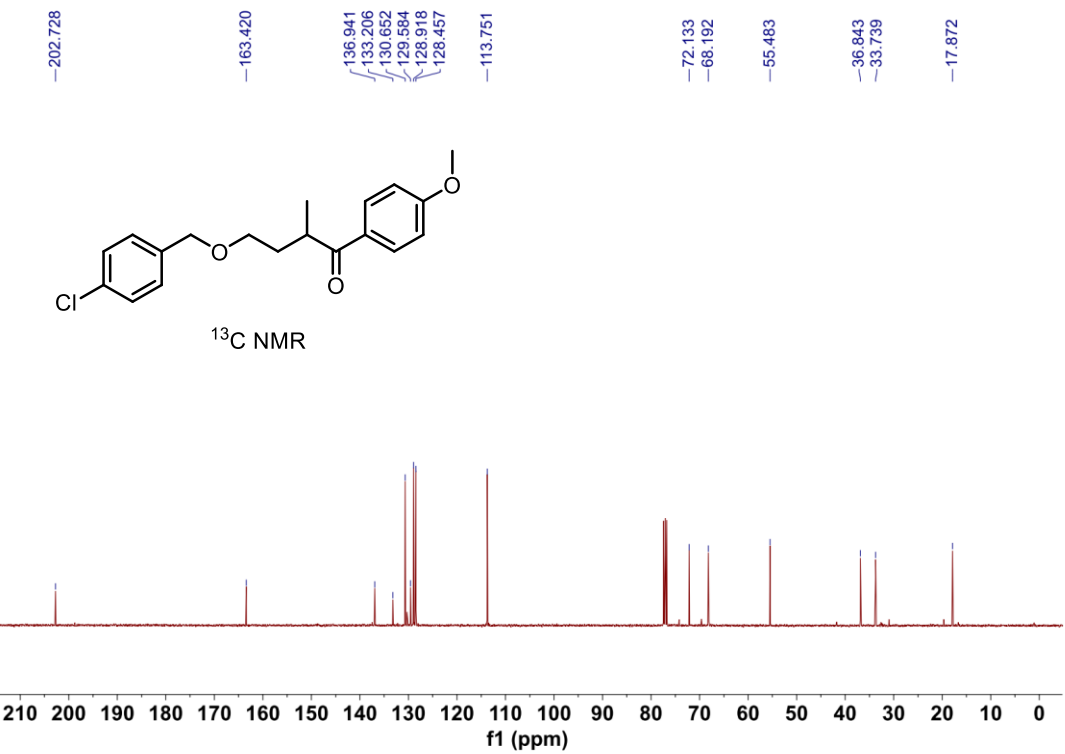

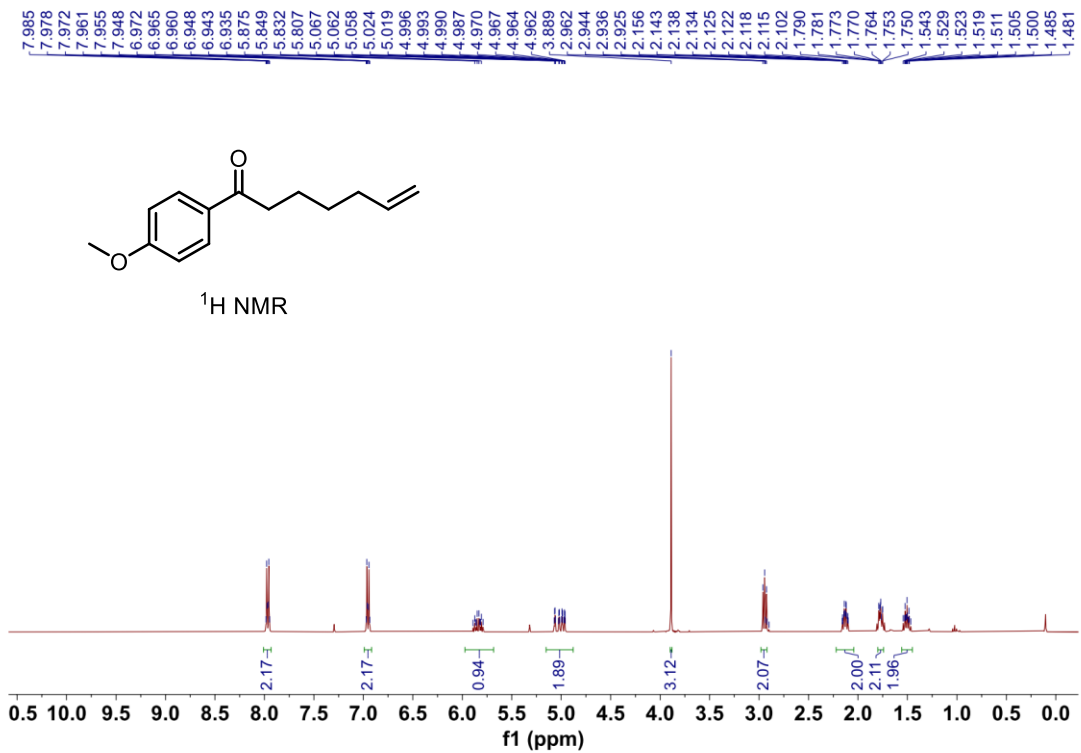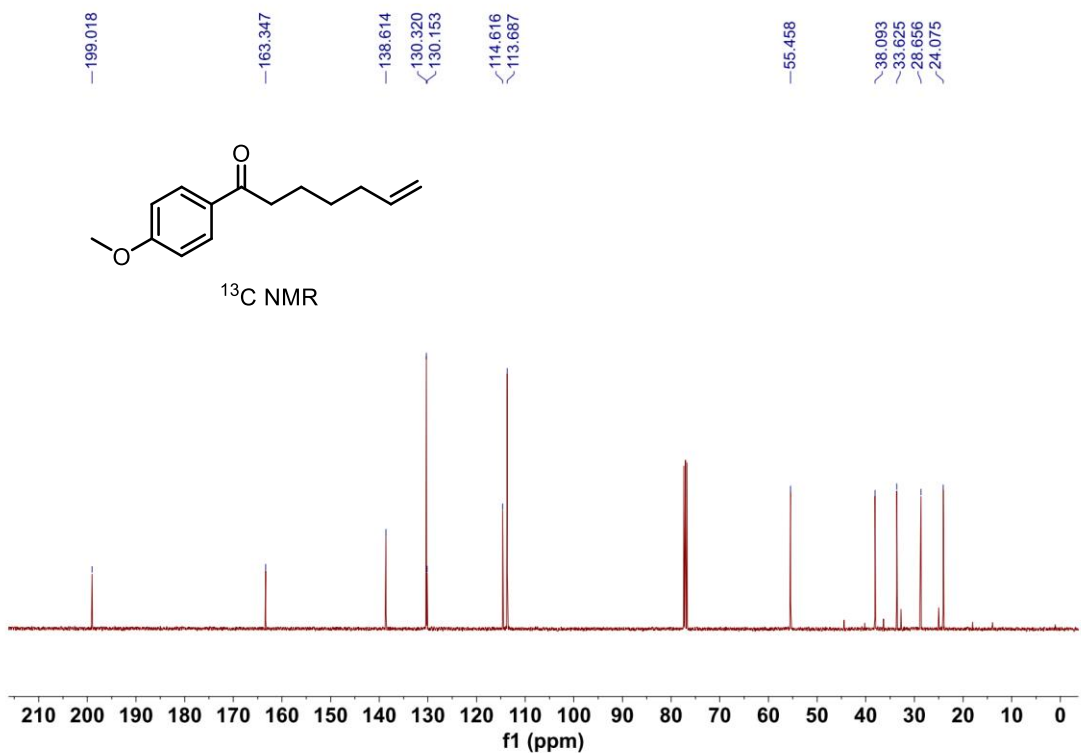

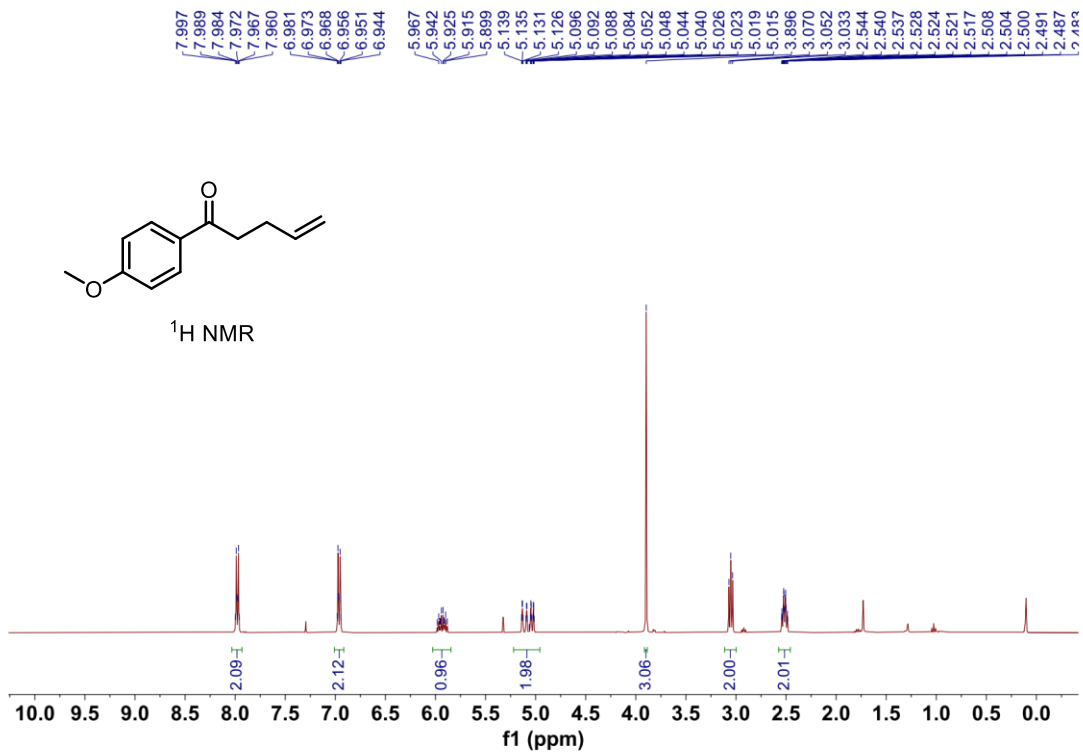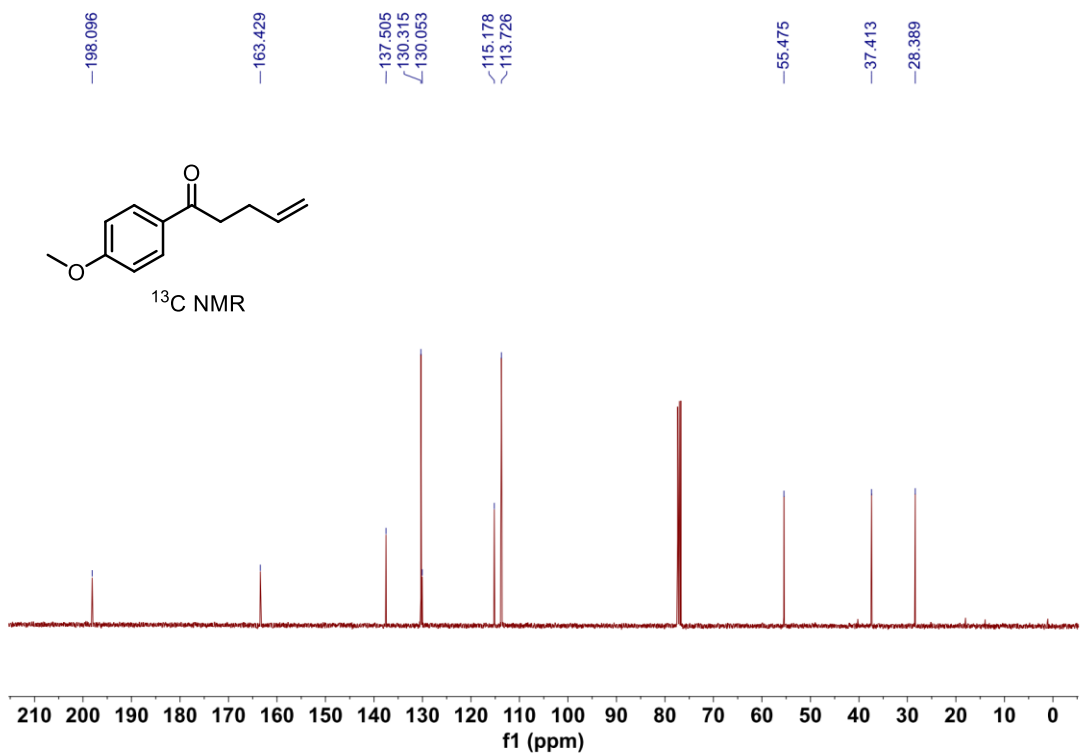



## References

- [1] L. Huang, T. Ji, C. Zhu, H. Yue, N. Zhumabay, M. Rueping, *Nat. Commun.* **2022**, *13*, 809-818.
- [2] D.-T. Yang, Q. Meng, J.-J. Zhong, M. Xiang, Q. Liu, L.-Z. Wu, *Eur. J. Org. Chem.* **2013**, *33*, 7528-7532.
- [3] M. J. Frisch, G. W. Trucks, H. B. Schlegel, G. E. Scuseria, M. A. Robb, J. R. Cheeseman, G. Scalmani, V. Barone, G. A. Petersson, H. Nakatsuji, X. Li, M. Caricato, A. V. Marenich, J. Bloino, B. G. Janesko, R. Gomperts, B. Mennucci, H. P. Hratchian, J. V. Ortiz, A. F. Izmaylov, J. L. Sonnenberg, D. Williams-Young, F. Ding, F. Lipparini, F. Egidi, J. Goings, B. Peng, A. Petrone, T. Henderson, D. Ranasinghe, V. G. Zakrzewski, J. Gao, N. Rega, G. Zheng, W. Liang, M. Hada, M. Ehara, K. Toyota, R. Fukuda, J. Hasegawa, M. Ishida, T. Nakajima, Y. Honda, O. Kitao, H. Nakai, T. Vreven, K. Throssell, J. A. Montgomery, Jr., J. E. Peralta, F. Ogliaro, M. J. Bearpark, J. J. Heyd, E. N. Brothers, K. N. Kudin, V. N. Staroverov, T. A. Keith, R. Kobayashi, J. Normand, K. Raghavachari, A. P. Rendell, J. C. Burant, S. S. Iyengar, J. Tomasi, M. Cossi, J. M. Millam, M. Klene, C. Adamo, R. Cammi, J. W. Ochterski, R. L. Martin, K. Morokuma, O. Farkas, J. B. Foresman, and D. J. Fox, Gaussian 16, Revision A.03, Gaussian, Inc., Wallingford CT, 2016.
- [4] (a) C. Lee, W. Yang, R. G. Parr, *Phys. Rev. B.* **1988**, *37*, 785-789; (b) A. D. Becke, *J. Chem. Phys.* **1993**, *98*, 5648-5652.
- [5] Y. Zhao, D. G. Truhlar, *Theor. Chem. Acc.* **2008**, *120*, 215-241
- [6] A. V. Marenich, C. J. Cramer, D. G. Truhlar, *J. Phys. Chem. B.* **2019**, *113*, 6378-6396.
- [7] B. Shu, X. Wang, Z. Shen, T. Che, M. Zhong, J. Song, H. Kang, H. Xie, L. Zhang, S. Zhang, *Org. Chem. Front.* **2020**, *7*, 1802-1808.
- [8] J. Liu, X. Zhou, H. Rao, F. Xiao, C. Li, G. Deng, *Eur. J. Org. Chem.* **2011**, *17*, 7996-7999.
- [9] X. Chen, Z. Chen, C.-M. So, *J. Org. Chem.* **2019**, *84*, 6337-6346.
- [10] C. Francisco, J. Juan-Miguel, G. Nùria, A. Mercè, C. Alvaro, S. Lùdia, B. Jordi, R. Hamish, I. Marìa, *J. Med. Chem.* **2004**, *47*, 3874-3886.
- [11] S. Cao, S. Zhong, L. Xin, J.-P. Wan, C.-P. Wen, *Chem. Cat. Chem.* **2015**, *7*, 1478-1482.
- [12] L. Boran and J. Chirik, *J. Am. Chem. Soc.* **2020**, *142*, 2429-2437.
- [13] L. Brant, B. Christophe, C. Wang, N. Oscar, *J. Org. Chem.* **2011**, *76*, 1390-1397.
- [14] C.-C. Ren, T.-Q. Wang, Y. Zhang, D. Peng, X.-Q. Liu, Q.-A. Wu, X.-F. Liu, S.-P. Luo, *ChemistrySelect*, **2021**, *6*, 2523-2528.
- [15] S. Michael, H. K. Ulbrich, D. Gerd, *Eur. J. Org. Chem.* **2008**, *43*, 1152-1159.
- [16] H. Kristina, A. P. Häring, S. F. Kirsch, *Eur. J. Org. Chem.* **2019**, *17*, 2824-2831.
- [17] J. Maud, P. Olivier, J. F. Peyrat, J. D. Brion, H. Abdallah, A. Mouâd, *Tetrahedron*, **2010**, *66*, 3775-3787.
- [18] D.-H. Wang, Z.-G. Zhang, *Org. Lett.* **2003**, *24*, 4645-4648.
- [19] W. Sun, L. Wang, C.-G. Xia, C. Liu, *Angew. Chem. Int. Ed.* **2018**, *57*, 5501-5505; *Angew. Chem.* **2018**, *130*, 5599-5603.
- [20] W.-P. Mai, Y. Liu, H.-D. Sui, Y.-M. Xiao, P. Mao, K. Lu, *Eur. J. Org. Chem.* **2019**, *48*, 7814-7819.
- [21] L.-H. Wang, J. Zhao, *Eur. J. Org. Chem.* **2018**, *31*, 4345-4348.
- [22] G. Liu, B. Xu, *Tetrahedron Lett.* **2018**, *59*, 869-872.
- [23] T. Kerackian, A. Reina, D. Bouyssi, N. Monteiro, A. Amgoune, *Org. Lett.* **2020**, *22*, 2240-2245.
- [24] X. Zhang, Z. Wang, X. Fan, J. Wang, *J. Org. Chem.* **2015**, *80*, 10660-10667.
- [25] M. Shohei, S. Yohei, K. Motomu, *Tetrahedron Lett.* **2012**, *55*, 4381-4384.
